# Supplementary material for: The HexMaze: A Previous Knowledge Task on Map Learning for Mice
Source: eNeuro. 2021 Aug 10;8(4):ENEURO.0554-20.2021. doi: 10.1523/ENEURO.0554-20.2021 (PMC8362685; doi:10.1523/ENEURO.0554-20.2021)
Supplement: Figure 1-1 — Data from all trials used in all figures. Download Figure 1-1, XLSX file. [file enu-eN-NWR-0554-20-s11.xlsx]

## Sheet: Table_S1
Animal_ID	Day	Trial	Week_day	curr_GL	curr_Bar	Food_loc	Start_loc	Comments	Path	Shortest_Path_length	N_nodes_visited	Distance_Traveled (DT)	Distance_Traveled_rel_to_Shortest_Path (DT_SP)	Distance_Traveled_minus_Shortest_Path(DT-SP)	Node_choices_binary	Percentage_correct_choices	Direct_run	Direct_run_after_2_nodes	Eat_on_first_encounter	Sharp_turns_initially	Type	Repeat	Session	exclude_trial	error	probe_trial	probe_after_how_many_days	log_perf
5	1	1	Wed	GL1	bar0	2	24	ate second encounter	24,23,22,21,20,19,18,17,6,1,2,3	6	11	10	1.66667	4	0,1,0,1,1,1,1,1,1,1	80	0	0	0	0	3	1	1					0.221849
5	1	2	Wed	GL1	bar0	2	17	ate second encounter	17,6,9,12,15,22,23,24,16,14,11,14,11,8,10,7,9,6,17,6,1,2,3	3	22	21	7	18	1,0,0,0,0,0,1,1,0,1,0,1,1,1,1,0,1,0,1,1,1	57.1429	0	0	0	0	3	1	1					0.845098
5	1	3	Wed	GL1	bar0	2	8		8,5,4,3,7,9,12,15,22,23,24,16,14,11,8,5,4,3,2	4	19	18	4.5	14	1,1,1,0,0,0,0,0,0,1,1,0,1,1,1,1,1,1	61.1111	0	0	1	0	3	1	1					0.653213
5	1	4	Wed	GL1	bar0	2	23	ate fourth encounter	23,24,16,14,11,8,5,4,5,4,3,2,1	7	12	11	1.57143	4	1,1,0,1,1,1,1,0,1,1,1	81.8182	0	0	0	0	3	1	1					0.196295
5	1	5	Wed	GL1	bar0	2	16	ate second encounter	16,24,23,22,21,20,19,12,9,7,3,2,1	5	12	11	2.2	6	0,0,1,0,1,1,1,1,1,1,1	72.7273	0	0	0	0	3	1	1					0.342423
5	1	6	Wed	GL1	bar0	2	9	3rd	9,12,19,18,17,6,1,2,3	3	8	7	2.33333	4	0,0,1,1,1,1,1	71.4286	0	1	0	0	3	1	1					0.367977
5	1	7	Wed	GL1	bar0	2	5		5,8,11,14,16,24,23,22,23,22,23,24,16,14,11,8,5,4,3,2	3	20	19	6.33333	16	0,0,0,1,0,0,1,0,1,0,1,1,0,1,1,1,1,1,1	57.8947	0	0	1	0	3	1	1					0.801632
5	1	8	Wed	GL1	bar0	2	6		6,1,2	2	3	2	1	0	1,1	100	1	1	1	0	3	1	1					0
5	1	9	Wed	GL1	bar0	2	14	ate at 3	14,11,8,5,4,3,7,9,6,1,6,17,6,1,2,3	6	15	14	2.33333	8	1,1,1,1,1,0,0,1,1,0,0,1,1,1	71.4286	0	0	0	0	3	1	1					0.367977
5	1	10	Wed	GL1	bar0	2	18	2nd	18,19,12,15,13,16,24,23,24,16,14,11,8,5,4,3,2,1	4	17	16	4	12	0,1,0,1,0,0,0,1,1,0,1,1,1,1,1,1	62.5	0	0	0	0	3	1	1					0.60206
5	1	11	Wed	GL1	bar0	2	13		13,10,8,5,4,3,7,9,12,19,18,17,6,1,2	4	15	14	3.5	10	1,0,1,1,1,0,0,0,0,1,1,1,1,1	64.2857	0	0	1	0	3	1	1					0.544068
5	1	12	Wed	GL1	bar0	2	4	4th	4,5,8,10,13,16,24,23,22,15,13,10,7,3,4,5,8,11,14,16,13,10,7,9,6,1,2,3	2	27	26	13	24	0,0,1,0,0,0,0,1,1,1,1,1,1,0,0,0,0,0,1,1,1,1,0,1,1,1	53.8462	0	0	0	0	3	1	1					1.11394
5	1	13	Wed	GL1	bar0	2	21	2nd	21,20,19,18,17,18,19,20,21,22,23,22,21,20,21,22,23,24,16,14,11,8,5,4,3,2,1	7	26	25	3.57143	18	1,1,1,1,0,0,0,0,1,0,1,0,1,0,1,0,1,1,0,1,1,1,1,1,1	64	0	0	0	0	3	1	1					0.552842
5	1	14	Wed	GL1	bar0	2	10		10,8,10,13,15,22,23,22,21,20,19,18,17,6,1,2	3	16	15	5	12	0,1,0,0,0,0,1,0,1,1,1,1,1,1,1	60	0	0	1	1	3	1	1					0.69897
5	1	15	Wed	GL1	bar0	2	19	2nd	19,20,21,22,15,12,19,20,21,22,15,13,16,14,11,8,5,4,3,2,1	5	20	19	3.8	14	0,0,1,1,1,0,0,0,1,1,1,0,0,1,1,1,1,1,1	63.1579	0	0	0	0	3	1	1					0.579784
5	1	16	Wed	GL1	bar0	2	16	4th	16,14,11,8,5,4,3,2,1	5	8	7	1.4	2	0,1,1,1,1,1,1	85.7143	0	1	0	0	3	1	1					0.146128
5	1	17	Wed	GL1	bar0	2	17		17,18,17,6,1,2	3	6	5	1.66667	2	0,1,1,1,1	80	0	1	1	1	3	1	1					0.221849
5	1	18	Wed	GL1	bar0	2	22		22,23,24,16,13,10,8,11,8,5,4,3,2	6	13	12	2	6	0,1,1,1,1,0,0,1,1,1,1,1	75	0	0	1	0	3	1	1					0.30103
5	1	19	Wed	GL1	bar0	2	7		7,10,8,10,13,15,22,23,24,16,13,10,7,3,2	2	15	14	7	12	0,0,1,0,0,0,0,1,1,1,1,1,1,1	57.1429	0	0	1	1	3	1	1					0.845098
6	1	1	Wed	GL1	bar0	10	21	2nd	21,22,23,24,16,14,11,8,10,13	4	9	8	2	4	1,0,1,1,0,1,1,1	75	0	0	0	0	3	1	1					0.30103
6	1	2	Wed	GL1	bar0	10	2		2,1,6,9,12,19,20,21,22,23,24,16,14,11,8,5,4,3,2,1,6,17,18,19,20,21,22,15,13,16,24,23,22,15,12,9,6,1,2,1,6,17,18,19,20,21,22,23,24,16,14,11,8,5,4,5,4,3,2,1,6,17,18,19,12,9,7,3,4,5,8,11,14,16,13,15,12,9,7,10	3	80	79	26.3333	76	0,1,1,0,0,0,1,1,0,1,1,0,1,1,0,0,1,0,0,1,0,0,1,0,1,1,1,1,0,0,0,1,1,0,1,0,0,1,0,1,0,0,1,0,1,1,0,1,1,0,1,1,0,0,1,0,1,0,0,1,0,0,1,1,1,1,0,0,1,1,0,0,1,1,0,0,1,1,1	51.8987	0	0	1	0	3	1	1					1.42051
6	1	3	Wed	GL1	bar0	10	23		23,22,21,22,23,24,16,13,10	4	9	8	2	4	1,0,1,0,1,1,1,1	75	0	0	1	1	3	1	1					0.30103
6	1	4	Wed	GL1	bar0	10	17		17,6,1,2,3,7,10	4	7	6	1.5	2	1,0,1,1,1,1	83.3333	0	1	1	0	3	1	1					0.176091
6	1	5	Wed	GL1	bar0	10	11		11,8,11,14,16,13,15,22,23,24,16,14,11,8,10	2	15	14	7	12	1,0,0,1,1,0,0,0,1,1,0,1,1,1	57.1429	0	0	1	1	3	1	1					0.845098
6	1	6	Wed	GL1	bar0	10	20		20,21,22,23,24,16,14,11,8,10	5	10	9	1.8	4	1,1,0,1,1,0,1,1,1	77.7778	0	0	1	0	3	1	1					0.255273
6	1	7	Wed	GL1	bar0	10	9	Continuous climbing	9,6,1,2,3,4,5,8,11,14,16,24,23,22,21,22,15,12,19,20,19,18,17,6,1,2,3,4,5,8,11,8,5,4,3,2,1,6,17,18,19,20,21,22,23,24,16,14,11,8,10	2	51	50	25	48	0,0,1,1,0,1,1,0,0,1,0,0,1,0,1,1,0,0,0,1,0,1,1,0,1,1,0,1,1,0,1,0,0,1,0,0,1,0,0,1,0,1,1,0,1,1,0,1,1,1	52	0	0	1	0	3	1	1					1.39794
6	1	8	Wed	GL1	bar0	10	22		22,23,24,16,13,10	3	6	5	1.66667	2	0,1,1,1,1	80	0	1	1	0	3	1	1					0.221849
6	1	9	Wed	GL1	bar0	10	4		4,3,7,10	3	4	3	1	0	1,1,1	100	1	1	1	0	3	1	1					0
6	1	10	Wed	GL1	bar0	10	15		15,22,23,24,16,14,11,8,5,4,3,2,1,6,17,18,19,20,21,22,23,24,16,14,16,24,23,22,21,20,19,12,9,7,10	2	35	34	17	32	0,0,1,1,0,1,1,0,0,1,0,0,1,0,0,1,0,1,1,0,1,1,0,1,0,0,1,0,0,1,1,1,1,1	52.9412	0	0	1	0	3	1	1					1.23045
6	1	11	Wed	GL1	bar0	10	6		6,17,18,19,12,9,7,10	3	8	7	2.33333	4	0,0,1,1,1,1,1	71.4286	0	1	1	0	3	1	1					0.367977
6	1	12	Wed	GL1	bar0	10	23		23,24,16,13,10	4	5	4	1	0	1,1,1,1	100	1	1	1	0	3	1	1					0
6	1	13	Wed	GL1	bar0	10	2		2,1,6,9,7,10	3	6	5	1.66667	2	0,1,1,1,1	80	0	1	1	0	3	1	1					0.221849
6	1	14	Wed	GL1	bar0	10	11		11,8,5,4,3,2,1,6,17,18,19,20,21,22,23,22,21,20,19,18,17,6,9,12,15,13,16,14,11,8,10	2	31	30	15	28	1,0,0,1,0,0,1,0,0,1,0,1,1,0,1,0,0,1,0,1,1,1,0,1,1,0,0,1,1,1	53.3333	0	0	1	0	3	1	1					1.17609
6	1	15	Wed	GL1	bar0	10	19		19,18,17,6,9,7,10	4	7	6	1.5	2	0,1,1,1,1,1	83.3333	0	1	1	0	3	1	1					0.176091
6	1	16	Wed	GL1	bar0	10	2		2,1,6,9,7,10	3	6	5	1.66667	2	0,1,1,1,1	80	0	1	1	0	3	1	1					0.221849
6	1	17	Wed	GL1	bar0	10	17	Possible strategy: get to the center loop, using the central cue, then search for food everywhere on the loop	17,18,19,12,15,13,10	4	7	6	1.5	2	0,1,1,1,1,1	83.3333	0	1	1	0	3	1	1					0.176091
6	1	18	Wed	GL1	bar0	10	14		14,11,14,16,24,16,14,11,8,10	3	10	9	3	6	1,0,1,0,1,0,1,1,1	66.6667	0	0	1	1	3	1	1					0.477121
6	1	19	Wed	GL1	bar0	10	21		21,22,15,12,9,7,3,4,5,8,11,14,11,8,5,4,3,2,1,2,3,4,5,4,3,2,1,6,17,18,19,20,19,12,9,7,10	4	37	36	9	32	1,1,0,1,1,0,0,1,1,0,0,1,1,0,0,1,0,0,1,1,0,1,0,1,0,0,1,0,0,1,0,1,1,1,1,1	55.5556	0	0	1	0	3	1	1					0.954243
6	1	20	Wed	GL1	bar0	10	3		3,4,5,8,10	2	5	4	2	2	0,1,1,1	75	0	1	1	0	3	1	1					0.30103
7	1	1	Wed	GL1	bar0	19	4		4,5,8,11,14,16,24,23,22,21,20,19	5	12	11	2.2	6	0,1,0,1,1,0,1,1,1,1,1	72.7273	0	0	1	0	3	1	1					0.342423
7	1	2	Wed	GL1	bar0	19	21		21,20,19	2	3	2	1	0	1,1	100	1	1	1	0	3	1	1					0
7	1	3	Wed	GL1	bar0	19	11		11,14,16,24,23,22,21,20,19	6	9	8	1.33333	2	1,1,0,1,1,1,1,1	87.5	0	0	1	0	3	1	1					0.124939
7	1	4	Wed	GL1	bar0	19	17		17,6,1,2,3,7,10,8,5,4,3,2,1,6,17,18,19,20	2	17	16	8	14	0,0,0,1,1,0,0,0,1,1,0,1,1,1,1,1	56.25	0	0	0	0	3	1	1					0.90309
7	1	5	Wed	GL1	bar0	19	7		7,3,2,1,6,17,18,19	3	8	7	2.33333	4	0,0,1,1,1,1,1	71.4286	0	1	1	0	3	1	1					0.367977
7	1	6	Wed	GL1	bar0	19	23		23,24,16,14,11,8,5,4,3,7,9,6,1,2,3,4,5,8,11,14,16,13,15,22,21,20,19	4	27	26	6.5	22	0,1,0,0,1,0,1,1,1,1,0,0,0,1,0,0,1,0,1,1,1,1,0,1,1,1	57.6923	0	0	1	0	3	1	1					0.812913
7	1	7	Wed	GL1	bar0	19	3		3,2,1,6,17,18,19	4	7	6	1.5	2	0,1,1,1,1,1	83.3333	0	1	1	0	3	1	1					0.176091
7	1	8	Wed	GL1	bar0	19	13		13,10,8,11,14,16,24,23,22,15,12,9,6,17,18,19	3	16	15	5	12	0,0,0,1,1,0,1,1,1,1,0,0,1,1,1	60	0	0	1	0	3	1	1					0.69897
7	1	9	Wed	GL1	bar0	19	6		6,17,18,19	3	4	3	1	0	1,1,1	100	1	1	1	0	3	1	1					0
7	1	10	Wed	GL1	bar0	19	16		16,24,23,22,21,20,19	4	7	6	1.5	2	0,1,1,1,1,1	83.3333	0	1	1	0	3	1	1					0.176091
7	1	11	Wed	GL1	bar0	19	21		21,20,19	2	3	2	1	0	1,1	100	1	1	1	0	3	1	1					0
7	1	12	Wed	GL1	bar0	19	2		2,1,6,17,18,19,12	5	6	5	1	0	1,1,1,1,1	100	1	1	0	0	3	1	1					0
7	1	13	Wed	GL1	bar0	19	15		15,22,23,24,16,14,11,8,5,4,3,7,10,8,5,4,5,8,11,14,16,13,10,8,5,4,3,2,1,6,17,18,19	2	33	32	16	30	0,0,0,1,0,0,1,0,1,1,1,0,0,0,1,0,1,0,1,1,1,0,0,0,1,1,0,1,1,1,1,1	53.125	0	0	1	0	3	1	1					1.20412
7	1	14	Wed	GL1	bar0	19	4		4,3,2,1,6,9,12,19	5	8	7	1.4	2	1,0,1,1,1,1,1	85.7143	0	1	1	0	3	1	1					0.146128
7	1	15	Wed	GL1	bar0	19	22		22,23,24,16,14,11,8,5,4,5,8,10,7,9,12,19	3	16	15	5	12	0,0,1,0,0,1,0,1,0,1,1,1,1,1,1	60	0	0	1	0	3	1	1					0.69897
7	1	16	Wed	GL1	bar0	19	7		7,3,2,1,6,17,18,19	3	8	7	2.33333	4	0,0,1,1,1,1,1	71.4286	0	1	1	0	3	1	1					0.367977
7	1	17	Wed	GL1	bar0	19	14		14,16,13,15,22,21,20,19	5	8	7	1.4	2	1,1,1,0,1,1,1	85.7143	0	0	1	0	3	1	1					0.146128
7	1	18	Wed	GL1	bar0	19	6		6,17,18,19	3	4	3	1	0	1,1,1	100	1	1	1	0	3	1	1					0
7	1	19	Wed	GL1	bar0	19	13		13,16,24,16,14,11,8,5,4,3,2,1,6,17,18,19	3	16	15	5	12	0,0,1,0,0,1,0,1,1,0,1,1,1,1,1	60	0	0	1	1	3	1	1					0.69897
7	1	20	Wed	GL1	bar0	19	7		7,3,4,5,8,10,13,16,24,23,22,23,24,16,14,11,8,10,7,3,2,3,4,5,8,10,7,9,6,17,18,19	3	32	31	10.3333	28	0,0,0,1,1,1,0,0,1,1,0,0,1,0,0,1,1,1,0,0,1,0,0,1,1,1,1,0,1,1,1	54.8387	0	0	1	0	3	1	1					1.01424
7	1	21	Wed	GL1	bar0	19	24		24,16,13,15,22,23,22,21,20,19	5	10	9	1.8	4	1,1,1,0,0,1,1,1,1	77.7778	0	0	1	0	3	1	1					0.255273
7	1	22	Wed	GL1	bar0	19	15		15,12,19	2	3	2	1	0	1,1	100	1	1	1	0	3	1	1					0
7	1	23	Wed	GL1	bar0	19	4		4,3,2,1,6,9,7,3,4,5,8,11,14,16,24,23,22,21,20,19,12	5	20	19	3.8	14	1,0,1,1,1,0,0,0,0,1,0,1,1,0,1,1,1,1,1	63.1579	0	0	0	0	3	1	1					0.579784
7	1	24	Wed	GL1	bar0	19	6	IB: head shaking at choice, at around 28 mins. Node 22	6,1,2,3,7,10,13,15,22,21,20,19	3	12	11	3.66667	8	0,0,1,1,0,1,1,0,1,1,1	63.6364	0	0	1	0	3	1	1					0.564271
7	1	25	Wed	GL1	bar0	19	13		13,16,24,23,24,16,24,23,22,15,12,9,7,3,4,5,8,11,14,16,24,23,22,15,12,9,7,3,4,5,8,10,7,9,6,17,18,19	3	38	37	12.3333	34	0,0,1,0,1,0,1,1,1,1,0,0,0,0,0,1,0,1,1,0,1,1,1,1,0,0,0,0,0,1,1,1,1,0,1,1,1	54.0541	0	0	1	0	3	1	1					1.09108
8	1	1	Wed	GL1	bar0	23	1		1,6,9,7,3,2,1,6,17,18,19,20,21,22,23	6	15	14	2.33333	8	1,1,0,0,0,1,1,0,1,1,1,1,1,1	71.4286	0	0	1	0	3	1	1					0.367977
8	1	2	Wed	GL1	bar0	23	11		11,14,16,24,23	4	5	4	1	0	1,1,1,1	100	1	1	1	0	3	1	1					0
8	1	3	Wed	GL1	bar0	23	19		19,20,21,22,23	4	5	4	1	0	1,1,1,1	100	1	1	1	0	3	1	1					0
8	1	4	Wed	GL1	bar0	23	6		6,1,2,3,7,10,13,16,14,11,8,10,7,9,12,15,22,23	5	18	17	3.4	12	0,0,1,1,1,1,1,0,0,0,1,0,1,1,1,1,1	64.7059	0	0	1	0	3	1	1					0.531479
8	1	5	Wed	GL1	bar0	23	16		16,24,23	2	3	2	1	0	1,1	100	1	1	1	0	3	1	1					0
8	1	6	Wed	GL1	bar0	23	7		7,10,13,15,22,23	5	6	5	1	0	1,1,1,1,1	100	1	1	1	0	3	1	1					0
8	1	7	Wed	GL1	bar0	23	21		21,20,19,18,17,6,1,2,3,4,5,8,11,14,16,24,23	2	17	16	8	14	0,0,0,0,1,0,0,1,0,1,1,1,1,1,1,1	56.25	0	0	1	0	3	1	1					0.90309
8	1	8	Wed	GL1	bar0	23	14	stopped using tp roll	14,11,8,10,7,9,12,19,20,21,22,23	3	12	11	3.66667	8	0,0,1,0,1,1,0,1,1,1,1	63.6364	0	0	1	0	3	1	1					0.564271
8	1	9	Wed	GL1	bar0	23	3		3,7,9,12,19,20,21,22,23	6	9	8	1.33333	2	1,1,1,0,1,1,1,1	87.5	0	0	1	0	3	1	1					0.124939
8	1	10	Wed	GL1	bar0	23	6		6,17,18,19,20,21,22,23	5	8	7	1.4	2	0,1,1,1,1,1,1	85.7143	0	1	1	0	3	1	1					0.146128
8	1	11	Wed	GL1	bar0	23	11		11,14,16,13,15,22,21,20,19,18,17,18,19,20,21,22,23	4	17	16	4	12	1,1,0,1,1,0,0,0,0,0,1,1,1,1,1,1	62.5	0	0	1	0	3	1	1					0.60206
8	1	12	Wed	GL1	bar0	23	18		18,17,6,9,7,10,8,11,14,16,24,23	5	12	11	2.2	6	0,1,1,0,1,0,1,1,1,1,1	72.7273	0	0	1	0	3	1	1					0.342423
8	1	13	Wed	GL1	bar0	23	1		1,2,3,4,5,8,11,14,16,24,23	6	11	10	1.66667	4	0,1,0,1,1,1,1,1,1,1	80	0	0	1	0	3	1	1					0.221849
8	1	14	Wed	GL1	bar0	23	9		9,12,15,22,23	4	5	4	1	0	1,1,1,1	100	1	1	1	0	3	1	1					0
8	1	15	Wed	GL1	bar0	23	13		13,10,8,11,14,11,8,5,4,3,2,1,6,17,18,19,20,21,22,23	3	20	19	6.33333	16	0,0,1,1,0,0,0,0,1,0,1,1,0,1,1,1,1,1,1	57.8947	0	0	1	0	3	1	1					0.801632
8	1	16	Wed	GL1	bar0	23	6		6,17,18,19,20,21,22,23	5	8	7	1.4	2	0,1,1,1,1,1,1	85.7143	0	1	1	0	3	1	1					0.146128
8	1	17	Wed	GL1	bar0	23	11		11,14,16,24,23	4	5	4	1	0	1,1,1,1	100	1	1	1	0	3	1	1					0
8	1	18	Wed	GL1	bar0	23	7		7,9,6,1,2,3,7,9,12,19,18,17,6,9,12,15,13,16,24,23	5	20	19	3.8	14	1,0,0,0,1,1,1,1,0,0,0,1,1,1,1,0,1,1,1	63.1579	0	0	1	0	3	1	1					0.579784
8	1	19	Wed	GL1	bar0	23	20		20,19,12,15,13,16,14,11,8,5,4,3,2,1,6,17,18,19,20,21,22,23	3	22	21	7	18	0,1,1,0,1,0,0,0,0,0,1,0,1,1,0,1,1,1,1,1,1	57.1429	0	0	1	0	3	1	1					0.845098
8	1	20	Wed	GL1	bar0	23	1		1,2,3,7,10,13,16,24,23	6	9	8	1.33333	2	0,1,1,1,1,1,1,1	87.5	0	1	1	0	3	1	1					0.124939
8	1	21	Wed	GL1	bar0	23	10		10,8,11,14,16,24,23	4	7	6	1.5	2	0,1,1,1,1,1	83.3333	0	1	1	0	3	1	1					0.176091
8	1	22	Wed	GL1	bar0	23	12		12,15,22,23	3	4	3	1	0	1,1,1	100	1	1	1	0	3	1	1					0
5	2	1	Fri	GL1	bar0	2	18	probe trial	18,19,12,15,22,21,20,19,18,17,6,1,2,3	4	13	12	3	8	0,1,0,0,0,1,1,1,1,1,1,1	66.6667	0	0	0	0	3	1	2			1		0.477121
5	2	2	Fri	GL1	bar0	2	16		16,14,11,8,10,7,3,2	5	8	7	1.4	2	0,1,1,1,1,1,1	85.7143	0	1	1	0	3	1	2					0.146128
5	2	3	Fri	GL1	bar0	2	8		8,10,7,9,12,15,22,23,24,16,14,11,8,10,7,9,12,19,20,21,20,21,22,23,24,23,22,21,20,19,18,17,6,1,2	4	35	34	8.5	30	1,1,0,0,0,0,0,1,1,0,1,1,1,1,0,0,0,0,0,1,0,1,0,1,0,1,0,1,1,1,1,1,1,1	55.8824	0	0	1	0	3	1	2					0.929419
5	2	4	Fri	GL1	bar0	2	17		17,6,1,2	3	4	3	1	0	1,1,1	100	1	1	1	0	3	1	2					0
5	2	5	Fri	GL1	bar0	2	5		5,8,11,14,11,8,5,4,3,2	3	10	9	3	6	0,0,0,1,1,1,1,1,1	66.6667	0	0	1	0	3	1	2					0.477121
5	2	6	Fri	GL1	bar0	2	15		15,13,16,24,23,22,21,20,19,18,17,6,1,2	5	14	13	2.6	8	1,0,0,0,1,0,1,1,1,1,1,1,1	69.2308	0	0	1	0	3	1	2					0.414973
5	2	7	Fri	GL1	bar0	2	7		7,9,12,19,20,21,22,23,24,16,14,11,8,5,4,3,2,1	2	17	16	8	14	0,0,0,0,0,1,0,1,1,0,1,1,1,1,1,1	56.25	0	0	0	0	3	1	2					0.90309
5	2	8	Fri	GL1	bar0	2	16		16,24,23,22,21,20,19,18,17,6,1,2	5	12	11	2.2	6	0,0,1,0,1,1,1,1,1,1,1	72.7273	0	0	1	0	3	1	2					0.342423
5	2	9	Fri	GL1	bar0	2	20	probe trial	20,19,12,15,13,10,8,11,8,5,4,3,2,1	6	13	12	2	6	1,1,0,1,1,0,0,1,1,1,1,1	75	0	0	0	0	3	1	2			9		0.30103
5	2	10	Fri	GL1	bar0	2	13		13,16,14,11,8,5,4,3,2	4	9	8	2	4	0,0,1,1,1,1,1,1	75	0	1	1	0	3	1	2					0.30103
5	2	11	Fri	GL1	bar0	2	4		4,5,8,10,13,15,22,21,20,21,22,23,24,16,13,10,7,3,2	2	19	18	9	16	0,0,1,0,0,0,0,1,0,1,0,1,1,1,1,1,1,1	55.5556	0	0	1	0	3	1	2					0.954243
5	2	12	Fri	GL1	bar0	2	11		11,14,16,24,23,22,15,12,9,6,1,2	5	12	11	2.2	6	0,1,0,0,1,1,1,1,1,1,1	72.7273	0	0	1	0	3	1	2					0.342423
5	2	13	Fri	GL1	bar0	2	17		17,6,9,7,10,8,11,14,11,8,5,4,3,2	3	14	13	4.33333	10	1,0,1,0,0,0,0,1,1,1,1,1,1	61.5385	0	0	1	0	3	1	2					0.636822
5	2	14	Fri	GL1	bar0	2	24		24,23,22,21,20,19,18,17,6,1,2,3	6	11	10	1.66667	4	0,1,0,1,1,1,1,1,1,1	80	0	0	0	0	3	1	2					0.221849
5	2	15	Fri	GL1	bar0	2	9		9,12,19,20,21,22,23,22,23,22,23,24,16,14,11,8,5,4,3,2	3	20	19	6.33333	16	0,0,0,0,1,0,1,0,1,0,1,1,0,1,1,1,1,1,1	57.8947	0	0	1	0	3	1	2					0.801632
5	2	16	Fri	GL1	bar0	2	18		18,19,12,9,6,1,2	4	7	6	1.5	2	0,1,1,1,1,1	83.3333	0	1	1	0	3	1	2					0.176091
5	2	17	Fri	GL1	bar0	2	4		4,5,4,3,2,1	2	5	4	2	2	0,1,1,1	75	0	1	0	1	3	1	2					0.30103
5	2	18	Fri	GL1	bar0	2	20		20,19,18,17,6,1,2	6	7	6	1	0	1,1,1,1,1,1	100	1	1	1	0	3	1	2					0
5	2	19	Fri	GL1	bar0	2	6		6,17,18,19,20,21,22,23,24,16,14,11,14,11,8,5,4,3,2	2	19	18	9	16	0,0,0,0,0,1,0,1,1,0,1,0,1,1,1,1,1,1	55.5556	0	0	1	0	3	1	2					0.954243
5	2	20	Fri	GL1	bar0	2	13		13,16,24,16,14,11,8,5,4,3,2	4	11	10	2.5	6	0,0,1,0,1,1,1,1,1,1	70	0	0	1	1	3	1	2					0.39794
5	2	21	Fri	GL1	bar0	2	19		19,18,17,6,1,2,3	5	6	5	1	0	1,1,1,1,1	100	1	1	0	0	3	1	2					0
5	2	22	Fri	GL1	bar0	2	4		4,5,8,11,14,11,8,11,14,11,8,5,4,3,2	2	15	14	7	12	0,0,0,0,1,1,0,0,1,1,1,1,1,1	57.1429	0	0	1	0	3	1	2					0.845098
5	2	23	Fri	GL1	bar0	2	24		24,23,22,23,22,15,13,10,7,3,2,1	6	11	10	1.66667	4	0,1,0,1,1,1,1,1,1,1	80	0	0	0	1	3	1	2					0.221849
6	2	1	Fri	GL1	bar0	10	17	probe trial	17,18,19,12,9,7,3,4,5,8,11,14,16,13,15,22,21,20,19,18,17,6,1,2,3,4,5,8,11,14,16,24,23,22,21,20,19,18,17,6,1,2,3,4,5,8,10,7	4	47	46	11.5	42	0,1,1,1,1,0,0,1,1,0,0,1,1,0,0,0,0,1,0,1,1,0,1,1,0,1,1,0,0,1,0,0,1,0,0,1,0,1,1,0,1,1,0,1,1,1	54.3478	0	0	0	0	3	1	2			1		1.0607
6	2	2	Fri	GL1	bar0	10	24		24,23,22,21,20,19,18,17,6,9,7,10	3	12	11	3.66667	8	0,1,0,0,1,0,1,1,1,1,1	63.6364	0	0	1	0	3	1	2					0.564271
6	2	3	Fri	GL1	bar0	10	1		1,6,9,7,10	4	5	4	1	0	1,1,1,1	100	1	1	1	0	3	1	2					0
6	2	4	Fri	GL1	bar0	10	21		21,22,23,24,16,13,10	4	7	6	1.5	2	1,0,1,1,1,1	83.3333	0	1	1	0	3	1	2					0.176091
6	2	5	Fri	GL1	bar0	10	3		3,2,1,6,9,12,15,13,10	2	9	8	4	6	0,0,1,1,0,1,1,1	62.5	0	0	1	0	3	1	2					0.60206
6	2	6	Fri	GL1	bar0	10	23		23,22,21,20,19,12,9,7,10	4	9	8	2	4	1,0,0,1,1,1,1,1	75	0	0	1	0	3	1	2					0.30103
6	2	7	Fri	GL1	bar0	10	9		9,6,1,2,3,7,10	2	7	6	3	4	0,0,1,1,1,1	66.6667	0	1	1	0	3	1	2					0.477121
6	2	8	Fri	GL1	bar0	10	5		5,4,3,2,1,6,9,12,19,20,21,22,23,24,16,14,11,8,5,4,3,2,1,6,17,18,19,20,21,22,23,24,16,14,11,8,5,4,3,2,1,6,9,12,15,13,10	2	47	46	23	44	0,1,0,0,1,1,0,0,0,1,1,0,1,1,0,1,1,0,0,1,0,0,1,0,0,1,0,1,1,0,1,1,0,1,1,0,0,1,0,0,1,1,0,1,1,1	52.1739	0	0	1	0	3	1	2					1.36173
6	2	9	Fri	GL1	bar0	10	18	probe trial	18,19,12,9,7,3,4,5,8,11,14,16,13,10,8	5	14	13	2.6	8	1,1,1,1,0,0,1,1,0,0,1,1,1	69.2308	0	0	0	0	3	1	2			9		0.414973
6	2	10	Fri	GL1	bar0	10	22		22,15,13,10	3	4	3	1	0	1,1,1	100	1	1	1	0	3	1	2					0
6	2	11	Fri	GL1	bar0	10	11		11,8,10	2	3	2	1	0	1,1	100	1	1	1	0	3	1	2					0
6	2	12	Fri	GL1	bar0	10	19		19,18,17,6,1,2,3,7,10	4	9	8	2	4	0,1,1,0,1,1,1,1	75	0	0	1	0	3	1	2					0.30103
6	2	13	Fri	GL1	bar0	10	17		17,18,19,20,21,22,23,24,16,13,10	4	11	10	2.5	6	0,1,0,1,1,0,1,1,1,1	70	0	0	1	0	3	1	2					0.39794
6	2	14	Fri	GL1	bar0	10	2		2,3,4,5,8,11,14,16,24,23,22,15,12,19,18,17,6,1,2,3,4,5,8,11,14,16,24,23,22,21,20,19,18,17,18,17,6,1,2,3,4,5,8,11,14,16,24,23,22,21,20,19,18,17,6,9,7,10	3	58	57	19	54	1,0,1,1,0,0,1,0,0,1,1,0,0,0,1,1,0,1,1,0,1,1,0,0,1,0,0,1,0,0,1,0,1,0,1,1,0,1,1,0,1,1,0,0,1,0,0,1,0,0,1,0,1,1,1,1,1	52.6316	0	0	1	0	3	1	2					1.27875
6	2	15	Fri	GL1	bar0	10	14		14,11,8,5,4,3,2,1,6,17,18,19,12,15,13,10	3	16	15	5	12	1,1,0,0,1,0,0,1,0,0,1,1,1,1,1	60	0	0	1	0	3	1	2					0.69897
6	2	16	Fri	GL1	bar0	10	15		15,12,9,7,3,4,5,8,10	2	9	8	4	6	0,1,1,0,0,1,1,1	62.5	0	0	1	0	3	1	2					0.60206
6	2	17	Fri	GL1	bar0	10	11		11,8,10	2	3	2	1	0	1,1	100	1	1	1	0	3	1	2					0
6	2	18	Fri	GL1	bar0	10	4		4,3,7,10	3	4	3	1	0	1,1,1	100	1	1	1	0	3	1	2					0
6	2	19	Fri	GL1	bar0	10	17		17,18,19,12,15,13,16,14,11,8,10	4	11	10	2.5	6	0,1,1,1,1,0,0,1,1,1	70	0	0	1	0	3	1	2					0.39794
6	2	20	Fri	GL1	bar0	10	24		24,16,14,11,8,5,4,5,4,3,2,1,2,3,4,5,8,11,14,11,8,5,4,3,7,10	3	26	25	8.33333	22	1,0,1,1,0,0,1,0,1,0,0,1,1,0,1,1,0,0,1,1,0,0,1,1,1	56	0	0	1	0	3	1	2					0.920819
6	2	21	Fri	GL1	bar0	10	20		20,21,22,23,24,16,14,11,8,5,4,3,7,9,12,15,22,23,24,16,13,15,12,9,6,17,18,19,20,21,22,23,24,16,14,11,8,5,4,3,2,1,6,17,18,19,12,9,7,3,4,5,8,11,14,16,24,23,22,21,20,21,22,15,13,10	5	66	65	13	60	1,1,0,1,1,0,1,1,0,0,1,1,0,0,1,0,0,1,1,1,0,0,1,0,0,0,1,0,1,1,0,1,1,0,1,1,0,0,1,0,0,1,0,0,1,1,1,1,0,0,1,1,0,0,1,0,0,1,0,0,1,1,1,1,1	53.8462	0	0	1	0	3	1	2					1.11394
7	2	1	Fri	GL1	bar0	19	21	probe trial	21,22,15,12,19,18	2	5	4	2	2	0,1,1,1	75	0	1	0	0	3	1	2			1		0.30103
7	2	2	Fri	GL1	bar0	19	3		3,4,5,8,10,7,9,12,19	4	9	8	2	4	0,0,1,1,1,1,1,1	75	0	1	1	0	3	1	2					0.30103
7	2	3	Fri	GL1	bar0	19	11		11,14,16,13,10,8,11,14,16,13,15,12,19	6	13	12	2	6	1,1,1,0,0,0,1,1,1,1,1,1	75	0	0	1	0	3	1	2					0.30103
7	2	4	Fri	GL1	bar0	19	17		17,6,9,7,10,13,15,12,9,6,17,18,19	2	13	12	6	10	0,1,0,0,1,1,1,0,0,1,1,1	58.3333	0	0	1	0	3	1	2					0.778151
7	2	5	Fri	GL1	bar0	19	7		7,3,4,5,8,10,7,9,6,17,18,19	3	12	11	3.66667	8	0,0,0,1,1,1,1,0,1,1,1	63.6364	0	0	1	0	3	1	2					0.564271
7	2	6	Fri	GL1	bar0	19	23		23,24,16,14,11,14,16,24,23,22,21,20,19	4	13	12	3	8	0,1,0,0,1,1,0,1,1,1,1,1	66.6667	0	0	1	0	3	1	2					0.477121
7	2	7	Fri	GL1	bar0	19	16		16,24,23,22,21,20,19	4	7	6	1.5	2	0,1,1,1,1,1	83.3333	0	1	1	0	3	1	2					0.176091
7	2	8	Fri	GL1	bar0	19	17		17,6,9,12,19	2	5	4	2	2	0,1,1,1	75	0	1	1	0	3	1	2					0.30103
7	2	9	Fri	GL1	bar0	19	2	probe trial	2,1,6,9,12,19,20	5	6	5	1	0	1,1,1,1,1	100	1	1	0	0	3	1	2			9		0
7	2	10	Fri	GL1	bar0	19	4		4,5,8,10,7,3,2,1,6,17,18,19	5	12	11	2.2	6	0,1,1,1,0,0,1,1,1,1,1	72.7273	0	0	1	0	3	1	2					0.342423
7	2	11	Fri	GL1	bar0	19	9		9,6,1,6,17,18,19	2	7	6	3	4	0,0,1,1,1,1	66.6667	0	1	1	1	3	1	2					0.477121
7	2	12	Fri	GL1	bar0	19	11		11,14,16,24,23,22,15,22,21,20,19	6	11	10	1.66667	4	1,1,0,1,1,1,0,1,1,1	80	0	0	1	0	3	1	2					0.221849
7	2	13	Fri	GL1	bar0	19	15		15,22,21,20,19	2	5	4	2	2	0,1,1,1	75	0	1	1	0	3	1	2					0.30103
7	2	14	Fri	GL1	bar0	19	3		3,4,5,8,10,7,9,12,19	4	9	8	2	4	0,0,1,1,1,1,1,1	75	0	1	1	0	3	1	2					0.30103
7	2	15	Fri	GL1	bar0	19	23		23,22,15,13,16,24,23,22,15,13,16,24,23,22,15,13,16,24,23,22,15,12,9,6,17,18,19	4	27	26	6.5	22	1,1,0,0,0,1,1,1,0,0,0,1,1,1,0,0,0,1,1,1,1,0,0,1,1,1	57.6923	0	0	1	0	3	1	2					0.812913
7	2	16	Fri	GL1	bar0	19	16		16,24,23,22,15,12,19	4	7	6	1.5	2	0,1,1,1,1,1	83.3333	0	1	1	0	3	1	2					0.176091
7	2	17	Fri	GL1	bar0	19	7		7,10,13,15,22,21,20,19	3	8	7	2.33333	4	0,1,1,0,1,1,1	71.4286	0	0	1	0	3	1	2					0.367977
7	2	18	Fri	GL1	bar0	19	11		11,14,16,13,15,12,9,7,10,8,11,14,16,24,23,22,21,20,19	6	19	18	3	12	1,1,1,1,1,0,0,0,0,0,1,1,0,1,1,1,1,1	66.6667	0	0	1	0	3	1	2					0.477121
7	2	19	Fri	GL1	bar0	19	21		21,20,19,18	2	3	2	1	0	1,1	100	1	1	0	0	3	1	2					0
7	2	20	Fri	GL1	bar0	19	7		7,3,4,5,8,10,13,16,24,23,22,23,24,16,13,15,12,19	3	18	17	5.66667	14	0,0,0,1,1,1,0,0,1,1,0,0,1,1,1,1,1	58.8235	0	0	1	0	3	1	2					0.753328
7	2	21	Fri	GL1	bar0	19	24		24,23,22,15,12,19,20	5	6	5	1	0	1,1,1,1,1	100	1	1	0	0	3	1	2					0
7	2	22	Fri	GL1	bar0	19	17		17,18,19,12	2	3	2	1	0	1,1	100	1	1	0	0	3	1	2					0
8	2	1	Fri	GL1	bar0	23	11	probe trial	11,14,16,13,10,7,3,4,5,8,10,13,15,12,19,20,21,22,23,24	4	19	18	4.5	14	1,1,0,0,0,0,0,1,1,1,1,1,0,0,1,1,1,1	61.1111	0	0	0	0	3	1	2			1		0.653213
8	2	2	Fri	GL1	bar0	23	6		6,1,6,17,18,19,20,21,22,23	5	10	9	1.8	4	0,1,0,1,1,1,1,1,1	77.7778	0	0	1	1	3	1	2					0.255273
8	2	3	Fri	GL1	bar0	23	19		19,18,19,20,21,22,23	4	7	6	1.5	2	0,1,1,1,1,1	83.3333	0	1	1	1	3	1	2					0.176091
8	2	4	Fri	GL1	bar0	23	9		9,12,15,22,23	4	5	4	1	0	1,1,1,1	100	1	1	1	0	3	1	2					0
8	2	5	Fri	GL1	bar0	23	16		16,24,23	2	3	2	1	0	1,1	100	1	1	1	0	3	1	2					0
8	2	6	Fri	GL1	bar0	23	3		3,7,10,13,15,22,23	6	7	6	1	0	1,1,1,1,1,1	100	1	1	1	0	3	1	2					0
8	2	7	Fri	GL1	bar0	23	21		21,20,19,18,17,6,9,12,15,22,23	2	11	10	5	8	0,0,0,0,1,1,1,1,1,1	60	0	0	1	0	3	1	2					0.69897
8	2	8	Fri	GL1	bar0	23	1		1,2,3,7,10,13,16,24,23	6	9	8	1.33333	2	0,1,1,1,1,1,1,1	87.5	0	1	1	0	3	1	2					0.124939
8	2	9	Fri	GL1	bar0	23	5	probe trial	5,8,11,14,16,24,23,22	6	7	6	1	0	1,1,1,1,1,1	100	1	1	0	0	3	1	2			9		0
8	2	10	Fri	GL1	bar0	23	15	IB at 12:30: couple of clear ?changes of mind?	15,12,9,12,15,13,10,13,16,24,23	2	11	10	5	8	0,0,1,1,0,0,1,1,1,1	60	0	0	1	1	3	1	2					0.69897
8	2	11	Fri	GL1	bar0	23	11		11,14,16,24,23	4	5	4	1	0	1,1,1,1	100	1	1	1	0	3	1	2					0
8	2	12	Fri	GL1	bar0	23	2		2,3,7,9,12,15,22,23	7	8	7	1	0	1,1,1,1,1,1,1	100	1	1	1	0	3	1	2					0
8	2	13	Fri	GL1	bar0	23	16		16,24,23	2	3	2	1	0	1,1	100	1	1	1	0	3	1	2					0
8	2	14	Fri	GL1	bar0	23	12		12,9,7,10,13,15,12,9,7,10,13,15,12,19,20,21,22,23	3	18	17	5.66667	14	0,0,1,1,1,0,0,0,1,1,1,0,0,1,1,1,1	58.8235	0	0	1	0	3	1	2					0.753328
8	2	15	Fri	GL1	bar0	23	8		8,5,4,3,7,10,13,16,24,23	5	10	9	1.8	4	0,0,1,1,1,1,1,1,1	77.7778	0	1	1	0	3	1	2					0.255273
8	2	16	Fri	GL1	bar0	23	6		6,17,18,19,20,21,22,23	5	8	7	1.4	2	0,1,1,1,1,1,1	85.7143	0	1	1	0	3	1	2					0.146128
8	2	17	Fri	GL1	bar0	23	11		11,14,16,24,23	4	5	4	1	0	1,1,1,1	100	1	1	1	0	3	1	2					0
8	2	18	Fri	GL1	bar0	23	19		19,18,17,6,9,7,10,13,15,22,21,22,23	4	13	12	3	8	0,0,1,1,0,1,1,1,1,0,1,1	66.6667	0	0	1	0	3	1	2					0.477121
8	2	19	Fri	GL1	bar0	23	1		1,2,3,7,10,13,16,24,23	6	9	8	1.33333	2	0,1,1,1,1,1,1,1	87.5	0	1	1	0	3	1	2					0.124939
8	2	20	Fri	GL1	bar0	23	12		12,15,22,23	3	4	3	1	0	1,1,1	100	1	1	1	0	3	1	2					0
8	2	21	Fri	GL1	bar0	23	17		17,6,9,12,19,20,21,22,23	6	9	8	1.33333	2	1,1,1,0,1,1,1,1	87.5	0	0	1	0	3	1	2					0.124939
8	2	22	Fri	GL1	bar0	23	20	first not eat trial, started being relatively calmer	20,19,12,9,7,10,8,11,14,16,24,23,22	3	12	11	3.66667	8	0,1,0,0,1,0,1,1,1,1,1	63.6364	0	0	0	0	3	1	2					0.564271
8	2	23	Fri	GL1	bar0	23	11		11,14,16,24,23,22	4	5	4	1	0	1,1,1,1	100	1	1	0	0	3	1	2					0
8	2	24	Fri	GL1	bar0	23	7		7,3,4,5,8,10,13,15,22,23,24	5	10	9	1.8	4	0,0,1,1,1,1,1,1,1	77.7778	0	1	0	0	3	1	2					0.255273
8	2	25	Fri	GL1	bar0	23	16	long trial. Seems like hes full	16,13,15,22,23,24	2	5	4	2	2	0,1,1,1	75	0	1	0	0	3	1	2					0.30103
8	2	26	Fri	GL1	bar0	23	1		1,6,17,18,19,20,21,22,23	6	9	8	1.33333	2	1,0,1,1,1,1,1,1	87.5	0	1	1	0	3	1	2					0.124939
8	2	27	Fri	GL1	bar0	23	5		5,4,3,2,1,6,9,12,15,22,23,24	6	11	10	1.66667	4	0,1,0,1,1,1,1,1,1,1	80	0	0	0	0	3	1	2					0.221849
5	3	1	Mon	GL1	bar0	2	10		10,13,16,24,23,22,21,20,19,18,17,6,9,7,10,8,5,4,3,2,1	3	20	19	6.33333	16	0,0,0,0,1,0,1,1,1,1,1,0,1,0,0,1,1,1,1	57.8947	0	0	0	0	3	1	3					0.801632
5	3	2	Mon	GL1	bar0	2	24		24,16,13,10,8,5,4,3,2,1	6	9	8	1.33333	2	1,1,1,0,1,1,1,1	87.5	0	0	0	0	3	1	3					0.124939
5	3	3	Mon	GL1	bar0	2	19		19,20,21,22,15,13,10,7,3,2,1	5	10	9	1.8	4	0,0,1,1,1,1,1,1,1	77.7778	0	1	0	0	3	1	3					0.255273
5	3	4	Mon	GL1	bar0	2	4	circling	4,5,8,11,14,16,24,23,22,21,20,19,18,17,6,1,2,3	2	17	16	8	14	0,0,0,0,1,0,0,1,0,1,1,1,1,1,1,1	56.25	0	0	0	0	3	1	3					0.90309
5	3	5	Mon	GL1	bar0	2	18		18,17,6,9,7,3,2,1	4	7	6	1.5	2	1,1,0,1,1,1	83.3333	0	0	0	0	3	1	3					0.176091
5	3	6	Mon	GL1	bar0	2	11		11,14,16,24,23,22,23,24,16,24,23,22,15,12,9,7,3,2	5	18	17	3.4	12	0,1,0,0,1,0,1,1,0,0,1,1,1,1,1,1,1	64.7059	0	0	1	0	3	1	3					0.531479
5	3	7	Mon	GL1	bar0	2	13		13,16,24,23,22,15,13,10,8,5,4,3,2	4	13	12	3	8	0,0,0,1,1,1,1,0,1,1,1,1	66.6667	0	0	1	0	3	1	3					0.477121
5	3	8	Mon	GL1	bar0	2	6		6,1,2,1	2	3	2	1	0	1,1	100	1	1	0	0	3	1	3					0
5	3	9	Mon	GL1	bar0	2	22		22,23,24,16,13,16,14,11,8,10,7,3,2	6	13	12	2	6	0,1,1,1,0,0,1,1,1,1,1,1	75	0	0	1	0	3	1	3					0.30103
5	3	10	Mon	GL1	bar0	2	7		7,10,8,5,8,10,7,9,12,19,20,21,20,19,12,9,7,3,2	2	19	18	9	16	0,0,1,0,1,1,0,0,0,0,0,1,1,1,1,1,1,1	55.5556	0	0	1	0	3	1	3					0.954243
5	3	11	Mon	GL1	bar0	2	5		5,8,11,14,11,8,10,7,3,2,1	3	10	9	3	6	0,0,0,1,1,1,1,1,1	66.6667	0	0	0	0	3	1	3					0.477121
5	3	12	Mon	GL1	bar0	2	23		23,22,23,24,16,13,15,13,10,8,5,8,10,13,15,22,23,24,16,14,11,8,5,4,3,2,1	7	26	25	3.57143	18	1,0,1,1,1,0,1,1,0,1,0,1,0,0,0,0,1,1,0,1,1,1,1,1,1	64	0	0	0	1	3	1	3					0.552842
5	3	13	Mon	GL1	bar0	2	18		18,17,6,1,2,1	4	5	4	1	0	1,1,1,1	100	1	1	0	0	3	1	3					0
5	3	14	Mon	GL1	bar0	2	13		13,15,22,23,24,16,14,11,8,10,7,3,2,1	4	13	12	3	8	0,0,0,1,1,0,1,1,1,1,1,1	66.6667	0	0	0	0	3	1	3					0.477121
5	3	15	Mon	GL1	bar0	2	9		9,12,19,18,17,6,1,2	3	8	7	2.33333	4	0,0,1,1,1,1,1	71.4286	0	1	1	0	3	1	3					0.367977
5	3	16	Mon	GL1	bar0	2	5		5,8,11,14,16,24,23,22,21,20,19,18,17,6,1,2,3	3	16	15	5	12	0,0,0,1,0,0,1,0,1,1,1,1,1,1,1	60	0	0	0	0	3	1	3					0.69897
6	3	1	Mon	GL1	bar0	10	2		2,1,6,9,7,10,13	3	6	5	1.66667	2	0,1,1,1,1	80	0	1	0	0	3	1	3					0.221849
6	3	2	Mon	GL1	bar0	10	5		5,4,3,2,1,6,17,18,19,20,21,22,23,24,16,14,11,8,10,7	2	19	18	9	16	0,1,0,0,1,0,0,1,0,1,1,0,1,1,0,1,1,1	55.5556	0	0	0	0	3	1	3					0.954243
6	3	3	Mon	GL1	bar0	10	12		12,19,20,21,22,15,13,10,8	3	8	7	2.33333	4	0,0,1,1,1,1,1	71.4286	0	1	0	0	3	1	3					0.367977
6	3	4	Mon	GL1	bar0	10	11		11,8,10,7	2	3	2	1	0	1,1	100	1	1	0	0	3	1	3					0
6	3	5	Mon	GL1	bar0	10	17		17,18,19,12,9,7,10,13	4	7	6	1.5	2	0,1,1,1,1,1	83.3333	0	1	0	0	3	1	3					0.176091
6	3	6	Mon	GL1	bar0	10	23		23,24,23,22,15,13,10,8	4	7	6	1.5	2	1,0,1,1,1,1	83.3333	0	1	0	1	3	1	3					0.176091
6	3	7	Mon	GL1	bar0	10	3		3,4,5,8,10,13	2	5	4	2	2	0,1,1,1	75	0	1	0	0	3	1	3					0.30103
6	3	8	Mon	GL1	bar0	10	15		15,12,19,20,21,22,23,24,16,14,11,8,5,4,3,7,10,13	2	17	16	8	14	0,0,0,1,1,0,1,1,0,1,1,0,0,1,1,1	56.25	0	0	0	0	3	1	3					0.90309
6	3	9	Mon	GL1	bar0	10	4		4,3,2,3,7,10	3	6	5	1.66667	2	1,0,1,1,1	80	0	1	1	1	3	1	3					0.221849
6	3	10	Mon	GL1	bar0	10	21		21,22,23,24,23,22,21,22,15,13,10,8	4	11	10	2.5	6	1,0,1,0,1,0,1,1,1,1	70	0	0	0	0	3	1	3					0.39794
6	3	11	Mon	GL1	bar0	10	6		6,1,2,3,4,5,4,3,2,1,6,9,7,3,2,1,6,9,7,10,8	3	20	19	6.33333	16	0,1,1,0,1,0,1,0,0,1,1,1,0,0,0,1,1,1,1	57.8947	0	0	0	0	3	1	3					0.801632
7	3	1	Mon	GL1	bar0	19	14		14,16,13,10,8,11,14,16,13,15,12,19,18	5	12	11	2.2	6	1,1,0,0,0,1,1,1,1,1,1	72.7273	0	0	0	0	3	1	3					0.342423
7	3	2	Mon	GL1	bar0	19	4		4,3,7,10,13,15,12,19,18	5	8	7	1.4	2	1,1,0,1,1,1,1	85.7143	0	0	0	0	3	1	3					0.146128
7	3	3	Mon	GL1	bar0	19	10		10,8,11,14,16,13,10,7,9,6,17,18,19	4	13	12	3	8	0,0,1,1,1,0,1,1,0,1,1,1	66.6667	0	0	1	0	3	1	3					0.477121
7	3	4	Mon	GL1	bar0	19	17		17,6,1,2,3,7,9,12,15,22,21,20,19	2	13	12	6	10	0,0,0,1,1,1,1,0,0,1,1,1	58.3333	0	0	1	0	3	1	3					0.778151
7	3	5	Mon	GL1	bar0	19	3		3,2,1,6,9,12,19,18	4	7	6	1.5	2	0,1,1,1,1,1	83.3333	0	1	0	0	3	1	3					0.176091
7	3	6	Mon	GL1	bar0	19	22		22,21,20,19	3	4	3	1	0	1,1,1	100	1	1	1	0	3	1	3					0
7	3	7	Mon	GL1	bar0	19	9		9,6,17,18,19,20	2	5	4	2	2	0,1,1,1	75	0	1	0	0	3	1	3					0.30103
7	3	8	Mon	GL1	bar0	19	14		14,16,13,15,12,19	5	6	5	1	0	1,1,1,1,1	100	1	1	1	0	3	1	3					0
7	3	9	Mon	GL1	bar0	19	23		23,22,15,13,10,7,3,4,5,8,11,14,16,24,23,22,21,20,19,12	4	19	18	4.5	14	1,1,0,0,1,0,0,0,1,0,1,1,0,1,1,1,1,1	61.1111	0	0	0	0	3	1	3					0.653213
7	3	10	Mon	GL1	bar0	19	21		21,20,19,18	2	3	2	1	0	1,1	100	1	1	0	0	3	1	3					0
7	3	11	Mon	GL1	bar0	19	7		7,9,12,19,20	3	4	3	1	0	1,1,1	100	1	1	0	0	3	1	3					0
7	3	12	Mon	GL1	bar0	19	1		1,6,17,18,19,20	4	5	4	1	0	1,1,1,1	100	1	1	0	0	3	1	3					0
7	3	13	Mon	GL1	bar0	19	13		13,16,24,23,22,15,12,19	3	8	7	2.33333	4	0,0,1,1,1,1,1	71.4286	0	1	1	0	3	1	3					0.367977
7	3	14	Mon	GL1	bar0	19	4		4,5,8,10,13,15,22,23,22,21,20,19,18	5	12	11	2.2	6	0,1,1,1,1,0,0,1,1,1,1	72.7273	0	0	0	0	3	1	3					0.342423
7	3	15	Mon	GL1	bar0	19	23		23,22,21,20,19	4	5	4	1	0	1,1,1,1	100	1	1	1	0	3	1	3					0
7	3	16	Mon	GL1	bar0	19	9		9,7,10,13,15,12,19	2	7	6	3	4	0,0,1,1,1,1	66.6667	0	1	1	0	3	1	3					0.477121
7	3	17	Mon	GL1	bar0	19	14		14,16,13,10,8,5,8,11,14,16,24,23,22,21,20,19,18	5	16	15	3	10	1,1,0,0,0,1,0,1,1,0,1,1,1,1,1	66.6667	0	0	0	0	3	1	3					0.477121
7	3	18	Mon	GL1	bar0	19	2		2,1,6,9,12,19	5	6	5	1	0	1,1,1,1,1	100	1	1	1	0	3	1	3					0
7	3	19	Mon	GL1	bar0	19	13		13,16,24,23,22,15,12,19	3	8	7	2.33333	4	0,0,1,1,1,1,1	71.4286	0	1	1	0	3	1	3					0.367977
7	3	20	Mon	GL1	bar0	19	21		21,20,19	2	3	2	1	0	1,1	100	1	1	1	0	3	1	3					0
7	3	21	Mon	GL1	bar0	19	10		10,13,15,22,21,20,19	4	7	6	1.5	2	1,1,0,1,1,1	83.3333	0	0	1	0	3	1	3					0.176091
8	3	1	Mon	GL1	bar0	23	9		9,6,1,2,3,7,9,12,19,20,21,22,23	4	13	12	3	8	0,0,0,1,1,1,1,0,1,1,1,1	66.6667	0	0	1	0	3	1	3					0.477121
8	3	2	Mon	GL1	bar0	23	11		11,14,16,24,23,22	4	5	4	1	0	1,1,1,1	100	1	1	0	0	3	1	3					0
8	3	3	Mon	GL1	bar0	23	18		18,17,6,9,7,10,13,16,24,23	5	10	9	1.8	4	0,1,1,0,1,1,1,1,1	77.7778	0	0	1	0	3	1	3					0.255273
8	3	4	Mon	GL1	bar0	23	1		1,6,9,12,19,20,21,22,23	6	9	8	1.33333	2	1,1,1,0,1,1,1,1	87.5	0	0	1	0	3	1	3					0.124939
8	3	5	Mon	GL1	bar0	23	21		21,22,23	2	3	2	1	0	1,1	100	1	1	1	0	3	1	3					0
8	3	6	Mon	GL1	bar0	23	10		10,7,3,4,5,8,11,14,16,24,23,22	4	11	10	2.5	6	0,0,0,1,1,1,1,1,1,1	70	0	0	0	0	3	1	3					0.39794
8	3	7	Mon	GL1	bar0	23	6		6,17,18,19,20,21,22,23	5	8	7	1.4	2	0,1,1,1,1,1,1	85.7143	0	1	1	0	3	1	3					0.146128
8	3	8	Mon	GL1	bar0	23	16		16,24,23	2	3	2	1	0	1,1	100	1	1	1	0	3	1	3					0
8	3	9	Mon	GL1	bar0	23	4		4,5,8,10,13,15,22,23	7	8	7	1	0	1,1,1,1,1,1,1	100	1	1	1	0	3	1	3					0
8	3	10	Mon	GL1	bar0	23	9		9,12,19,20,21,22,23	4	7	6	1.5	2	1,0,1,1,1,1	83.3333	0	1	1	0	3	1	3					0.176091
8	3	11	Mon	GL1	bar0	23	11	circled	11,8,5,4,3,2,1,6,17,18,19,20,21,22,23	4	15	14	3.5	10	0,0,0,1,0,1,1,0,1,1,1,1,1,1	64.2857	0	0	1	0	3	1	3					0.544068
8	3	12	Mon	GL1	bar0	23	19		19,18,17,6,9,12,15,22,23	4	9	8	2	4	0,0,1,1,1,1,1,1	75	0	1	1	0	3	1	3					0.30103
8	3	13	Mon	GL1	bar0	23	1		1,6,9,12,15,22,23	6	7	6	1	0	1,1,1,1,1,1	100	1	1	1	0	3	1	3					0
8	3	14	Mon	GL1	bar0	23	15		15,12,9,6,9,12,19,20,21,22,23	2	11	10	5	8	0,0,0,1,1,0,1,1,1,1	60	0	0	1	0	3	1	3					0.69897
8	3	15	Mon	GL1	bar0	23	18		18,19,12,15,22,23	5	6	5	1	0	1,1,1,1,1	100	1	1	1	0	3	1	3					0
8	3	16	Mon	GL1	bar0	23	14		14,16,13,10,8,5,4,3,2,1,6,17,18,19,20,21,22,23,24	3	18	17	5.66667	14	1,0,0,0,0,0,1,0,1,1,0,1,1,1,1,1,1	58.8235	0	0	0	0	3	1	3					0.753328
8	3	17	Mon	GL1	bar0	23	1		1,2,3,4,5,8,11,14,16,13,15,22,23,24	6	13	12	2	6	0,1,0,1,1,1,1,1,0,1,1,1	75	0	0	0	0	3	1	3					0.30103
8	3	18	Mon	GL1	bar0	23	8	just circled	8,5,4,3,2,1,6,17,18,19,20,21,22,23	5	14	13	2.6	8	0,0,1,0,1,1,0,1,1,1,1,1,1	69.2308	0	0	1	0	3	1	3					0.414973
8	3	19	Mon	GL1	bar0	23	12		12,19,20,21,22,23	3	6	5	1.66667	2	0,1,1,1,1	80	0	1	1	0	3	1	3					0.221849
8	3	20	Mon	GL1	bar0	23	11	very long trial. Clapped my hand cause mouse was hung upp on a certain corner for too long.	11,8,5,4,3,2,1,6,17,18,19,12,15,22,23,24	4	15	14	3.5	10	0,0,0,1,0,1,1,0,1,1,1,1,1,1	64.2857	0	0	0	0	3	1	3					0.544068
8	3	21	Mon	GL1	bar0	23	2		2,3,7,9,12,15,22,21,22,23,22	7	10	9	1.28571	2	1,1,1,1,1,1,0,1,1	88.8889	0	0	0	0	3	1	3					0.109144
8	3	22	Mon	GL1	bar0	23	20		20,19,12,15,22,23	3	6	5	1.66667	2	0,1,1,1,1	80	0	1	1	0	3	1	3					0.221849
8	3	23	Mon	GL1	bar0	23	16		16,14,11,8,10,7,9,12,19,20,21,22,23,24	2	13	12	6	10	0,0,0,1,0,1,1,0,1,1,1,1	58.3333	0	0	0	0	3	1	3					0.778151
5	4	1	Wed	GL1	bar0	2	18		18,17,6,9,7,3,4,5,8,11,14,16,24,23,22,21,20,19,12,15,22,23,24,16,14,11,8,5,4,3,2	4	31	30	7.5	26	1,1,0,1,1,0,0,0,0,0,1,0,0,1,0,1,1,1,0,0,0,1,1,0,1,1,1,1,1,1	56.6667	0	0	1	0	3	1	4					0.875061
5	4	2	Wed	GL1	bar0	2	15		15,22,23,24,16,13,10,7,3,2	5	10	9	1.8	4	0,0,1,1,1,1,1,1,1	77.7778	0	1	1	0	3	1	4					0.255273
5	4	3	Wed	GL1	bar0	2	4		4,5,8,11,14,16,13,15,12,9,6,1,2	2	13	12	6	10	0,0,0,0,1,1,0,1,1,1,1,1	58.3333	0	0	1	0	3	1	4					0.778151
5	4	4	Wed	GL1	bar0	2	24		24,23,22,21,20,19,18,17,6,1,2	6	11	10	1.66667	4	0,1,0,1,1,1,1,1,1,1	80	0	0	1	0	3	1	4					0.221849
5	4	5	Wed	GL1	bar0	2	20		20,19,18,17,6,1,2	6	7	6	1	0	1,1,1,1,1,1	100	1	1	1	0	3	1	4					0
5	4	6	Wed	GL1	bar0	2	10		10,8,11,14,16,24,23,22,21,20,21,20,19,18,17,6,1,2	3	18	17	5.66667	14	0,0,0,1,0,0,1,0,1,0,1,1,1,1,1,1,1	58.8235	0	0	1	0	3	1	4					0.753328
5	4	7	Wed	GL1	bar0	2	18		18,17,6,9,7,3,2	4	7	6	1.5	2	1,1,0,1,1,1	83.3333	0	0	1	0	3	1	4					0.176091
5	4	8	Wed	GL1	bar0	2	11		11,8,10,13,16,24,23,22,21,20,21,22,23,24,16,13,15,12,19,18,19,20,21,22,23,24,16,14,11,8,5,4,3,2	5	34	33	6.6	28	1,1,0,0,0,0,1,0,1,0,1,0,1,1,1,0,1,0,1,0,0,0,1,0,1,1,0,1,1,1,1,1,1	57.5758	0	0	1	0	3	1	4					0.819544
5	4	9	Wed	GL1	bar0	2	13		13,15,22,23,24,16,14,11,8,5,4,3,2	4	13	12	3	8	0,0,0,1,1,0,1,1,1,1,1,1	66.6667	0	0	1	0	3	1	4					0.477121
5	4	10	Wed	GL1	bar0	2	4		4,5,8,10,8,10,7,9,12,19,20,21,22,23,24,16,14,11,8,5,4,3,2	2	23	22	11	20	0,0,1,0,1,1,0,0,0,0,0,1,0,1,1,0,1,1,1,1,1,1	54.5455	0	0	1	0	3	1	4					1.04139
5	4	11	Wed	GL1	bar0	2	12		12,19,18,17,6,1,2	4	7	6	1.5	2	0,1,1,1,1,1	83.3333	0	1	1	0	3	1	4					0.176091
5	4	12	Wed	GL1	bar0	2	16	IB: going back and forth at nodes 21,20,19. Happened before as well.	16,24,23,24,16,14,11,8,10,7,9,6,17,18,19,20,19,12,15,22,23,22,21,20,19,20,19,18,17,6,1,2	5	32	31	6.2	26	0,0,1,1,0,1,1,1,1,0,1,0,0,0,0,1,1,0,0,0,1,0,1,1,0,1,1,1,1,1,1	58.0645	0	0	1	1	3	1	4					0.792392
5	4	13	Wed	GL1	bar0	2	4		4,5,4,3,2	2	5	4	2	2	0,1,1,1	75	0	1	1	1	3	1	4					0.30103
5	4	14	Wed	GL1	bar0	2	11		11,14,16,13,15,22,21,20,19,18,17,6,1,2,3	5	14	13	2.6	8	0,1,1,0,0,0,1,1,1,1,1,1,1	69.2308	0	0	0	0	3	1	4					0.414973
5	4	15	Wed	GL1	bar0	2	13		13,16,14,11,8,10,7,3,2,1	4	9	8	2	4	0,0,1,1,1,1,1,1	75	0	1	0	0	3	1	4					0.30103
5	4	16	Wed	GL1	bar0	2	6	IB at 18:30. Rear then DR.	6,1,2,3	2	3	2	1	0	1,1	100	1	1	0	0	3	1	4					0
5	4	17	Wed	GL1	bar0	2	23		23,22,21,20,21,22,21,20,21,22,15,13,10,8,5,4,3,2,1	7	18	17	2.42857	10	1,0,1,0,1,0,1,0,1,1,1,1,0,1,1,1,1	70.5882	0	0	0	0	3	1	4					0.385351
5	4	18	Wed	GL1	bar0	2	7		7,10,7,3,2,1	2	5	4	2	2	0,1,1,1	75	0	1	0	1	3	1	4					0.30103
5	4	19	Wed	GL1	bar0	2	21		21,20,19,18,17,6,1,2	7	8	7	1	0	1,1,1,1,1,1,1	100	1	1	1	0	3	1	4					0
5	4	20	Wed	GL1	bar0	2	5		5,8,11,8,5,4,3,2	3	8	7	2.33333	4	0,0,1,1,1,1,1	71.4286	0	1	1	1	3	1	4					0.367977
5	4	21	Wed	GL1	bar0	2	10		10,8,11,8,10,7,3,2,1	3	8	7	2.33333	4	0,0,1,1,1,1,1	71.4286	0	1	0	1	3	1	4					0.367977
5	4	22	Wed	GL1	bar0	2	18	ate at 21	18,17,6,1,2,3	4	5	4	1	0	1,1,1,1	100	1	1	0	0	3	1	4					0
5	4	23	Wed	GL1	bar0	2	14		14,16,24,23,22,15,12,19,20,21,22,23,24,16,14,11,8,5,4,3,2,3	6	21	20	3.33333	14	1,0,0,1,1,1,0,0,0,1,0,1,1,0,1,1,1,1,1,1	65	0	0	0	0	3	1	4					0.522879
5	4	24	Wed	GL1	bar0	2	7		7,9,6,1,2,3	2	5	4	2	2	0,1,1,1	75	0	1	0	0	3	1	4					0.30103
6	4	1	Wed	GL1	bar0	10	21	circle	21,22,23,24,16,14,11,8,5,4,3,2,1,6,17,18,19,20,21,22,23,24,16,13,15,12,19,18,17,6,9,12,15,22,21,20,19,12,15,22,23,24,16,13,10	4	45	44	11	40	1,0,1,1,0,1,1,0,0,1,0,0,1,0,0,1,0,1,1,0,1,1,1,0,0,0,0,1,1,1,0,1,0,0,0,1,1,1,0,0,1,1,1,1	54.5455	0	0	1	0	3	1	4					1.04139
6	4	2	Wed	GL1	bar0	10	2		2,1,6,17,18,19,20,21,22,23,24,16,13,10	3	14	13	4.33333	10	0,1,0,0,1,0,1,1,0,1,1,1,1	61.5385	0	0	1	0	3	1	4					0.636822
6	4	3	Wed	GL1	bar0	10	9		9,6,17,18,19,20,21,22,15,13,10	2	11	10	5	8	0,0,0,1,0,1,1,1,1,1	60	0	0	1	0	3	1	4					0.69897
6	4	4	Wed	GL1	bar0	10	23		23,24,16,14,11,8,10	4	7	6	1.5	2	1,1,0,1,1,1	83.3333	0	0	1	0	3	1	4					0.176091
6	4	5	Wed	GL1	bar0	10	17		17,18,19,12,15,13,16,24,23,22,21,20,19,12,15,13,10,8	4	17	16	4	12	0,1,1,1,1,0,0,0,1,0,0,1,1,1,1,1	62.5	0	0	0	0	3	1	4					0.60206
6	4	6	Wed	GL1	bar0	10	11	Climbed 4-1 and 9-12	11,8,10,7	2	3	2	1	0	1,1	100	1	1	0	0	3	1	4					0
6	4	7	Wed	GL1	bar0	10	19		19,18,17,6,9,7,10	4	7	6	1.5	2	0,1,1,1,1,1	83.3333	0	1	1	0	3	1	4					0.176091
6	4	8	Wed	GL1	bar0	10	22		22,23,24,16,13,10,8	3	6	5	1.66667	2	0,1,1,1,1	80	0	1	0	0	3	1	4					0.221849
6	4	9	Wed	GL1	bar0	10	3		3,4,5,8,11,14,16,24,23,22,21,20,21,22,23,24,23,22,15,13,10	2	21	20	10	18	0,1,1,0,0,1,0,0,1,0,0,1,1,0,1,0,1,1,1,1	55	0	0	1	0	3	1	4					1
6	4	10	Wed	GL1	bar0	10	12		12,19,18,17,6,9,7,3,2,3,4,5,8,11,14,16,13,10	3	18	17	5.66667	14	0,0,1,1,1,1,0,0,1,0,1,1,0,0,1,1,1	58.8235	0	0	1	0	3	1	4					0.753328
6	4	11	Wed	GL1	bar0	10	5		5,4,3,7,10,8	2	5	4	2	2	0,1,1,1	75	0	1	0	0	3	1	4					0.30103
6	4	12	Wed	GL1	bar0	10	16		16,24,23,22,15,13,10	2	7	6	3	4	0,0,1,1,1,1	66.6667	0	1	1	0	3	1	4					0.477121
6	4	13	Wed	GL1	bar0	10	1		1,6,17,18,19,12,15,13,16,14,11,8,5,4,5,8,10	4	17	16	4	12	1,0,0,1,1,1,1,0,0,1,1,0,0,1,1,1	62.5	0	0	1	0	3	1	4					0.60206
6	4	14	Wed	GL1	bar0	10	22		22,23,24,16,13,10,7	3	6	5	1.66667	2	0,1,1,1,1	80	0	1	0	0	3	1	4					0.221849
6	4	15	Wed	GL1	bar0	10	3		3,4,5,8,11,14,16,24,23,22,15,12,19,18,17,18,17,6,9,7,10,8	2	21	20	10	18	0,1,1,0,0,1,0,0,1,1,0,0,0,1,0,1,1,1,1,1	55	0	0	0	0	3	1	4					1
6	4	16	Wed	GL1	bar0	10	19		19,18,17,6,1,2,1,6,17,18,19,12,9,7,10,13	4	15	14	3.5	10	0,1,1,0,1,0,1,0,0,1,1,1,1,1	64.2857	0	0	0	0	3	1	4					0.544068
6	4	17	Wed	GL1	bar0	10	5		5,8,10,7	2	3	2	1	0	1,1	100	1	1	0	0	3	1	4					0
6	4	18	Wed	GL1	bar0	10	24		24,23,22,21,20,19,18,17,6,1,2,3,7,10,8	3	14	13	4.33333	10	0,1,0,0,1,0,1,1,0,1,1,1,1	61.5385	0	0	0	0	3	1	4					0.636822
6	4	19	Wed	GL1	bar0	10	18		18,17,6,9,7,10,8	5	6	5	1	0	1,1,1,1,1	100	1	1	0	0	3	1	4					0
7	4	1	Wed	GL1	bar0	19	4		4,5,8,10,7,9,12,15,13,16,14,11,8,10,13,15,22,23,24,16,14,11,8,10,13,15,12,19	5	28	27	5.4	22	0,1,1,1,1,1,0,0,0,0,0,1,1,1,1,0,0,0,1,0,0,1,1,1,1,1,1	59.2593	0	0	1	0	3	1	4					0.732394
7	4	2	Wed	GL1	bar0	19	16		16,24,23,22,15,12,19,20	4	7	6	1.5	2	0,1,1,1,1,1	83.3333	0	1	0	0	3	1	4					0.176091
7	4	3	Wed	GL1	bar0	19	21		21,22,15,12,9,6,1,2,3,7,10,13,16,14,11,8,5,4,3,2,1,6,9,12,19	2	25	24	12	22	0,1,1,0,0,0,0,1,1,0,1,0,0,0,1,0,1,1,0,1,1,1,1,1	54.1667	0	0	1	0	3	1	4					1.07918
7	4	4	Wed	GL1	bar0	19	8		8,11,14,16,24,23,22,21,20,19	5	10	9	1.8	4	0,1,1,0,1,1,1,1,1	77.7778	0	0	1	0	3	1	4					0.255273
7	4	5	Wed	GL1	bar0	19	17		17,6,9,12,19	2	5	4	2	2	0,1,1,1	75	0	1	1	0	3	1	4					0.30103
7	4	6	Wed	GL1	bar0	19	10		10,8,11,14,16,13,15,12,19,18	4	9	8	2	4	0,0,1,1,1,1,1,1	75	0	1	0	0	3	1	4					0.30103
7	4	7	Wed	GL1	bar0	19	21		21,22,15,12,19	2	5	4	2	2	0,1,1,1	75	0	1	1	0	3	1	4					0.30103
7	4	8	Wed	GL1	bar0	19	3		3,2,1,6,9,12,19	4	7	6	1.5	2	0,1,1,1,1,1	83.3333	0	1	1	0	3	1	4					0.176091
7	4	9	Wed	GL1	bar0	19	10		10,7,9,12,15,22,23,24,16,14,11,8,5,4,3,2,1,6,17,18,19	4	21	20	5	16	1,1,1,0,0,0,0,1,0,0,1,0,1,1,0,1,1,1,1,1	60	0	0	1	0	3	1	4					0.69897
7	4	10	Wed	GL1	bar0	19	17		17,6,9,12,15,22,23,24,23,22,23,22,21,20,19,12	2	15	14	7	12	0,1,1,0,0,0,0,1,1,0,1,1,1,1	57.1429	0	0	0	0	3	1	4					0.845098
7	4	11	Wed	GL1	bar0	19	7		7,9,12,9,6,1,2,3,7,10,13,16,24,23,22,21,20,19	3	18	17	5.66667	14	1,1,0,0,0,0,1,1,0,1,0,0,1,1,1,1,1	58.8235	0	0	1	1	3	1	4					0.753328
7	4	12	Wed	GL1	bar0	19	24		24,16,14,11,8,10,13,15,22,21,20,19	5	12	11	2.2	6	1,0,0,1,1,1,1,0,1,1,1	72.7273	0	0	1	0	3	1	4					0.342423
7	4	13	Wed	GL1	bar0	19	4		4,5,4,3,2,1,6,17,18,19	5	10	9	1.8	4	0,1,1,0,1,1,1,1,1	77.7778	0	0	1	1	3	1	4					0.255273
7	4	14	Wed	GL1	bar0	19	9		9,6,17,18,19	2	5	4	2	2	0,1,1,1	75	0	1	1	0	3	1	4					0.30103
7	4	15	Wed	GL1	bar0	19	11		11,14,16,24,16,13,15,22,21,20,19,12	6	11	10	1.66667	4	1,1,0,1,1,1,0,1,1,1	80	0	0	0	0	3	1	4					0.221849
7	4	16	Wed	GL1	bar0	19	15		15,13,10,8,5,4,3,2,1,6,17,18,19,20	2	13	12	6	10	0,0,0,0,1,1,0,1,1,1,1,1	58.3333	0	0	0	0	3	1	4					0.778151
7	4	17	Wed	GL1	bar0	19	3		3,4,3,7,9,12,19	4	7	6	1.5	2	0,1,1,1,1,1	83.3333	0	1	1	1	3	1	4					0.176091
7	4	18	Wed	GL1	bar0	19	23		23,22,21,20,19	4	5	4	1	0	1,1,1,1	100	1	1	1	0	3	1	4					0
7	4	19	Wed	GL1	bar0	19	16	long trial, distracted.	16,24,23,22,15,12,19,18	4	7	6	1.5	2	0,1,1,1,1,1	83.3333	0	1	0	0	3	1	4					0.176091
7	4	20	Wed	GL1	bar0	19	21		21,20,19,12	2	3	2	1	0	1,1	100	1	1	0	0	3	1	4					0
7	4	21	Wed	GL1	bar0	19	7		7,3,2,1,6,17,18,19	3	8	7	2.33333	4	0,0,1,1,1,1,1	71.4286	0	1	1	0	3	1	4					0.367977
7	4	22	Wed	GL1	bar0	19	17		17,18,19,12	2	3	2	1	0	1,1	100	1	1	0	0	3	1	4					0
8	4	1	Wed	GL1	bar0	23	20		20,21,22,23	3	4	3	1	0	1,1,1	100	1	1	1	0	3	1	4					0
8	4	2	Wed	GL1	bar0	23	11		11,8,5,4,3,2,1,6,17,18,19,20,21,22,23	4	15	14	3.5	10	0,0,0,1,0,1,1,0,1,1,1,1,1,1	64.2857	0	0	1	0	3	1	4					0.544068
8	4	3	Wed	GL1	bar0	23	17		17,18,19,20,21,22,23	6	7	6	1	0	1,1,1,1,1,1	100	1	1	1	0	3	1	4					0
8	4	4	Wed	GL1	bar0	23	9		9,6,17,18,19,20,21,22,23	4	9	8	2	4	0,0,1,1,1,1,1,1	75	0	1	1	0	3	1	4					0.30103
8	4	5	Wed	GL1	bar0	23	16		16,14,11,8,5,4,3,7,9,12,19,20,21,22,23	2	15	14	7	12	0,0,0,0,0,1,1,1,1,0,1,1,1,1	57.1429	0	0	1	0	3	1	4					0.845098
8	4	6	Wed	GL1	bar0	23	3		3,4,5,8,11,14,16,24,23	6	9	8	1.33333	2	0,1,1,1,1,1,1,1	87.5	0	1	1	0	3	1	4					0.124939
8	4	7	Wed	GL1	bar0	23	20		20,21,22,23	3	4	3	1	0	1,1,1	100	1	1	1	0	3	1	4					0
8	4	8	Wed	GL1	bar0	23	1		1,2,3,7,10,13,15,22,21,20,19,18,17,6,1,2,1,6,17,18,19,20,21,22,23	6	25	24	4	18	0,1,1,1,1,1,1,0,0,0,0,0,1,0,0,1,1,0,1,1,1,1,1,1	62.5	0	0	1	0	3	1	4					0.60206
8	4	9	Wed	GL1	bar0	23	12		12,15,13,16,24,23	3	6	5	1.66667	2	1,0,1,1,1	80	0	1	1	0	3	1	4					0.221849
8	4	10	Wed	GL1	bar0	23	10		10,7,3,4,5,8,11,14,16,24,23	4	11	10	2.5	6	0,0,0,1,1,1,1,1,1,1	70	0	0	1	0	3	1	4					0.39794
8	4	11	Wed	GL1	bar0	23	11		11,14,16,24,23,22	4	5	4	1	0	1,1,1,1	100	1	1	0	0	3	1	4					0
8	4	12	Wed	GL1	bar0	23	17		17,6,9,7,10,8,5,4,3,7,9,12,15,22,23	6	15	14	2.33333	8	1,1,0,1,0,0,0,1,1,1,1,1,1,1	71.4286	0	0	1	0	3	1	4					0.367977
8	4	13	Wed	GL1	bar0	23	16		16,24,23	2	3	2	1	0	1,1	100	1	1	1	0	3	1	4					0
8	4	14	Wed	GL1	bar0	23	20		20,21,22,23	3	4	3	1	0	1,1,1	100	1	1	1	0	3	1	4					0
8	4	15	Wed	GL1	bar0	23	8		8,5,4,3,7,9,12,19,20,21,22,23	5	12	11	2.2	6	0,0,1,1,1,1,0,1,1,1,1	72.7273	0	0	1	0	3	1	4					0.342423
8	4	16	Wed	GL1	bar0	23	9		9,7,10,13,15,22,21,20,19,18,17,6,1,2,3,7,10,13,16,24,23	4	21	20	5	16	0,1,1,1,1,0,0,0,0,0,1,0,0,1,1,1,1,1,1,1	60	0	0	1	0	3	1	4					0.69897
8	4	17	Wed	GL1	bar0	23	14		14,11,8,10,13,15,22,21,20,19,18,17,6,9,12,15,13,16,24,23	3	20	19	6.33333	16	0,0,1,1,1,1,0,0,0,0,0,1,1,1,1,0,1,1,1	57.8947	0	0	1	0	3	1	4					0.801632
8	4	18	Wed	GL1	bar0	23	3		3,7,10,13,16,24,23	6	7	6	1	0	1,1,1,1,1,1	100	1	1	1	0	3	1	4					0
8	4	19	Wed	GL1	bar0	23	20		20,19,12,9,12,15,22,23	3	8	7	2.33333	4	0,1,0,1,1,1,1	71.4286	0	0	1	0	3	1	4					0.367977
8	4	20	Wed	GL1	bar0	23	14		14,16,24,23,22	3	4	3	1	0	1,1,1	100	1	1	0	0	3	1	4					0
8	4	21	Wed	GL1	bar0	23	7		7,3,4,5,8,10,7,3,2,1,6,17,18,19,20,21,22,23,24	5	18	17	3.4	12	0,0,1,1,1,0,0,0,1,1,0,1,1,1,1,1,1	64.7059	0	0	0	0	3	1	4					0.531479
8	4	22	Wed	GL1	bar0	23	12		12,19,20,21,22,23,24	3	6	5	1.66667	2	0,1,1,1,1	80	0	1	0	0	3	1	4					0.221849
8	4	23	Wed	GL1	bar0	23	21		21,20,21,22,23	2	5	4	2	2	0,1,1,1	75	0	1	1	1	3	1	4					0.30103
8	4	24	Wed	GL1	bar0	23	5		5,4,3,2,1,6,17,18,19,20,21,22,23,22	6	13	12	2	6	0,1,0,1,1,0,1,1,1,1,1,1	75	0	0	0	0	3	1	4					0.30103
8	4	25	Wed	GL1	bar0	23	6		6,17,18,19,20,21,22,23,24	5	8	7	1.4	2	0,1,1,1,1,1,1	85.7143	0	1	0	0	3	1	4					0.146128
8	4	26	Wed	GL1	bar0	23	11		11,8,10,13,15,22,23	4	7	6	1.5	2	0,1,1,1,1,1	83.3333	0	1	1	0	3	1	4					0.176091
8	4	27	Wed	GL1	bar0	23	18		18,19,20,21,22,23,24	5	6	5	1	0	1,1,1,1,1	100	1	1	0	0	3	1	4					0
8	4	28	Wed	GL1	bar0	23	9		9,12,15,22,21,20,19,18,17,6,9,12,15,22,23	4	15	14	3.5	10	1,1,1,0,0,0,0,0,1,1,1,1,1,1	64.2857	0	0	1	0	3	1	4					0.544068
8	4	29	Wed	GL1	bar0	23	16		16,24,23	2	3	2	1	0	1,1	100	1	1	1	0	3	1	4					0
8	4	30	Wed	GL1	bar0	23	12		12,19,20,21,22,23	3	6	5	1.66667	2	0,1,1,1,1	80	0	1	1	0	3	1	4					0.221849
5	5	1	Fri	GL1	bar0	2	24		24,23,22,21,20,19,18,17,6,1,2	6	11	10	1.66667	4	0,1,0,1,1,1,1,1,1,1	80	0	0	1	0	3	1	5					0.221849
5	5	2	Fri	GL1	bar0	2	19	circled	19,20,21,22,23,24,16,14,11,8,5,4,3,2	5	14	13	2.6	8	0,0,1,0,1,1,0,1,1,1,1,1,1	69.2308	0	0	1	0	3	1	5					0.414973
5	5	3	Fri	GL1	bar0	2	4	circled	4,5,8,11,14,16,24,23,22,21,20,19,18,17,6,1,2	2	17	16	8	14	0,0,0,0,1,0,0,1,0,1,1,1,1,1,1,1	56.25	0	0	1	0	3	1	5					0.90309
5	5	4	Fri	GL1	bar0	2	13		13,15,12,9,6,1,2	4	7	6	1.5	2	0,1,1,1,1,1	83.3333	0	1	1	0	3	1	5					0.176091
5	5	5	Fri	GL1	bar0	2	22		22,15,13,16,24,23,22,21,20,19,18,17,6,1,2	6	15	14	2.33333	8	1,1,0,0,0,1,0,1,1,1,1,1,1,1	71.4286	0	0	1	0	3	1	5					0.367977
5	5	6	Fri	GL1	bar0	2	17		17,6,1,2	3	4	3	1	0	1,1,1	100	1	1	1	0	3	1	5					0
5	5	7	Fri	GL1	bar0	2	5	IB at 5	5,8,11,8,5,4,3,2	3	8	7	2.33333	4	0,0,1,1,1,1,1	71.4286	0	1	1	1	3	1	5					0.367977
5	5	8	Fri	GL1	bar0	2	9	circled largely	9,12,19,20,21,22,23,24,16,14,11,8,5,4,3,2	3	16	15	5	12	0,0,0,0,1,0,1,1,0,1,1,1,1,1,1	60	0	0	1	0	3	1	5					0.69897
5	5	9	Fri	GL1	bar0	2	13		13,15,22,23,24,16,14,11,8,5,4,3,2	4	13	12	3	8	0,0,0,1,1,0,1,1,1,1,1,1	66.6667	0	0	1	0	3	1	5					0.477121
5	5	10	Fri	GL1	bar0	2	7		7,3,2	2	3	2	1	0	1,1	100	1	1	1	0	3	1	5					0
5	5	11	Fri	GL1	bar0	2	24		24,23,22,21,20,19,18,17,6,1,2	6	11	10	1.66667	4	0,1,0,1,1,1,1,1,1,1	80	0	0	1	0	3	1	5					0.221849
5	5	12	Fri	GL1	bar0	2	18		18,17,6,1,2	4	5	4	1	0	1,1,1,1	100	1	1	1	0	3	1	5					0
5	5	13	Fri	GL1	bar0	2	5		5,8,11,14,16,24,23,22,21,20,19,18,19,12,9,6,17,18,19,20,21,22,23,24,16,14,11,8,5,4,3,2,1	3	32	31	10.3333	28	0,0,0,1,0,0,1,0,1,1,1,0,1,1,1,0,0,0,0,0,1,0,1,1,0,1,1,1,1,1,1	54.8387	0	0	0	0	3	1	5					1.01424
5	5	14	Fri	GL1	bar0	2	21		21,20,19,18,17,6,1,2,3	7	8	7	1	0	1,1,1,1,1,1,1	100	1	1	0	0	3	1	5					0
5	5	15	Fri	GL1	bar0	2	17		17,6,9,12,15,22,15,13,16,24,23,22,15,12,9,7,3,2	3	18	17	5.66667	14	1,0,0,0,0,1,1,0,0,0,1,1,1,1,1,1,1	58.8235	0	0	1	0	3	1	5					0.753328
5	5	16	Fri	GL1	bar0	2	13		13,15,22,23,24,16,14,11,8,5,4,3,2	4	13	12	3	8	0,0,0,1,1,0,1,1,1,1,1,1	66.6667	0	0	1	0	3	1	5					0.477121
5	5	17	Fri	GL1	bar0	2	11		11,14,11,8,5,4,3,2	5	8	7	1.4	2	0,1,1,1,1,1,1	85.7143	0	1	1	1	3	1	5					0.146128
5	5	18	Fri	GL1	bar0	2	6		6,9,7,10,8,5,4,3,2	2	9	8	4	6	0,1,0,0,1,1,1,1	62.5	0	0	1	0	3	1	5					0.60206
5	5	19	Fri	GL1	bar0	2	13		13,15,12,19,18,19,20,19,18,17,6,1,2	4	13	12	3	8	0,1,0,1,0,0,1,1,1,1,1,1	66.6667	0	0	1	0	3	1	5					0.477121
5	5	20	Fri	GL1	bar0	2	20		20,19,12,9,7,3,2	6	7	6	1	0	1,1,1,1,1,1	100	1	1	1	0	3	1	5					0
5	5	21	Fri	GL1	bar0	2	7	IB: at 18, very clear usa of middle cue	7,3,2,3	2	3	2	1	0	1,1	100	1	1	0	0	3	1	5					0
5	5	22	Fri	GL1	bar0	2	16		16,24,23,22,15,12,9,6,1,2	5	10	9	1.8	4	0,0,1,1,1,1,1,1,1	77.7778	0	1	1	0	3	1	5					0.255273
5	5	23	Fri	GL1	bar0	2	12		12,9,7,3,2	4	5	4	1	0	1,1,1,1	100	1	1	1	0	3	1	5					0
5	5	24	Fri	GL1	bar0	2	5		5,8,11,8,10,7,9,6,17,18,19,20,21,22,23,24,16,14,11,8,10,7,9,6,1,2	3	26	25	8.33333	22	0,0,1,1,1,0,1,0,0,0,0,0,1,0,1,1,0,1,1,1,1,0,1,1,1	56	0	0	1	1	3	1	5					0.920819
5	5	25	Fri	GL1	bar0	2	6		6,9,7,3,2	2	5	4	2	2	0,1,1,1	75	0	1	1	0	3	1	5					0.30103
5	5	26	Fri	GL1	bar0	2	15		15,22,21,20,19,18,17,18,17,6,1,2	5	12	11	2.2	6	0,0,1,1,1,1,0,1,1,1,1	72.7273	0	0	1	0	3	1	5					0.342423
5	5	27	Fri	GL1	bar0	2	18		18,19,12,15,13,16,14,11,8,5,8,11,14,16,24,23,22,21,20,21,22,23,24,16,14,11,8,5,4,3,2	4	31	30	7.5	26	0,1,0,1,0,0,1,1,1,0,0,0,1,0,0,1,0,1,0,1,0,1,1,0,1,1,1,1,1,1	56.6667	0	0	1	0	3	1	5					0.875061
5	5	28	Fri	GL1	bar0	2	24		24,16,14,11,8,5,4,3,2	6	9	8	1.33333	2	1,0,1,1,1,1,1,1	87.5	0	1	1	0	3	1	5					0.124939
5	5	29	Fri	GL1	bar0	2	20		20,19,18,17,6,9,7,3,2,1	6	9	8	1.33333	2	1,1,1,1,0,1,1,1	87.5	0	0	0	0	3	1	5					0.124939
5	5	30	Fri	GL1	bar0	2	4		4,3,2,1	2	3	2	1	0	1,1	100	1	1	0	0	3	1	5					0
5	5	31	Fri	GL1	bar0	2	13		13,16,24,23,22,15,12,9,6,1,2	4	11	10	2.5	6	0,0,0,1,1,1,1,1,1,1	70	0	0	1	0	3	1	5					0.39794
5	5	32	Fri	GL1	bar0	2	22		22,15,12,9,7,3,4,3,2	6	9	8	1.33333	2	1,1,1,1,1,0,1,1	87.5	0	0	1	0	3	1	5					0.124939
5	5	33	Fri	GL1	bar0	2	17		17,6,9,12,15,22,23,24,16,14,16,24,16,14,11,8,5,4,3,2	3	20	19	6.33333	16	1,0,0,0,0,0,1,1,0,1,0,1,0,1,1,1,1,1,1	57.8947	0	0	1	0	3	1	5					0.801632
6	5	1	Fri	GL1	bar0	10	24		24,16,14,11,8,5,4,3,2,1,6,9,12,15,22,23,24,16,13,10	3	20	19	6.33333	16	1,0,1,1,0,0,1,0,0,1,1,0,1,0,0,1,1,1,1	57.8947	0	0	1	0	3	1	5					0.801632
6	5	2	Fri	GL1	bar0	10	6	circle till cut through	6,17,18,19,20,21,22,23,24,16,14,11,8,10	3	14	13	4.33333	10	0,0,1,0,1,1,0,1,1,0,1,1,1	61.5385	0	0	1	0	3	1	5					0.636822
6	5	3	Fri	GL1	bar0	10	14		14,11,8,10	3	4	3	1	0	1,1,1	100	1	1	1	0	3	1	5					0
6	5	4	Fri	GL1	bar0	10	22		22,21,20,19,12,15,13,10	3	8	7	2.33333	4	0,0,1,1,1,1,1	71.4286	0	1	1	0	3	1	5					0.367977
6	5	5	Fri	GL1	bar0	10	3		3,4,5,8,11,14,16,13,10	2	9	8	4	6	0,1,1,0,0,1,1,1	62.5	0	0	1	0	3	1	5					0.60206
6	5	6	Fri	GL1	bar0	10	23		23,22,15,13,10	4	5	4	1	0	1,1,1,1	100	1	1	1	0	3	1	5					0
6	5	7	Fri	GL1	bar0	10	9		9,6,1,2,3,7,10	2	7	6	3	4	0,0,1,1,1,1	66.6667	0	1	1	0	3	1	5					0.477121
6	5	8	Fri	GL1	bar0	10	5		5,8,11,14,16,13,10	2	7	6	3	4	1,0,0,1,1,1	66.6667	0	0	1	0	3	1	5					0.477121
6	5	9	Fri	GL1	bar0	10	15	animal fell out of the TP roll. Caught on the floor.	15,12,9,7,10,8	2	5	4	2	2	0,1,1,1	75	0	1	0	0	3	1	5					0.30103
6	5	10	Fri	GL1	bar0	10	20		20,21,22,23,24,16,14,11,8,5,4,3,2,1,6,17,18,19,20,21,22,23,24,16,14,16,13,10	5	28	27	5.4	22	1,1,0,1,1,0,1,1,0,0,1,0,0,1,0,0,1,0,1,1,0,1,1,0,1,1,1	59.2593	0	0	1	0	3	1	5					0.732394
6	5	11	Fri	GL1	bar0	10	16		16,24,23,22,21,20,19,18,17,6,1,2,3,7,10	2	15	14	7	12	0,0,1,0,0,1,0,1,1,0,1,1,1,1	57.1429	0	0	1	0	3	1	5					0.845098
6	5	12	Fri	GL1	bar0	10	2		2,3,7,10,8	3	4	3	1	0	1,1,1	100	1	1	0	0	3	1	5					0
6	5	13	Fri	GL1	bar0	10	17		17,6,9,12,15,22,23,24,16,14,11,8,10,7	4	13	12	3	8	1,1,0,1,0,0,1,1,0,1,1,1	66.6667	0	0	0	0	3	1	5					0.477121
6	5	14	Fri	GL1	bar0	10	14		14,16,24,23,22,15,12,19,20,21,22,15,13,10	3	14	13	4.33333	10	1,0,0,1,1,0,0,0,1,1,1,1,1	61.5385	0	0	1	0	3	1	5					0.636822
6	5	15	Fri	GL1	bar0	10	9		9,12,15,22,23,24,23,24,16,14,11,8,5,4,3,7,10	2	17	16	8	14	0,1,0,0,1,0,1,1,0,1,1,0,0,1,1,1	56.25	0	0	1	0	3	1	5					0.90309
6	5	16	Fri	GL1	bar0	10	24		24,23,22,21,20,19,18,17,6,1,2,3,4,5,8,11,14,16,24,23,22,15,13,10,7	3	24	23	7.66667	20	0,1,0,0,1,0,1,1,0,1,1,0,1,1,0,0,1,0,0,1,1,1,1	56.5217	0	0	0	0	3	1	5					0.884607
6	5	17	Fri	GL1	bar0	10	12		12,19,20,21,22,23,24,16,14,11,8,5,4,3,7,10,8	3	16	15	5	12	0,0,1,1,0,1,1,0,1,1,0,0,1,1,1	60	0	0	0	0	3	1	5					0.69897
6	5	18	Fri	GL1	bar0	10	3		3,4,5,8,11,14,16,13,10,7	2	9	8	4	6	0,1,1,0,0,1,1,1	62.5	0	0	0	0	3	1	5					0.60206
6	5	19	Fri	GL1	bar0	10	17		17,18,19,12,9,6,1,2,3,7,10,13	4	11	10	2.5	6	0,1,1,1,0,0,1,1,1,1	70	0	0	0	0	3	1	5					0.39794
6	5	20	Fri	GL1	bar0	10	23		23,24,16,14,11,8,5,4,5,8,11,14,16,13,10,7	4	15	14	3.5	10	1,1,0,1,1,0,0,1,1,0,0,1,1,1	64.2857	0	0	0	0	3	1	5					0.544068
6	5	21	Fri	GL1	bar0	10	5		5,4,3,7,10	2	5	4	2	2	0,1,1,1	75	0	1	1	0	3	1	5					0.30103
6	5	22	Fri	GL1	bar0	10	3		3,4,5,8,10	2	5	4	2	2	0,1,1,1	75	0	1	1	0	3	1	5					0.30103
6	5	23	Fri	GL1	bar0	10	20		20,21,22,23,24,16,13,10,8	5	8	7	1.4	2	1,1,0,1,1,1,1	85.7143	0	0	0	0	3	1	5					0.146128
7	5	1	Fri	GL1	bar0	19	13		13,10,8,11,14,16,13,15,12,19	3	10	9	3	6	0,0,0,1,1,1,1,1,1	66.6667	0	0	1	0	3	1	5					0.477121
7	5	2	Fri	GL1	bar0	19	4		4,5,8,10,7,9,12,19	5	8	7	1.4	2	0,1,1,1,1,1,1	85.7143	0	1	1	0	3	1	5					0.146128
7	5	3	Fri	GL1	bar0	19	14		14,16,13,10,7,9,12,19	5	8	7	1.4	2	1,1,0,1,1,1,1	85.7143	0	0	1	0	3	1	5					0.146128
7	5	4	Fri	GL1	bar0	19	1		1,2,3,4,5,8,10,13,15,12,19	4	11	10	2.5	6	0,1,0,0,1,1,1,1,1,1	70	0	0	1	0	3	1	5					0.39794
7	5	5	Fri	GL1	bar0	19	16		16,24,23,22,21,20,19	4	7	6	1.5	2	0,1,1,1,1,1	83.3333	0	1	1	0	3	1	5					0.176091
7	5	6	Fri	GL1	bar0	19	4		4,5,8,10,13,15,12,19	5	8	7	1.4	2	0,1,1,1,1,1,1	85.7143	0	1	1	0	3	1	5					0.146128
7	5	7	Fri	GL1	bar0	19	6		6,1,2,3,7,9,6,17,18,19	3	10	9	3	6	0,0,1,1,1,0,1,1,1	66.6667	0	0	1	0	3	1	5					0.477121
7	5	8	Fri	GL1	bar0	19	15		15,13,16,24,23,22,21,20,19	2	9	8	4	6	0,0,0,1,1,1,1,1	62.5	0	0	1	0	3	1	5					0.60206
7	5	9	Fri	GL1	bar0	19	7		7,3,2,1,6,17,18,19,12	3	8	7	2.33333	4	0,0,1,1,1,1,1	71.4286	0	1	0	0	3	1	5					0.367977
7	5	10	Fri	GL1	bar0	19	21		21,22,15,13,10,8,11,14,16,13,10,7,3,4,3,4,5,8,11,14,16,13,15,12,19	2	25	24	12	22	0,1,0,0,0,0,1,1,1,0,1,0,0,1,0,0,1,0,1,1,1,1,1,1	54.1667	0	0	1	0	3	1	5					1.07918
7	5	11	Fri	GL1	bar0	19	11		11,14,16,24,23,22,15,12,19	6	9	8	1.33333	2	1,1,0,1,1,1,1,1	87.5	0	0	1	0	3	1	5					0.124939
7	5	12	Fri	GL1	bar0	19	17	IB: circled the food	17,18,19,20	2	3	2	1	0	1,1	100	1	1	0	0	3	1	5					0
7	5	13	Fri	GL1	bar0	19	4		4,3,7,10,13,15,12,19	5	8	7	1.4	2	1,1,0,1,1,1,1	85.7143	0	0	1	0	3	1	5					0.146128
7	5	14	Fri	GL1	bar0	19	23		23,24,16,13,10,8,11,14,16,24,23,24,16,14,11,8,5,4,3,2,1,6,1,2,3,4,5,8,10,7,9,12,19,18	4	33	32	8	28	0,1,1,0,0,0,1,1,0,1,0,1,0,0,1,0,1,1,0,1,1,0,0,1,0,0,1,1,1,1,1,1	56.25	0	0	0	0	3	1	5					0.90309
7	5	15	Fri	GL1	bar0	19	13		13,15,22,21,20,19	3	6	5	1.66667	2	1,0,1,1,1	80	0	1	1	0	3	1	5					0.221849
7	5	16	Fri	GL1	bar0	19	14		14,16,24,23,22,21,20,19,18	5	8	7	1.4	2	1,0,1,1,1,1,1	85.7143	0	1	0	0	3	1	5					0.146128
7	5	17	Fri	GL1	bar0	19	1		1,6,17,18,19	4	5	4	1	0	1,1,1,1	100	1	1	1	0	3	1	5					0
7	5	18	Fri	GL1	bar0	19	15		15,13,10,8,11,14,11,8,5,4,3,2,1,6,17,18,19	2	17	16	8	14	0,0,0,0,1,0,1,0,1,1,0,1,1,1,1,1	56.25	0	0	1	0	3	1	5					0.90309
7	5	19	Fri	GL1	bar0	19	3		3,2,1,2,3,4,5,8,11,14,16,24,23,22,15,12,19,20	4	17	16	4	12	0,1,0,1,0,0,1,0,1,1,0,1,1,1,1,1	62.5	0	0	0	1	3	1	5					0.60206
7	5	20	Fri	GL1	bar0	19	22		22,23,22,21,20,19	3	6	5	1.66667	2	0,1,1,1,1	80	0	1	1	1	3	1	5					0.221849
7	5	21	Fri	GL1	bar0	19	16		16,24,23,22,15,12,9,6,1,2,3,4,5,4,3,7,9,12,19	4	19	18	4.5	14	0,1,1,1,1,0,0,0,0,1,0,0,1,1,1,1,1,1	61.1111	0	0	1	0	3	1	5					0.653213
7	5	22	Fri	GL1	bar0	19	4		4,3,7,10,13,15,22,23,22,15,12,19	5	12	11	2.2	6	1,1,0,1,1,0,0,1,1,1,1	72.7273	0	0	1	0	3	1	5					0.342423
7	5	23	Fri	GL1	bar0	19	17		17,6,1,2,3,7,10,8,10,7,3,4,5,8,10,7,9,6,17,18,19	2	21	20	10	18	0,0,0,1,1,0,0,1,1,0,0,0,1,1,1,1,0,1,1,1	55	0	0	1	0	3	1	5					1
7	5	24	Fri	GL1	bar0	19	10		10,7,9,6,17,18,19,20	4	7	6	1.5	2	1,1,0,1,1,1	83.3333	0	0	0	0	3	1	5					0.176091
7	5	25	Fri	GL1	bar0	19	22		22,23,24,16,13,15,12,19,18	3	8	7	2.33333	4	0,0,1,1,1,1,1	71.4286	0	1	0	0	3	1	5					0.367977
7	5	26	Fri	GL1	bar0	19	4		4,5,8,5,4,3,2,1,6,17,18,19	5	12	11	2.2	6	0,1,0,1,1,0,1,1,1,1,1	72.7273	0	0	1	1	3	1	5					0.342423
8	5	1	Fri	GL1	bar0	23	11	circled	11,8,5,4,3,2,1,6,17,18,19,20,21,22,23	4	15	14	3.5	10	0,0,0,1,0,1,1,0,1,1,1,1,1,1	64.2857	0	0	1	0	3	1	5					0.544068
8	5	2	Fri	GL1	bar0	23	1		1,6,17,18,19,20,21,22,23	6	9	8	1.33333	2	1,0,1,1,1,1,1,1	87.5	0	1	1	0	3	1	5					0.124939
8	5	3	Fri	GL1	bar0	23	7		7,3,4,5,8,11,14,16,24,23	5	10	9	1.8	4	0,0,1,1,1,1,1,1,1	77.7778	0	1	1	0	3	1	5					0.255273
8	5	4	Fri	GL1	bar0	23	12		12,19,20,21,22,23	3	6	5	1.66667	2	0,1,1,1,1	80	0	1	1	0	3	1	5					0.221849
8	5	5	Fri	GL1	bar0	23	16		16,13,15,22,23	2	5	4	2	2	0,1,1,1	75	0	1	1	0	3	1	5					0.30103
8	5	6	Fri	GL1	bar0	23	3		3,2,1,6,17,18,19,20,21,22,23	6	11	10	1.66667	4	0,1,1,0,1,1,1,1,1,1	80	0	0	1	0	3	1	5					0.221849
8	5	7	Fri	GL1	bar0	23	21		21,22,23	2	3	2	1	0	1,1	100	1	1	1	0	3	1	5					0
8	5	8	Fri	GL1	bar0	23	19		19,20,21,22,23	4	5	4	1	0	1,1,1,1	100	1	1	1	0	3	1	5					0
8	5	9	Fri	GL1	bar0	23	13		13,15,22,23	3	4	3	1	0	1,1,1	100	1	1	1	0	3	1	5					0
8	5	10	Fri	GL1	bar0	23	1		1,2,3,4,5,8,11,14,16,24,23	6	11	10	1.66667	4	0,1,0,1,1,1,1,1,1,1	80	0	0	1	0	3	1	5					0.221849
8	5	11	Fri	GL1	bar0	23	15		15,12,19,20,21,22,23	2	7	6	3	4	0,0,1,1,1,1	66.6667	0	1	1	0	3	1	5					0.477121
8	5	12	Fri	GL1	bar0	23	18		18,19,12,15,13,16,24,23	5	8	7	1.4	2	1,1,1,0,1,1,1	85.7143	0	0	1	0	3	1	5					0.146128
8	5	13	Fri	GL1	bar0	23	11		11,8,10,13,15,22,23	4	7	6	1.5	2	0,1,1,1,1,1	83.3333	0	1	1	0	3	1	5					0.176091
8	5	14	Fri	GL1	bar0	23	9		9,6,17,18,19,20,21,22,23	4	9	8	2	4	0,0,1,1,1,1,1,1	75	0	1	1	0	3	1	5					0.30103
8	5	15	Fri	GL1	bar0	23	5		5,4,3,2,1,6,17,18,19,20,21,22,23	6	13	12	2	6	0,1,0,1,1,0,1,1,1,1,1,1	75	0	0	1	0	3	1	5					0.30103
8	5	16	Fri	GL1	bar0	23	16		16,14,11,8,10,7,9,12,19,20,21,22,23	2	13	12	6	10	0,0,0,1,0,1,1,0,1,1,1,1	58.3333	0	0	1	0	3	1	5					0.778151
8	5	17	Fri	GL1	bar0	23	9		9,7,3,4,5,8,11,14,16,24,23	4	11	10	2.5	6	0,0,0,1,1,1,1,1,1,1	70	0	0	1	0	3	1	5					0.39794
8	5	18	Fri	GL1	bar0	23	4		4,3,2,1,6,9,12,15,22,23	7	10	9	1.28571	2	1,0,1,1,1,1,1,1,1	88.8889	0	1	1	0	3	1	5					0.109144
8	5	19	Fri	GL1	bar0	23	12		12,19,20,21,22,23	3	6	5	1.66667	2	0,1,1,1,1	80	0	1	1	0	3	1	5					0.221849
8	5	20	Fri	GL1	bar0	23	11		11,14,16,13,15,22,23	4	7	6	1.5	2	1,1,0,1,1,1	83.3333	0	0	1	0	3	1	5					0.176091
8	5	21	Fri	GL1	bar0	23	17	circle	17,6,1,2,3,4,5,8,11,14,16,24,23,22	6	13	12	2	6	1,0,0,1,0,1,1,1,1,1,1,1	75	0	0	0	0	3	1	5					0.30103
8	5	22	Fri	GL1	bar0	23	14		14,11,8,10,7,9,6,17,18,19,20,21,22,23	3	14	13	4.33333	10	0,0,1,0,1,0,0,1,1,1,1,1,1	61.5385	0	0	1	0	3	1	5					0.636822
8	5	23	Fri	GL1	bar0	23	1		1,2,3,4,5,8,11,14,16,24,23,22	6	11	10	1.66667	4	0,1,0,1,1,1,1,1,1,1	80	0	0	0	0	3	1	5					0.221849
8	5	24	Fri	GL1	bar0	23	13		13,16,24,23,22	3	4	3	1	0	1,1,1	100	1	1	0	0	3	1	5					0
8	5	25	Fri	GL1	bar0	23	20		20,19,18,17,6,9,7,10,8,11,14,16,24,23	3	14	13	4.33333	10	0,0,0,1,1,0,1,0,1,1,1,1,1	61.5385	0	0	1	0	3	1	5					0.636822
8	5	26	Fri	GL1	bar0	23	9		9,6,1,2,3,4,5,8,11,14,16,24,23,22	4	13	12	3	8	0,0,0,1,0,1,1,1,1,1,1,1	66.6667	0	0	0	0	3	1	5					0.477121
8	5	27	Fri	GL1	bar0	23	8		8,11,14,16,24,23	5	6	5	1	0	1,1,1,1,1	100	1	1	1	0	3	1	5					0
8	5	28	Fri	GL1	bar0	23	6		6,17,18,19,20,21,22,23	5	8	7	1.4	2	0,1,1,1,1,1,1	85.7143	0	1	1	0	3	1	5					0.146128
8	5	29	Fri	GL1	bar0	23	15		15,12,19,20,21,22,23	2	7	6	3	4	0,0,1,1,1,1	66.6667	0	1	1	0	3	1	5					0.477121
8	5	30	Fri	GL1	bar0	23	3		3,2,1,6,9,12,15,22,23	6	9	8	1.33333	2	0,1,1,1,1,1,1,1	87.5	0	1	1	0	3	1	5					0.124939
8	5	31	Fri	GL1	bar0	23	20		20,19,18,17,6,9,7,10,13,16,24,23	3	12	11	3.66667	8	0,0,0,1,1,0,1,1,1,1,1	63.6364	0	0	1	0	3	1	5					0.564271
8	5	32	Fri	GL1	bar0	23	10		10,7,9,12,19,20,21,22,23	4	9	8	2	4	0,1,1,0,1,1,1,1	75	0	0	1	0	3	1	5					0.30103
8	5	33	Fri	GL1	bar0	23	1		1,6,17,18,19,20,21,22,23	6	9	8	1.33333	2	1,0,1,1,1,1,1,1	87.5	0	1	1	0	3	1	5					0.124939
8	5	34	Fri	GL1	bar0	23	12		12,19,20,21,22,23	3	6	5	1.66667	2	0,1,1,1,1	80	0	1	1	0	3	1	5					0.221849
8	5	35	Fri	GL1	bar0	23	11		11,8,10,7,9,12,19,20,21,22,23	4	11	10	2.5	6	0,1,0,1,1,0,1,1,1,1	70	0	0	1	0	3	1	5					0.39794
8	5	36	Fri	GL1	bar0	23	2		2,1,6,17,18,19,20,21,22,23	7	10	9	1.28571	2	1,1,0,1,1,1,1,1,1	88.8889	0	0	1	0	3	1	5					0.109144
8	5	37	Fri	GL1	bar0	23	10		10,7,9,12,19,20,21,22,23	4	9	8	2	4	0,1,1,0,1,1,1,1	75	0	0	1	0	3	1	5					0.30103
5	6	1	Mon	GL1	bar0	2	5		5,8,10,13,15,12,19,18,17,6,1,2	3	12	11	3.66667	8	0,1,0,0,1,0,1,1,1,1,1	63.6364	0	0	1	0	3	1	6					0.564271
5	6	2	Mon	GL1	bar0	2	17		17,18,19,20,21,22,23,24,16,14,11,8,5,4,3,2	3	16	15	5	12	0,0,0,0,1,0,1,1,0,1,1,1,1,1,1	60	0	0	1	0	3	1	6					0.69897
5	6	3	Mon	GL1	bar0	2	23		23,22,15,12,9,6,1,2	7	8	7	1	0	1,1,1,1,1,1,1	100	1	1	1	0	3	1	6					0
5	6	4	Mon	GL1	bar0	2	10		10,8,5,4,3,2,1	3	6	5	1.66667	2	0,1,1,1,1	80	0	1	0	0	3	1	6					0.221849
5	6	5	Mon	GL1	bar0	2	18		18,17,6,9,7,3,4,5,8,11,14,16,13,15,22,23,22,21,20,19,18,17,6,1,2	4	25	24	6	20	1,1,0,1,1,0,0,0,0,0,1,1,0,0,0,1,0,1,1,1,1,1,1,1	58.3333	0	0	1	0	3	1	6					0.778151
5	6	6	Mon	GL1	bar0	2	15		15,22,23,22,21,20,19,12,9,6,1,2	5	12	11	2.2	6	0,0,1,0,1,1,1,1,1,1,1	72.7273	0	0	1	1	3	1	6					0.342423
5	6	7	Mon	GL1	bar0	2	7		7,9,12,19,20,21,22,23,24,16,14,11,8,5,4,3,2	2	17	16	8	14	0,0,0,0,0,1,0,1,1,0,1,1,1,1,1,1	56.25	0	0	1	0	3	1	6					0.90309
5	6	8	Mon	GL1	bar0	2	24		24,23,22,21,20,19,12,9,6,1,2,3	6	11	10	1.66667	4	0,1,0,1,1,1,1,1,1,1	80	0	0	0	0	3	1	6					0.221849
5	6	9	Mon	GL1	bar0	2	8		8,5,4,3,2,1	4	5	4	1	0	1,1,1,1	100	1	1	0	0	3	1	6					0
5	6	10	Mon	GL1	bar0	2	6		6,17,18,19,20,21,22,15,13,16,24,23,22,21,20,19,18,17,6,1,2	2	21	20	10	18	0,0,0,0,0,1,1,1,0,0,0,1,0,1,1,1,1,1,1,1	55	0	0	1	0	3	1	6					1
5	6	11	Mon	GL1	bar0	2	16		16,14,11,8,5,4,3,2	5	8	7	1.4	2	0,1,1,1,1,1,1	85.7143	0	1	1	0	3	1	6					0.146128
5	6	12	Mon	GL1	bar0	2	9		9,12,19,20,21,22,23,24,16,14,11,8,5,4,3,2	3	16	15	5	12	0,0,0,0,1,0,1,1,0,1,1,1,1,1,1	60	0	0	1	0	3	1	6					0.69897
5	6	13	Mon	GL1	bar0	2	4		4,5,8,11,14,16,24,16,14,11,8,10,13,16,24,23,22,15,12,19,12,15,22,23,22,21,20,19,18,17,6,1,2,3	2	33	32	16	30	0,0,0,0,1,0,1,0,1,1,1,0,0,0,0,1,1,1,0,1,0,0,0,1,0,1,1,1,1,1,1,1	53.125	0	0	0	0	3	1	6					1.20412
5	6	14	Mon	GL1	bar0	2	24		24,23,22,21,20,19,12,9,7,3,2	6	11	10	1.66667	4	0,1,0,1,1,1,1,1,1,1	80	0	0	1	0	3	1	6					0.221849
5	6	15	Mon	GL1	bar0	2	12		12,19,20,21,22,15,13,10,8,5,4,3,2,1	4	13	12	3	8	0,0,0,1,1,1,1,0,1,1,1,1	66.6667	0	0	0	0	3	1	6					0.477121
5	6	16	Mon	GL1	bar0	2	5		5,8,11,14,16,13,15,22,21,20,21,22,23,24,16,14,11,8,5,4,3,2	3	22	21	7	18	0,0,0,1,1,0,0,0,1,0,1,0,1,1,0,1,1,1,1,1,1	57.1429	0	0	1	0	3	1	6					0.845098
5	6	17	Mon	GL1	bar0	2	6		6,17,6,1,2	2	5	4	2	2	0,1,1,1	75	0	1	1	1	3	1	6					0.30103
5	6	18	Mon	GL1	bar0	2	21		21,20,19,12,15,13,10,8,11,14,16,24,16,14,11,8,5,4,3,2,1	7	20	19	2.71429	12	1,1,1,0,1,1,0,0,0,1,0,1,0,1,1,1,1,1,1	68.4211	0	0	0	0	3	1	6					0.433656
5	6	19	Mon	GL1	bar0	2	18		18,17,6,1,2	4	5	4	1	0	1,1,1,1	100	1	1	1	0	3	1	6					0
5	6	20	Mon	GL1	bar0	2	5		5,8,10,13,10,7,3,2,1	3	8	7	2.33333	4	0,1,0,1,1,1,1	71.4286	0	0	0	0	3	1	6					0.367977
6	6	1	Mon	GL1	bar0	10	17		17,6,9,12,19,18,17,6,9,7,10,13	4	11	10	2.5	6	1,1,0,0,0,1,1,1,1,1	70	0	0	0	0	3	1	6					0.39794
6	6	2	Mon	GL1	bar0	10	24		24,23,22,15,12,9,6,1,2,3,4,5,8,10,7	3	14	13	4.33333	10	0,1,1,0,1,0,0,1,1,0,1,1,1	61.5385	0	0	0	0	3	1	6					0.636822
6	6	3	Mon	GL1	bar0	10	20		20,19,18,17,6,9,7,10,13	5	8	7	1.4	2	1,0,1,1,1,1,1	85.7143	0	1	0	0	3	1	6					0.146128
6	6	4	Mon	GL1	bar0	10	9		9,6,17,18,19,20,21,22,23,24,16,14,11,8,10	2	15	14	7	12	0,0,0,1,0,1,1,0,1,1,0,1,1,1	57.1429	0	0	1	0	3	1	6					0.845098
6	6	5	Mon	GL1	bar0	10	2		2,3,7,10,8	3	4	3	1	0	1,1,1	100	1	1	0	0	3	1	6					0
6	6	6	Mon	GL1	bar0	10	23		23,22,15,12,9,6,1,2,3,4,5,8,10	4	13	12	3	8	1,1,0,1,0,0,1,1,0,1,1,1	66.6667	0	0	1	0	3	1	6					0.477121
6	6	7	Mon	GL1	bar0	10	11		11,14,16,13,10,7	2	5	4	2	2	0,1,1,1	75	0	1	0	0	3	1	6					0.30103
6	6	8	Mon	GL1	bar0	10	15		15,12,9,7,3,4,5,8,11,14,16,24,23,22,21,20,19,18,17,6,1,2,3,4,5,8,11,14,16,24,16,13,10	2	33	32	16	30	0,1,1,0,0,1,1,0,0,1,0,0,1,0,0,1,0,1,1,0,1,1,0,1,1,0,0,1,0,1,1,1	53.125	0	0	1	0	3	1	6					1.20412
6	6	9	Mon	GL1	bar0	10	4		4,5,8,11,14,16,24,23,22,15,12,9,6,17,6,1,2,3,7,10	3	20	19	6.33333	16	1,1,0,0,1,0,0,1,1,0,1,0,0,1,0,1,1,1,1	57.8947	0	0	1	0	3	1	6					0.801632
6	6	10	Mon	GL1	bar0	10	17		17,6,9,7,10,8	4	5	4	1	0	1,1,1,1	100	1	1	0	0	3	1	6					0
6	6	11	Mon	GL1	bar0	10	21		21,20,19,12,9,7,3,4,5,8,11,14,16,24,16,13,10,8	4	17	16	4	12	0,1,1,1,1,0,0,1,1,0,0,1,0,1,1,1	62.5	0	0	0	0	3	1	6					0.60206
6	6	12	Mon	GL1	bar0	10	12		12,19,20,21,22,23,24,16,14,11,8,10,13	3	12	11	3.66667	8	0,0,1,1,0,1,1,0,1,1,1	63.6364	0	0	0	0	3	1	6					0.564271
6	6	13	Mon	GL1	bar0	10	2		2,3,7,9,12,19,20,21,22,23,22,21,20,21,22,15,13,16,14,16,13,10	3	22	21	7	18	1,1,0,0,0,0,1,1,0,1,0,0,1,1,1,1,0,0,1,1,1	57.1429	0	0	1	0	3	1	6					0.845098
6	6	14	Mon	GL1	bar0	10	24		24,23,22,15,12,19,18,17,6,1,2,3,4,3,2,1,2,3,7,10	3	20	19	6.33333	16	0,1,1,0,0,0,1,1,0,1,1,0,1,0,0,1,1,1,1	57.8947	0	0	1	0	3	1	6					0.801632
6	6	15	Mon	GL1	bar0	10	4		4,5,8,10	3	4	3	1	0	1,1,1	100	1	1	1	0	3	1	6					0
6	6	16	Mon	GL1	bar0	10	15		15,12,19,18,17,6,1,2,3,7,10	2	11	10	5	8	0,0,0,1,1,0,1,1,1,1	60	0	0	1	0	3	1	6					0.69897
6	6	17	Mon	GL1	bar0	10	18		18,17,6,1,2,3,4,5,8,11,14,16,13,10	5	14	13	2.6	8	1,1,0,1,1,0,1,1,0,0,1,1,1	69.2308	0	0	1	0	3	1	6					0.414973
6	6	18	Mon	GL1	bar0	10	11		11,14,16,24,23,22,15,12,19,18,17,6,9,7,10	2	15	14	7	12	0,1,0,0,1,1,0,0,0,1,1,1,1,1	57.1429	0	0	1	0	3	1	6					0.845098
6	6	19	Mon	GL1	bar0	10	6		6,1,2,3,7,10	3	6	5	1.66667	2	0,1,1,1,1	80	0	1	1	0	3	1	6					0.221849
6	6	20	Mon	GL1	bar0	10	24		24,23,22,15,13,10,8	3	6	5	1.66667	2	0,1,1,1,1	80	0	1	0	0	3	1	6					0.221849
6	6	21	Mon	GL1	bar0	10	12		12,19,20,21,22,23,24,16,14,11,8,5,4,3,7,10,8	3	16	15	5	12	0,0,1,1,0,1,1,0,1,1,0,0,1,1,1	60	0	0	0	0	3	1	6					0.69897
6	6	22	Mon	GL1	bar0	10	2		2,3,7,10	3	4	3	1	0	1,1,1	100	1	1	1	0	3	1	6					0
6	6	23	Mon	GL1	bar0	10	15		15,22,23,24,16,14,11,8,5,4,3,7,10	2	13	12	6	10	0,0,1,1,0,1,1,0,0,1,1,1	58.3333	0	0	1	0	3	1	6					0.778151
7	6	1	Mon	GL1	bar0	19	21		21,20,19	2	3	2	1	0	1,1	100	1	1	1	0	3	1	6					0
7	6	2	Mon	GL1	bar0	19	3		3,4,5,8,10,13,15,22,21,20,19	4	11	10	2.5	6	0,0,1,1,1,1,0,1,1,1	70	0	0	1	0	3	1	6					0.39794
7	6	3	Mon	GL1	bar0	19	22		22,21,20,19	3	4	3	1	0	1,1,1	100	1	1	1	0	3	1	6					0
7	6	4	Mon	GL1	bar0	19	7		7,9,12,19	3	4	3	1	0	1,1,1	100	1	1	1	0	3	1	6					0
7	6	5	Mon	GL1	bar0	19	14		14,11,8,5,4,3,7,9,6,1,2,3,4,5,8,10,13,15,12,19,18	5	20	19	3.8	14	0,1,0,1,1,1,1,0,0,0,1,0,0,1,1,1,1,1,1	63.1579	0	0	0	0	3	1	6					0.579784
7	6	6	Mon	GL1	bar0	19	9		9,7,10,13,15,12,19	2	7	6	3	4	0,0,1,1,1,1	66.6667	0	1	1	0	3	1	6					0.477121
7	6	7	Mon	GL1	bar0	19	16		16,14,11,8,5,4,3,2,1,6,17,18,19	4	13	12	3	8	0,0,1,0,1,1,0,1,1,1,1,1	66.6667	0	0	1	0	3	1	6					0.477121
7	6	8	Mon	GL1	bar0	19	7		7,10,13,15,22,23,24,16,14,11,8,10,7,3,4,5,8,11,14,16,13,15,12,19	3	24	23	7.66667	20	0,1,1,0,0,0,1,0,0,1,1,1,0,0,0,1,0,1,1,1,1,1,1	56.5217	0	0	1	0	3	1	6					0.884607
7	6	9	Mon	GL1	bar0	19	23		23,22,15,13,10,8,11,14,16,14,11,8,5,4,3,2,1,2,3,4,3,2,1,6,17,18,19	4	27	26	6.5	22	1,1,0,0,0,0,1,1,0,0,1,0,1,1,0,1,0,1,0,1,0,1,1,1,1,1	57.6923	0	0	1	0	3	1	6					0.812913
7	6	10	Mon	GL1	bar0	19	4		4,5,8,10,7,9,6,17,18,19	5	10	9	1.8	4	0,1,1,1,1,0,1,1,1	77.7778	0	0	1	0	3	1	6					0.255273
7	6	11	Mon	GL1	bar0	19	17		17,18,19	2	3	2	1	0	1,1	100	1	1	1	0	3	1	6					0
7	6	12	Mon	GL1	bar0	19	2		2,1,2,3,4,5,8,11,14,16,24,23,22,21,20,19,12	5	16	15	3	10	1,0,1,0,0,1,0,1,1,0,1,1,1,1,1	66.6667	0	0	0	1	3	1	6					0.477121
7	6	13	Mon	GL1	bar0	19	14		14,11,8,5,4,3,2,1,6,9,12,19,18	5	12	11	2.2	6	0,1,0,1,1,0,1,1,1,1,1	72.7273	0	0	0	0	3	1	6					0.342423
7	6	14	Mon	GL1	bar0	19	9		9,7,3,4,5,8,10,13,15,22,23,24,16,24,16,13,15,12,19,20	2	19	18	9	16	0,0,0,0,1,1,1,1,0,0,0,1,0,1,1,1,1,1	55.5556	0	0	0	0	3	1	6					0.954243
7	6	15	Mon	GL1	bar0	19	5		5,4,3,2,3,4,5,8,11,14,16,24,16,13,10,7,3,4,5,8,10,7,9,6,17,18,19,20	6	27	26	4.33333	20	1,1,0,1,0,0,1,0,1,1,0,1,1,0,1,0,0,0,1,1,1,1,0,1,1,1	61.5385	0	0	0	0	3	1	6					0.636822
7	6	16	Mon	GL1	bar0	19	15		15,13,16,24,16,14,11,8,10,13,15,12,19,20	2	13	12	6	10	0,0,0,1,0,0,1,1,1,1,1,1	58.3333	0	0	0	0	3	1	6					0.778151
7	6	17	Mon	GL1	bar0	19	21		21,22,23,24,16,13,15,12,19,18	2	9	8	4	6	0,0,0,1,1,1,1,1	62.5	0	0	0	0	3	1	6					0.60206
7	6	18	Mon	GL1	bar0	19	1		1,2,3,7,10,13,15,22,21,20,19,18	4	11	10	2.5	6	0,1,1,0,1,1,0,1,1,1	70	0	0	0	0	3	1	6					0.39794
7	6	19	Mon	GL1	bar0	19	14		14,11,8,5,4,3,2,1,6,17,18,19	5	12	11	2.2	6	0,1,0,1,1,0,1,1,1,1,1	72.7273	0	0	1	0	3	1	6					0.342423
7	6	20	Mon	GL1	bar0	19	7		7,3,7,9,12,19	3	6	5	1.66667	2	0,1,1,1,1	80	0	1	1	1	3	1	6					0.221849
7	6	21	Mon	GL1	bar0	19	22		22,21,22,23,24,16,14,11,8,5,4,3,2,3,4,5,8,10,7,9,12,19	3	22	21	7	18	1,0,0,0,1,0,0,1,0,1,1,0,1,0,0,1,1,1,1,1,1	57.1429	0	0	1	1	3	1	6					0.845098
8	6	1	Mon	GL1	bar0	23	1		1,2,3,4,5,8,11,14,16,24,23	6	11	10	1.66667	4	0,1,0,1,1,1,1,1,1,1	80	0	0	1	0	3	1	6					0.221849
8	6	2	Mon	GL1	bar0	23	11		11,14,16,24,23	4	5	4	1	0	1,1,1,1	100	1	1	1	0	3	1	6					0
8	6	3	Mon	GL1	bar0	23	3		3,7,10,13,16,24,23	6	7	6	1	0	1,1,1,1,1,1	100	1	1	1	0	3	1	6					0
8	6	4	Mon	GL1	bar0	23	21		21,22,15,13,10,7,9,12,19,20,21,22,23	2	13	12	6	10	1,0,0,0,0,1,1,0,1,1,1,1	58.3333	0	0	1	0	3	1	6					0.778151
8	6	5	Mon	GL1	bar0	23	9		9,7,10,13,15,22,23,24	4	7	6	1.5	2	0,1,1,1,1,1	83.3333	0	1	0	0	3	1	6					0.176091
8	6	6	Mon	GL1	bar0	23	13		13,15,22,23	3	4	3	1	0	1,1,1	100	1	1	1	0	3	1	6					0
8	6	7	Mon	GL1	bar0	23	5		5,8,11,14,11,8,10,13,15,22,23,22	6	11	10	1.66667	4	1,1,1,0,0,1,1,1,1,1	80	0	0	0	0	3	1	6					0.221849
8	6	8	Mon	GL1	bar0	23	6		6,1,2,3,4,5,8,11,14,16,24,23,22	5	12	11	2.2	6	0,0,1,0,1,1,1,1,1,1,1	72.7273	0	0	0	0	3	1	6					0.342423
8	6	9	Mon	GL1	bar0	23	14		14,11,8,11,14,16,24,23	3	8	7	2.33333	4	0,0,1,1,1,1,1	71.4286	0	1	1	1	3	1	6					0.367977
8	6	10	Mon	GL1	bar0	23	12		12,19,12,9,6,17,18,19,20,21,22,23,24	3	12	11	3.66667	8	0,1,0,0,0,1,1,1,1,1,1	63.6364	0	0	0	1	3	1	6					0.564271
8	6	11	Mon	GL1	bar0	23	16		16,24,16,14,11,14,11,8,5,4,3,7,9,12,15,22,23	2	17	16	8	14	1,0,0,0,1,0,0,0,0,1,1,1,1,1,1,1	56.25	0	0	1	1	3	1	6					0.90309
8	6	12	Mon	GL1	bar0	23	20		20,21,22,23,22	3	4	3	1	0	1,1,1	100	1	1	0	0	3	1	6					0
8	6	13	Mon	GL1	bar0	23	7	mouse grooming for like 10 minutes at node 10.	7,3,4,5,8,10,13,15,22,23,22	5	10	9	1.8	4	0,0,1,1,1,1,1,1,1	77.7778	0	1	0	0	3	1	6					0.255273
5	7	1	Wed	GL1	bar0	2	13	PROBE	13,15,22,21,20,19,18,17,6,1,2,3	4	11	10	2.5	6	0,0,0,1,1,1,1,1,1,1	70	0	0	0	0	3	1	7			1		0.39794
5	7	2	Wed	GL1	bar0	2	5		5,4,3,2	3	4	3	1	0	1,1,1	100	1	1	1	0	3	1	7					0
5	7	3	Wed	GL1	bar0	2	24		24,23,22,15,13,16,14,11,8,5,4,3,2	6	13	12	2	6	0,1,1,1,0,0,1,1,1,1,1,1	75	0	0	1	0	3	1	7					0.30103
5	7	4	Wed	GL1	bar0	2	19		19,20,21,22,15,13,10,8,5,4,3,2	5	12	11	2.2	6	0,0,1,1,1,1,0,1,1,1,1	72.7273	0	0	1	0	3	1	7					0.342423
5	7	5	Wed	GL1	bar0	2	7	IB: mostly doing big rounds counter clockwise	7,9,12,19,20,21,22,23,24,16,14,11,8,5,4,3,2	2	17	16	8	14	0,0,0,0,0,1,0,1,1,0,1,1,1,1,1,1	56.25	0	0	1	0	3	1	7					0.90309
5	7	6	Wed	GL1	bar0	2	16		16,14,11,8,5,4,3,2	5	8	7	1.4	2	0,1,1,1,1,1,1	85.7143	0	1	1	0	3	1	7					0.146128
5	7	7	Wed	GL1	bar0	2	20		20,21,22,23,24,16,14,11,8,5,4,3,2	6	13	12	2	6	0,1,0,1,1,0,1,1,1,1,1,1	75	0	0	1	0	3	1	7					0.30103
5	7	8	Wed	GL1	bar0	2	13		13,16,14,11,8,5,4,3,2	4	9	8	2	4	0,0,1,1,1,1,1,1	75	0	1	1	0	3	1	7					0.30103
5	7	9	Wed	GL1	bar0	2	18	PROBE	18,19,12,9,7,3,2,1	4	7	6	1.5	2	0,1,1,1,1,1	83.3333	0	1	0	0	3	1	7			9		0.176091
5	7	10	Wed	GL1	bar0	2	24		24,23,22,21,20,19,18,17,6,1,2	6	11	10	1.66667	4	0,1,0,1,1,1,1,1,1,1	80	0	0	1	0	3	1	7					0.221849
5	7	11	Wed	GL1	bar0	2	5		5,8,11,14,11,8,5,4,3,2	3	10	9	3	6	0,0,0,1,1,1,1,1,1	66.6667	0	0	1	0	3	1	7					0.477121
5	7	12	Wed	GL1	bar0	2	17		17,18,17,6,1,2	3	6	5	1.66667	2	0,1,1,1,1	80	0	1	1	1	3	1	7					0.221849
5	7	13	Wed	GL1	bar0	2	23		23,22,15,12,9,6,1,2	7	8	7	1	0	1,1,1,1,1,1,1	100	1	1	1	0	3	1	7					0
5	7	14	Wed	GL1	bar0	2	5		5,4,3,2	3	4	3	1	0	1,1,1	100	1	1	1	0	3	1	7					0
5	7	15	Wed	GL1	bar0	2	21		21,20,19,18,17,6,1,2,3	7	8	7	1	0	1,1,1,1,1,1,1	100	1	1	0	0	3	1	7					0
5	7	16	Wed	GL1	bar0	2	10		10,13,16,24,23,22,21,20,19,18,17,6,1,2	3	14	13	4.33333	10	0,0,0,0,1,0,1,1,1,1,1,1,1	61.5385	0	0	1	0	3	1	7					0.636822
5	7	17	Wed	GL1	bar0	2	6		6,17,18,19,20,21,22,23,24,23,24,16,14,11,14,11,8,5,4,3,2	2	21	20	10	18	0,0,0,0,0,1,0,1,0,1,1,0,1,0,1,1,1,1,1,1	55	0	0	1	0	3	1	7					1
5	7	18	Wed	GL1	bar0	2	20		20,21,22,23,24,23,22,23,24,16,14,11,8,5,4,3,2	6	17	16	2.66667	10	0,1,0,1,0,1,0,1,1,0,1,1,1,1,1,1	68.75	0	0	1	0	3	1	7					0.425969
5	7	19	Wed	GL1	bar0	2	7	losing interest in food, a lot of climbing	7,9,6,1,6,17,18,17,6,1,2,3	2	11	10	5	8	0,1,1,0,0,0,1,1,1,1	60	0	0	0	0	3	1	7					0.69897
5	7	20	Wed	GL1	bar0	2	16		16,24,23,24,16,14,11,8,5,4,3,2,1	5	12	11	2.2	6	0,0,1,1,0,1,1,1,1,1,1	72.7273	0	0	0	1	3	1	7					0.342423
5	7	21	Wed	GL1	bar0	2	8		8,11,8,5,4,3,2,1	4	7	6	1.5	2	0,1,1,1,1,1	83.3333	0	1	0	1	3	1	7					0.176091
5	7	22	Wed	GL1	bar0	2	17		17,6,1,2,3	3	4	3	1	0	1,1,1	100	1	1	0	0	3	1	7					0
6	7	1	Wed	GL1	bar0	10	2	PROBE	2,3,7,9,12,19,20,21,22,23,24,16,14,11,8,5,4,3,7,10,8	3	20	19	6.33333	16	1,1,0,0,0,0,1,1,0,1,1,0,1,1,0,0,1,1,1	57.8947	0	0	0	0	3	1	7			1		0.801632
6	7	2	Wed	GL1	bar0	10	22		22,21,20,19,12,9,7,10	3	8	7	2.33333	4	0,0,1,1,1,1,1	71.4286	0	1	1	0	3	1	7					0.367977
6	7	3	Wed	GL1	bar0	10	1		1,2,3,7,10	4	5	4	1	0	1,1,1,1	100	1	1	1	0	3	1	7					0
6	7	4	Wed	GL1	bar0	10	21		21,22,23,24,16,13,10	4	7	6	1.5	2	1,0,1,1,1,1	83.3333	0	1	1	0	3	1	7					0.176091
6	7	5	Wed	GL1	bar0	10	5		5,8,10,7	2	3	2	1	0	1,1	100	1	1	0	0	3	1	7					0
6	7	6	Wed	GL1	bar0	10	12		12,19,20,21,22,23,24,16,14,11,8,10	3	12	11	3.66667	8	0,0,1,1,0,1,1,0,1,1,1	63.6364	0	0	1	0	3	1	7					0.564271
6	7	7	Wed	GL1	bar0	10	6		6,1,2,3,7,10	3	6	5	1.66667	2	0,1,1,1,1	80	0	1	1	0	3	1	7					0.221849
6	7	8	Wed	GL1	bar0	10	11		11,14,16,24,23,22,15,12,9,6,1,2,3,4,5,8,10,13	2	17	16	8	14	0,1,0,0,1,1,0,1,0,0,1,1,0,1,1,1	56.25	0	0	0	0	3	1	7					0.90309
6	7	9	Wed	GL1	bar0	10	17	PROBE	17,18,19,20,21,22,23,24,16,14,11,8,10,7	4	13	12	3	8	0,1,0,1,1,0,1,1,0,1,1,1	66.6667	0	0	0	0	3	1	7			9		0.477121
6	7	10	Wed	GL1	bar0	10	23		23,22,15,13,10	4	5	4	1	0	1,1,1,1	100	1	1	1	0	3	1	7					0
6	7	11	Wed	GL1	bar0	10	4		4,3,7,10	3	4	3	1	0	1,1,1	100	1	1	1	0	3	1	7					0
6	7	12	Wed	GL1	bar0	10	17		17,18,19,12,9,7,10	4	7	6	1.5	2	0,1,1,1,1,1	83.3333	0	1	1	0	3	1	7					0.176091
6	7	13	Wed	GL1	bar0	10	16		16,24,23,22,15,12,9,7,3,4,5,8,11,14,16,24,23,22,15,13,10,7	2	21	20	10	18	0,0,1,1,0,1,1,0,0,1,1,0,0,1,0,0,1,1,1,1	55	0	0	0	0	3	1	7					1
6	7	14	Wed	GL1	bar0	10	9	losing interest in food	9,12,15,13,10	2	5	4	2	2	0,1,1,1	75	0	1	1	0	3	1	7					0.30103
6	7	15	Wed	GL1	bar0	10	22		22,23,24,16,14,11,8,10,7	3	8	7	2.33333	4	0,1,1,0,1,1,1	71.4286	0	0	0	0	3	1	7					0.367977
6	7	16	Wed	GL1	bar0	10	3		3,2,1,6,17,6,1,2,3,4,5,8,11,14,11,8,5,4,3,2,1,6,17,18,19,20,21,22,15,13,10,8	2	31	30	15	28	0,0,1,0,1,0,1,1,0,1,1,0,0,1,1,0,0,1,0,0,1,0,0,1,0,1,1,1,1,1	53.3333	0	0	0	0	3	1	7					1.17609
6	7	17	Wed	GL1	bar0	10	19		19,20,21,22,23,24,16,14,11,8,5,4,3,2,1,6,9,7,10,8	4	19	18	4.5	14	0,1,1,0,1,1,0,1,1,0,0,1,0,0,1,1,1,1	61.1111	0	0	0	0	3	1	7					0.653213
6	7	18	Wed	GL1	bar0	10	11		11,8,10,13	2	3	2	1	0	1,1	100	1	1	0	0	3	1	7					0
6	7	19	Wed	GL1	bar0	10	9		9,6,17,18,19,12,15,13,15,12,9,6,17,18,19,20,21,22,15,13,10	2	21	20	10	18	0,0,0,1,1,1,1,0,0,1,0,0,0,1,0,1,1,1,1,1	55	0	0	1	0	3	1	7					1
6	7	20	Wed	GL1	bar0	10	23		23,22,21,20,19,12,15,13,10	4	9	8	2	4	1,0,0,1,1,1,1,1	75	0	0	1	0	3	1	7					0.30103
7	7	1	Wed	GL1	bar0	19	4	PROBE	4,3,7,9,12,15,22,21,20,19,18	5	10	9	1.8	4	1,1,1,1,0,0,1,1,1	77.7778	0	0	0	0	3	1	7			1		0.255273
7	7	2	Wed	GL1	bar0	19	15		15,12,19	2	3	2	1	0	1,1	100	1	1	1	0	3	1	7					0
7	7	3	Wed	GL1	bar0	19	17		17,18,19	2	3	2	1	0	1,1	100	1	1	1	0	3	1	7					0
7	7	4	Wed	GL1	bar0	19	10		10,13,15,12,19	4	5	4	1	0	1,1,1,1	100	1	1	1	0	3	1	7					0
7	7	5	Wed	GL1	bar0	19	4		4,3,2,1,6,9,12,19	5	8	7	1.4	2	1,0,1,1,1,1,1	85.7143	0	1	1	0	3	1	7					0.146128
7	7	6	Wed	GL1	bar0	19	9		9,6,17,18,19	2	5	4	2	2	0,1,1,1	75	0	1	1	0	3	1	7					0.30103
7	7	7	Wed	GL1	bar0	19	24		24,23,22,15,13,10,7,9,6,17,18,19	5	12	11	2.2	6	1,1,1,0,0,1,1,0,1,1,1	72.7273	0	0	1	0	3	1	7					0.342423
7	7	8	Wed	GL1	bar0	19	4		4,3,2,1,6,17,18,19	5	8	7	1.4	2	1,0,1,1,1,1,1	85.7143	0	1	1	0	3	1	7					0.146128
7	7	9	Wed	GL1	bar0	19	14	PROBE	14,16,13,10,7,9,12,19,18	5	8	7	1.4	2	1,1,0,1,1,1,1	85.7143	0	0	0	0	3	1	7			9		0.146128
7	7	10	Wed	GL1	bar0	19	17		17,18,19	2	3	2	1	0	1,1	100	1	1	1	0	3	1	7					0
7	7	11	Wed	GL1	bar0	19	10		10,13,15,12,19	4	5	4	1	0	1,1,1,1	100	1	1	1	0	3	1	7					0
7	7	12	Wed	GL1	bar0	19	4		4,3,2,1,6,17,18,19	5	8	7	1.4	2	1,0,1,1,1,1,1	85.7143	0	1	1	0	3	1	7					0.146128
7	7	13	Wed	GL1	bar0	19	21		21,22,23,24,16,14,11,8,5,4,5,8,10,13,15,22,21,20,19	2	19	18	9	16	0,0,0,1,0,0,1,0,1,0,1,1,1,1,0,1,1,1	55.5556	0	0	1	0	3	1	7					0.954243
7	7	14	Wed	GL1	bar0	19	10		10,8,5,4,3,7,9,12,19	4	9	8	2	4	0,0,1,1,1,1,1,1	75	0	1	1	0	3	1	7					0.30103
7	7	15	Wed	GL1	bar0	19	16		16,14,11,14,11,8,10,7,9,6,17,18,19	4	13	12	3	8	0,0,1,0,1,1,1,1,0,1,1,1	66.6667	0	0	1	1	3	1	7					0.477121
7	7	16	Wed	GL1	bar0	19	3		3,2,1,6,9,12,19	4	7	6	1.5	2	0,1,1,1,1,1	83.3333	0	1	1	0	3	1	7					0.176091
7	7	17	Wed	GL1	bar0	19	23		23,24,16,14,11,8,5,4,3,2,1,2,3,4,3,2,1,6,17,18,19,18	4	21	20	5	16	0,1,0,0,1,0,1,1,0,1,0,1,0,1,0,1,1,1,1,1	60	0	0	0	0	3	1	7					0.69897
7	7	18	Wed	GL1	bar0	19	9		9,6,17,18,17,6,9,12,19	2	9	8	4	6	0,1,1,0,0,1,1,1	62.5	0	0	1	0	3	1	7					0.60206
7	7	19	Wed	GL1	bar0	19	16		16,14,11,8,10,7,9,6,17,18,19	4	11	10	2.5	6	0,0,1,1,1,1,0,1,1,1	70	0	0	1	0	3	1	7					0.39794
7	7	20	Wed	GL1	bar0	19	1		1,6,17,18,19	4	5	4	1	0	1,1,1,1	100	1	1	1	0	3	1	7					0
7	7	21	Wed	GL1	bar0	19	4		4,5,8,10,7,9,12,19,18	5	8	7	1.4	2	0,1,1,1,1,1,1	85.7143	0	1	0	0	3	1	7					0.146128
7	7	22	Wed	GL1	bar0	19	17		17,18,19	2	3	2	1	0	1,1	100	1	1	1	0	3	1	7					0
7	7	23	Wed	GL1	bar0	19	10		10,8,11,14,16,13,15,12,19	4	9	8	2	4	0,0,1,1,1,1,1,1	75	0	1	1	0	3	1	7					0.30103
7	7	24	Wed	GL1	bar0	19	21		21,22,23,24,16,13,15,12,19	2	9	8	4	6	0,0,0,1,1,1,1,1	62.5	0	0	1	0	3	1	7					0.60206
7	7	25	Wed	GL1	bar0	19	9		9,6,17,18,19	2	5	4	2	2	0,1,1,1	75	0	1	1	0	3	1	7					0.30103
7	7	26	Wed	GL1	bar0	19	8		8,5,4,3,7,10,13,15,22,23,22,15,13,10,7,9,12,19	5	18	17	3.4	12	0,1,1,1,0,1,1,0,0,1,1,0,0,1,1,1,1	64.7059	0	0	1	0	3	1	7					0.531479
7	7	27	Wed	GL1	bar0	19	3		3,4,5,8,11,14,16,24,23,22,15,12,19,12	4	13	12	3	8	0,0,1,0,1,1,0,1,1,1,1,1	66.6667	0	0	0	0	3	1	7					0.477121
7	7	28	Wed	GL1	bar0	19	14		14,11,8,5,4,3,2,1,6,17,18,19	5	12	11	2.2	6	0,1,0,1,1,0,1,1,1,1,1	72.7273	0	0	1	0	3	1	7					0.342423
7	7	29	Wed	GL1	bar0	19	23		23,24,23,24,16,14,16,24,23,22,21,20,19	4	13	12	3	8	0,1,0,1,0,1,0,1,1,1,1,1	66.6667	0	0	1	1	3	1	7					0.477121
8	7	1	Wed	GL1	bar0	23	20	PROBE	20,21,22,23,24	3	4	3	1	0	1,1,1	100	1	1	0	0	3	1	7			1		0
8	7	2	Wed	GL1	bar0	23	1		1,2,3,7,9,12,19,20,21,22,23	6	11	10	1.66667	4	0,1,1,1,1,0,1,1,1,1	80	0	0	1	0	3	1	7					0.221849
8	7	3	Wed	GL1	bar0	23	13		13,10,7,9,12,19,20,21,22,23	3	10	9	3	6	0,0,1,1,0,1,1,1,1	66.6667	0	0	1	0	3	1	7					0.477121
8	7	4	Wed	GL1	bar0	23	6		6,9,7,10,13,16,24,23	5	8	7	1.4	2	1,0,1,1,1,1,1	85.7143	0	1	1	0	3	1	7					0.146128
8	7	5	Wed	GL1	bar0	23	14		14,11,8,5,4,3,7,9,12,15,22,23	3	12	11	3.66667	8	0,0,0,0,1,1,1,1,1,1,1	63.6364	0	0	1	0	3	1	7					0.564271
8	7	6	Wed	GL1	bar0	23	7		7,3,4,5,8,11,14,16,24,23	5	10	9	1.8	4	0,0,1,1,1,1,1,1,1	77.7778	0	1	1	0	3	1	7					0.255273
8	7	7	Wed	GL1	bar0	23	21		21,22,23	2	3	2	1	0	1,1	100	1	1	1	0	3	1	7					0
8	7	8	Wed	GL1	bar0	23	1		1,6,9,12,15,22,23	6	7	6	1	0	1,1,1,1,1,1	100	1	1	1	0	3	1	7					0
8	7	9	Wed	GL1	bar0	23	11	PROBE	11,14,16,24,23,22	4	5	4	1	0	1,1,1,1	100	1	1	0	0	3	1	7			9		0
8	7	10	Wed	GL1	bar0	23	20		20,21,22,23	3	4	3	1	0	1,1,1	100	1	1	1	0	3	1	7					0
8	7	11	Wed	GL1	bar0	23	9		9,12,15,22,23	4	5	4	1	0	1,1,1,1	100	1	1	1	0	3	1	7					0
8	7	12	Wed	GL1	bar0	23	14		14,11,8,5,4,3,7,9,12,15,22,23	3	12	11	3.66667	8	0,0,0,0,1,1,1,1,1,1,1	63.6364	0	0	1	0	3	1	7					0.564271
8	7	13	Wed	GL1	bar0	23	18		18,19,12,15,13,16,24,23	5	8	7	1.4	2	1,1,1,0,1,1,1	85.7143	0	0	1	0	3	1	7					0.146128
8	7	14	Wed	GL1	bar0	23	6		6,17,18,19,20,21,22,23	5	8	7	1.4	2	0,1,1,1,1,1,1	85.7143	0	1	1	0	3	1	7					0.146128
8	7	15	Wed	GL1	bar0	23	13		13,10,7,9,12,19,20,21,22,23,24	3	10	9	3	6	0,0,1,1,0,1,1,1,1	66.6667	0	0	0	0	3	1	7					0.477121
8	7	16	Wed	GL1	bar0	23	1		1,6,9,12,15,22,23	6	7	6	1	0	1,1,1,1,1,1	100	1	1	1	0	3	1	7					0
8	7	17	Wed	GL1	bar0	23	11		11,14,16,24,23	4	5	4	1	0	1,1,1,1	100	1	1	1	0	3	1	7					0
8	7	18	Wed	GL1	bar0	23	20		20,19,12,15,13,16,24,23	3	8	7	2.33333	4	0,1,1,0,1,1,1	71.4286	0	0	1	0	3	1	7					0.367977
8	7	19	Wed	GL1	bar0	23	4		4,3,7,9,12,19,20,21,22,23	7	10	9	1.28571	2	1,1,1,1,0,1,1,1,1	88.8889	0	0	1	0	3	1	7					0.109144
8	7	20	Wed	GL1	bar0	23	12		12,19,20,21,22,23,24	3	6	5	1.66667	2	0,1,1,1,1	80	0	1	0	0	3	1	7					0.221849
8	7	21	Wed	GL1	bar0	23	11	start location correct?	11,14,16,24,23,24	4	5	4	1	0	1,1,1,1	100	1	1	0	0	3	1	7					0
8	7	22	Wed	GL1	bar0	23	6		6,9,7,10,13,16,24,23	5	8	7	1.4	2	1,0,1,1,1,1,1	85.7143	0	1	1	0	3	1	7					0.146128
8	7	23	Wed	GL1	bar0	23	15		15,13,16,24,23,22	2	5	4	2	2	0,1,1,1	75	0	1	0	0	3	1	7					0.30103
8	7	24	Wed	GL1	bar0	23	7		7,10,13,15,22,23	5	6	5	1	0	1,1,1,1,1	100	1	1	1	0	3	1	7					0
8	7	25	Wed	GL1	bar0	23	11		11,8,10,13,15,22,23,22	4	7	6	1.5	2	0,1,1,1,1,1	83.3333	0	1	0	0	3	1	7					0.176091
8	7	26	Wed	GL1	bar0	23	1		1,2,3,4,5,8,11,14,16,24,23,24	6	11	10	1.66667	4	0,1,0,1,1,1,1,1,1,1	80	0	0	0	0	3	1	7					0.221849
8	7	27	Wed	GL1	bar0	23	19		19,18,17,18,19,20,21,22,23,22	4	9	8	2	4	0,0,1,1,1,1,1,1	75	0	1	0	1	3	1	7					0.30103
5	8	1	Fri	GL2	bar0	13	5		5,8,11,14,16,24,23,22,15,12,9,7,3,4,5,8,10,13	3	18	17	5.66667	14	1,0,1,1,0,0,1,1,0,0,1,0,0,1,1,1,1	58.8235	0	0	1	0	3	2	1					0.753328
5	8	2	Fri	GL2	bar0	13	22		22,23,24,16,14,11,8,5,4,3,2,1,6,17,18,19,20,21,22,23,24,16,14,11,8,5,4,3,2,1,6,17,6,9,7,10,13	2	37	36	18	34	0,1,1,0,0,1,0,0,1,0,0,1,0,1,1,0,1,1,0,1,1,0,0,1,0,0,1,0,0,1,0,1,1,1,1,1	52.7778	0	0	1	0	3	2	1					1.25527
5	8	3	Fri	GL2	bar0	13	4		4,3,2,1,6,17,18,19,20,21,22,23,24,16,13	4	15	14	3.5	10	1,0,0,1,0,1,1,0,1,1,0,1,1,1	64.2857	0	0	1	0	3	2	1					0.544068
5	8	4	Fri	GL2	bar0	13	18		18,19,20,21,22,23,22,21,22,23,24,16,14,11,8,5,4,3,2,1,6,9,12,15,22,23,22,15,13	4	29	28	7	24	1,0,1,1,0,1,0,1,0,1,1,0,0,1,0,0,1,0,0,1,1,1,1,0,0,1,1,1	57.1429	0	0	1	0	3	2	1					0.845098
5	8	5	Fri	GL2	bar0	13	5		5,8,10,13	3	4	3	1	0	1,1,1	100	1	1	1	0	3	2	1					0
5	8	6	Fri	GL2	bar0	13	23		23,22,15,13	3	4	3	1	0	1,1,1	100	1	1	1	0	3	2	1					0
5	8	7	Fri	GL2	bar0	13	12		12,9,6,1,2,3,4,5,8,11,14,16,13	2	13	12	6	10	0,0,0,1,1,0,1,1,0,1,1,1	58.3333	0	0	1	0	3	2	1					0.778151
5	8	8	Fri	GL2	bar0	13	8		8,11,14,16,13	2	5	4	2	2	0,1,1,1	75	0	1	1	0	3	2	1					0.30103
5	8	9	Fri	GL2	bar0	13	20		20,21,22,15,13	4	5	4	1	0	1,1,1,1	100	1	1	1	0	3	2	1					0
5	8	10	Fri	GL2	bar0	13	7		7,3,4,3,2,1,6,17,18,19,12,15,13,16	2	13	12	6	10	0,0,1,0,0,1,0,1,1,1,1,1	58.3333	0	0	0	1	3	2	1					0.778151
5	8	11	Fri	GL2	bar0	13	21		21,20,19,18,17,6,1,2,3,7,9,12,19,20,21,22,23,24,16,14,11,8,5,4,3,2,1,6,9,12,15,13	3	32	31	10.3333	28	0,1,0,0,1,0,1,1,1,0,1,0,0,1,1,0,1,1,0,0,1,0,0,1,0,0,1,1,1,1,1	54.8387	0	0	1	0	3	2	1					1.01424
5	8	12	Fri	GL2	bar0	13	1		1,6,17,18,19,20,21,22,15,13	5	10	9	1.8	4	1,0,1,1,0,1,1,1,1	77.7778	0	0	1	0	3	2	1					0.255273
5	8	13	Fri	GL2	bar0	13	19		19,20,19,12,9,7,10,13	3	8	7	2.33333	4	0,1,1,0,1,1,1	71.4286	0	0	1	1	3	2	1					0.367977
5	8	14	Fri	GL2	bar0	13	14		14,16,24,23,22,15,13,10	2	7	6	3	4	1,0,0,1,1,1	66.6667	0	0	0	0	3	2	1					0.477121
5	8	15	Fri	GL2	bar0	13	20		20,19,18,17,6,1,2,3,4,5,8,10,13	4	13	12	3	8	1,0,0,1,0,1,1,0,1,1,1,1	66.6667	0	0	1	0	3	2	1					0.477121
5	8	16	Fri	GL2	bar0	13	3		3,4,5,8,10,13,15	3	6	5	1.66667	2	0,1,1,1,1	80	0	1	0	0	3	2	1					0.221849
5	8	17	Fri	GL2	bar0	13	24		24,23,22,21,20,19,12,9,7,3,2,1,6,17,6,1,2,3,4,5,8,11,14,16,13	2	25	24	12	22	0,1,0,0,1,1,0,1,0,0,0,1,0,1,0,1,1,0,1,1,0,1,1,1	54.1667	0	0	1	0	3	2	1					1.07918
5	8	18	Fri	GL2	bar0	13	9		9,6,17,18,19,12,9,7,3,2,1,6,9,7,10,8,11,14,16,13	3	20	19	6.33333	16	0,0,1,1,1,0,1,0,0,0,1,1,1,1,0,0,1,1,1	57.8947	0	0	1	0	3	2	1					0.801632
5	8	19	Fri	GL2	bar0	13	5		5,4,3,7,10,13	3	6	5	1.66667	2	0,1,1,1,1	80	0	1	1	0	3	2	1					0.221849
5	8	20	Fri	GL2	bar0	13	22		22,23,24,16,13,15	2	5	4	2	2	0,1,1,1	75	0	1	0	0	3	2	1					0.30103
5	8	21	Fri	GL2	bar0	13	11		11,8,10,13	3	4	3	1	0	1,1,1	100	1	1	1	0	3	2	1					0
5	8	22	Fri	GL2	bar0	13	18		18,17,6,9,12,15,13,10	4	7	6	1.5	2	0,1,1,1,1,1	83.3333	0	1	0	0	3	2	1					0.176091
5	8	23	Fri	GL2	bar0	13	7		7,9,6,17,18,19,20,21,22,23,24,16,14,16,24,23,22,21,20,19,18,17,6,1,2,3,7,10,13,15	2	29	28	14	26	0,0,0,1,1,0,1,1,0,1,1,0,1,0,0,1,0,0,1,0,0,1,0,1,1,1,1,1	53.5714	0	0	0	0	3	2	1					1.14613
5	8	24	Fri	GL2	bar0	13	20		20,21,22,15,13	4	5	4	1	0	1,1,1,1	100	1	1	1	0	3	2	1					0
5	8	25	Fri	GL2	bar0	13	8		8,11,14,16,24,23,22,15,13,16	2	9	8	4	6	0,1,1,0,0,1,1,1	62.5	0	0	0	0	3	2	1					0.60206
6	8	1	Fri	GL2	bar0	20	9		9,7,10,13,16,24,23,22,15,13,10,7,3,4,5,8,10,13,15,22,21,20	3	22	21	7	18	0,0,1,0,1,1,1,0,0,0,1,0,0,0,1,1,1,1,1,1,1	57.1429	0	0	1	0	3	2	1					0.845098
6	8	2	Fri	GL2	bar0	20	24		24,16,14,11,8,10,7,9,6,17,18,19,20	4	13	12	3	8	0,0,0,1,1,1,1,0,1,1,1,1	66.6667	0	0	1	0	3	2	1					0.477121
6	8	3	Fri	GL2	bar0	20	2		2,3,7,9,6,1,2,1,6,17,18,19,20	6	13	12	2	6	1,1,1,0,0,0,1,1,1,1,1,1	75	0	0	1	0	3	2	1					0.30103
6	8	4	Fri	GL2	bar0	20	22		22,21,20	2	3	2	1	0	1,1	100	1	1	1	0	3	2	1					0
6	8	5	Fri	GL2	bar0	20	4		4,3,2,1,6,9,12,15,22,23,24,16,14,11,14,16,24,23,22,21,20	6	21	20	3.33333	14	1,0,1,1,1,1,0,1,0,0,0,0,0,1,1,1,1,1,1,1	65	0	0	1	0	3	2	1					0.522879
6	8	6	Fri	GL2	bar0	20	13		13,16,24,23,22,15,13,10,8,11,14,16,13,15,12,19,18,19,20	4	19	18	4.5	14	0,1,1,1,0,0,0,0,0,1,1,1,1,1,1,0,1,1	61.1111	0	0	1	0	3	2	1					0.653213
6	8	7	Fri	GL2	bar0	20	17		17,6,9,12,19,20	3	6	5	1.66667	2	0,1,1,1,1	80	0	1	1	0	3	2	1					0.221849
6	8	8	Fri	GL2	bar0	20	23		23,22,15,13,10,8,11,14,16,24,23,22,21,20,19	3	14	13	4.33333	10	1,0,0,0,0,0,1,1,1,1,1,1,1	61.5385	0	0	0	0	3	2	1					0.636822
6	8	9	Fri	GL2	bar0	20	7		7,10,13,15,12,9,7,10,8,5,4,3,2,1,6,17,18,19,20	4	19	18	4.5	14	0,1,1,1,0,0,0,0,0,1,1,0,1,1,1,1,1,1	61.1111	0	0	1	0	3	2	1					0.653213
6	8	10	Fri	GL2	bar0	20	4		4,5,8,10,13,16,24,23,22,21,20	6	11	10	1.66667	4	0,1,1,1,0,1,1,1,1,1	80	0	0	1	0	3	2	1					0.221849
6	8	11	Fri	GL2	bar0	20	22		22,21,20,19	2	3	2	1	0	1,1	100	1	1	0	0	3	2	1					0
6	8	12	Fri	GL2	bar0	20	13		13,16,14,11,8,5,4,3,7,10,13,16,24,23,22,21,20	4	17	16	4	12	0,0,0,1,0,1,1,1,0,1,0,1,1,1,1,1	62.5	0	0	1	0	3	2	1					0.60206
6	8	13	Fri	GL2	bar0	20	17		17,6,9,12,15,22,21,20	3	8	7	2.33333	4	0,1,1,0,1,1,1	71.4286	0	0	1	0	3	2	1					0.367977
6	8	14	Fri	GL2	bar0	20	3	ate at 3	3,4,5,8,10,13,15,22,23,24,16,14,11,8,10,7,3,4,5,8,11,14,16,24,23,22,21,20	5	28	27	5.4	22	0,0,1,1,1,1,1,0,0,0,0,0,1,1,1,0,0,0,1,0,1,1,1,1,1,1,1	59.2593	0	0	1	0	3	2	1					0.732394
6	8	15	Fri	GL2	bar0	20	15		15,22,23,24,16,14,11,8,5,4,3,7,10,13,15,22,21,20	3	18	17	5.66667	14	1,0,0,0,0,0,1,0,1,1,1,0,1,1,1,1,1	58.8235	0	0	1	0	3	2	1					0.753328
6	8	16	Fri	GL2	bar0	20	4		4,3,2,1,6,17,18,19,20,21	6	9	8	1.33333	2	1,0,1,1,1,1,1,1	87.5	0	1	0	0	3	2	1					0.124939
6	8	17	Fri	GL2	bar0	20	22		22,23,22,21,20	2	5	4	2	2	0,1,1,1	75	0	1	1	1	3	2	1					0.30103
6	8	18	Fri	GL2	bar0	20	6		6,17,18,19,20	4	5	4	1	0	1,1,1,1	100	1	1	1	0	3	2	1					0
6	8	19	Fri	GL2	bar0	20	24		24,23,22,15,12,9,6,1,2,3,4,5,8,10,13,15,22,21,20	4	19	18	4.5	14	1,1,0,1,0,0,0,0,1,0,0,1,1,1,1,1,1,1	61.1111	0	0	1	0	3	2	1					0.653213
6	8	20	Fri	GL2	bar0	20	18		18,19,20,21	2	3	2	1	0	1,1	100	1	1	0	0	3	2	1					0
6	8	21	Fri	GL2	bar0	20	13	took him from high wall at 15	13,16,24,23,22,15,22,15,22,15,22,15,22,15	4	14	50	12.5	46	0,1,1,1,0,1,0,1,0,1,0,1,0	53.8462	0	0	0	0	3	2	1	1				1.09691
6	8	22	Fri	GL2	bar0	20	3		3,2,1,6,9,12,19,20,21	5	8	7	1.4	2	0,1,1,1,1,1,1	85.7143	0	1	0	0	3	2	1					0.146128
6	8	23	Fri	GL2	bar0	20	23	climbed high wall at 21, managed to get down this time	23,22,21,20	3	4	3	1	0	1,1,1	100	1	1	1	0	3	2	1					0
6	8	24	Fri	GL2	bar0	20	5		5,4,3,7,10,13,15,22,21,20	7	10	9	1.28571	2	1,1,1,0,1,1,1,1,1	88.8889	0	0	1	0	3	2	1					0.109144
6	8	25	Fri	GL2	bar0	20	9		9,6,1,2,3,4,5,8,10,13,15,22,21,20,21	3	14	13	4.33333	10	0,0,0,1,0,0,1,1,1,1,1,1,1	61.5385	0	0	0	0	3	2	1					0.636822
7	8	1	Fri	GL2	bar0	5	1	ib	1,2,3,7,9,12,19,12,15,22,21,20,19,18,19,20,21,22,23,24,16,14,11,8,5	4	25	24	6	20	1,1,0,0,0,0,1,1,0,0,0,1,0,1,0,1,1,0,1,1,1,1,1,1	58.3333	0	0	1	0	3	2	1					0.778151
7	8	2	Fri	GL2	bar0	5	22		22,21,20,19,12,15,22,21,20,19,18,17,6,9,7,3,4,5,8	5	18	17	3.4	12	0,0,1,1,1,0,0,0,1,0,1,1,1,1,1,1,1	64.7059	0	0	0	0	3	2	1					0.531479
7	8	3	Fri	GL2	bar0	5	7		7,10,13,15,12,19,18,17,6,1,2,3,7,9,6,17,18,19,20,21,22,23,24,16,14,11,8,5	3	28	27	9	24	1,0,0,0,0,0,1,1,1,1,1,0,0,0,0,0,1,0,1,1,0,1,1,1,1,1,1	55.5556	0	0	1	0	3	2	1					0.954243
7	8	4	Fri	GL2	bar0	5	15		15,12,19,18,17,6,9,12,19,20,21,22,15,13,10,8,5	4	17	16	4	12	0,0,0,1,1,1,0,0,0,1,1,1,1,1,1,1	62.5	0	0	1	0	3	2	1					0.60206
7	8	5	Fri	GL2	bar0	5	3		3,2,1,6,17,18,19,20,21,22,23,24,16,14,11,8,5	2	17	16	8	14	0,0,0,0,0,1,0,1,1,0,1,1,1,1,1,1	56.25	0	0	1	0	3	2	1					0.90309
7	8	6	Fri	GL2	bar0	5	14		14,16,13,10,8,5	3	6	5	1.66667	2	0,1,1,1,1	80	0	1	1	0	3	2	1					0.221849
7	8	7	Fri	GL2	bar0	5	18		18,19,20,21,22,23,24,16,13,15,13,16,14,11,8,5	7	16	15	2.14286	8	1,0,1,1,0,1,1,1,0,1,0,1,1,1,1	73.3333	0	0	1	0	3	2	1					0.330993
7	8	8	Fri	GL2	bar0	5	21		21,22,23,24,16,14,11,8,5	6	9	8	1.33333	2	1,0,1,1,1,1,1,1	87.5	0	1	1	0	3	2	1					0.124939
7	8	9	Fri	GL2	bar0	5	3		3,2,1,2,3,4,5	2	7	6	3	4	0,0,1,1,1,1	66.6667	0	1	1	1	3	2	1					0.477121
7	8	10	Fri	GL2	bar0	5	13	got stuck with my coat at 16 and pulled gangway out of the bearings, fixed it immediately, mouse seemed unaffected (11)	13,16,24,23,22,15,12,9,6,17,18,19,12,15,22,21,20,19,12,15,13,10,8,5	3	24	23	7.66667	20	0,0,0,1,1,0,1,0,0,0,1,1,1,0,0,0,1,1,1,1,1,1,1	56.5217	0	0	1	0	3	2	1					0.884607
7	8	11	Fri	GL2	bar0	5	6		6,17,18,19,20,19,12,9,7,3,4,5	5	12	11	2.2	6	0,0,1,0,1,1,1,1,1,1,1	72.7273	0	0	1	0	3	2	1					0.342423
7	8	12	Fri	GL2	bar0	5	22		22,15,13,10,8,5	5	6	5	1	0	1,1,1,1,1	100	1	1	1	0	3	2	1					0
7	8	13	Fri	GL2	bar0	5	14		14,16,13,10,8,5	3	6	5	1.66667	2	0,1,1,1,1	80	0	1	1	0	3	2	1					0.221849
7	8	14	Fri	GL2	bar0	5	19		19,20,21,22,23,24,23,22,15,13,16,24,23,22,21,20,21,22,23,24,16,14,11,8,5,4	6	25	24	4	18	0,1,1,0,1,0,1,1,1,0,0,0,1,0,0,1,1,0,1,1,1,1,1,1	62.5	0	0	0	0	3	2	1					0.60206
7	8	15	Fri	GL2	bar0	5	2		2,3,7,10,8,5	3	6	5	1.66667	2	1,0,1,1,1	80	0	1	1	0	3	2	1					0.221849
7	8	16	Fri	GL2	bar0	5	10		10,8,5	2	3	2	1	0	1,1	100	1	1	1	0	3	2	1					0
7	8	17	Fri	GL2	bar0	5	20	direct run	20,21,22,15,13,10,8,5,4	7	8	7	1	0	1,1,1,1,1,1,1	100	1	1	0	0	3	2	1					0
7	8	18	Fri	GL2	bar0	5	1		1,2,3,4,5,8	4	5	4	1	0	1,1,1,1	100	1	1	0	0	3	2	1					0
7	8	19	Fri	GL2	bar0	5	16		16,24,23,22,23,24,16,13,10,7,9,6,17,18,19,12,19,18,17,6,1,2,3,4,5	4	25	24	6	20	0,0,1,0,1,1,1,1,0,0,0,0,0,1,1,0,0,1,1,1,1,1,1,1	58.3333	0	0	1	0	3	2	1					0.778151
7	8	20	Fri	GL2	bar0	5	3		3,4,5	2	3	2	1	0	1,1	100	1	1	1	0	3	2	1					0
7	8	21	Fri	GL2	bar0	5	15		15,22,15,13,10,8,5,4	4	7	6	1.5	2	0,1,1,1,1,1	83.3333	0	1	0	1	3	2	1					0.176091
7	8	22	Fri	GL2	bar0	5	23		23,22,21,20,19,12,19,18,17,6,1,2,3,7,10,13,15,12,19,18,19,20,21,22,23,24,16,13,15,12,19,12,9,7,3,4,5	6	37	36	6	30	1,0,0,1,1,0,0,1,1,1,1,1,0,1,0,0,0,0,0,1,0,1,1,0,1,1,1,0,0,0,1,1,1,1,1,1	58.3333	0	0	1	0	3	2	1					0.778151
7	8	23	Fri	GL2	bar0	5	14		14,16,13,15,22,23,24,16,14,11,8,5	3	12	11	3.66667	8	0,1,0,0,0,1,1,1,1,1,1	63.6364	0	0	1	0	3	2	1					0.564271
8	8	1	Fri	GL2	bar0	9	11		11,8,10,7,9	4	5	4	1	0	1,1,1,1	100	1	1	1	0	3	2	1					0
8	8	2	Fri	GL2	bar0	9	20		20,21,22,23,24,16,14,11,8,10,13,15,22,23,24,16,14,11,8,10,13,15,22,23,24,16,13,15,22,23,22,21,20,19,18,17,6,9	3	38	37	12.3333	34	0,1,0,0,1,0,1,1,1,0,1,0,0,0,1,0,1,1,1,0,1,0,0,0,1,1,1,0,0,1,0,1,1,0,1,1,1	54.0541	0	0	1	0	3	2	1					1.09108
8	8	3	Fri	GL2	bar0	9	5		5,4,3,7,10,13,16,24,23,22,21,20,19,18,17,6,1,2,3,4,5,8,11,14,16,24,23,22,21,20,19,12,9	4	33	32	8	28	1,1,1,0,0,0,0,1,1,0,1,1,0,1,1,0,0,1,0,0,1,0,0,1,0,1,1,0,1,1,1,1	56.25	0	0	1	0	3	2	1					0.90309
8	8	4	Fri	GL2	bar0	9	23		23,24,16,13,15,22,23,22,15,13,10,8,5,4,3,7,9	4	17	16	4	12	0,1,1,1,0,0,1,1,0,1,0,0,1,1,1,1	62.5	0	0	1	0	3	2	1					0.60206
8	8	5	Fri	GL2	bar0	9	3		3,2,1,6,17,18,19,20,21,22,23,24,16,14,11,8,10,7,9	2	19	18	9	16	0,1,1,0,0,1,0,0,1,0,0,1,0,1,1,1,1,1	55.5556	0	0	1	0	3	2	1					0.954243
8	8	6	Fri	GL2	bar0	9	15		15,13,10,7,3,4,5,8,11,14,16,24,23,22,15,12,9	2	17	16	8	14	0,1,1,0,0,0,1,0,0,1,0,1,1,1,1,1	56.25	0	0	1	0	3	2	1					0.90309
8	8	7	Fri	GL2	bar0	9	8		8,5,4,3,7,9	3	6	5	1.66667	2	0,1,1,1,1	80	0	1	1	0	3	2	1					0.221849
8	8	8	Fri	GL2	bar0	9	19		19,18,17,6,1,2,1,6,17,18,19,20,21,22,15,12,9	2	17	16	8	14	0,1,1,0,0,1,1,0,0,1,0,0,1,1,1,1	56.25	0	0	1	0	3	2	1					0.90309
8	8	9	Fri	GL2	bar0	9	2		2,3,4,5,8,11,14,16,24,23,22,15,13,10,7,9	3	16	15	5	12	1,0,0,1,0,0,1,0,1,1,1,0,1,1,1	60	0	0	1	0	3	2	1					0.69897
8	8	10	Fri	GL2	bar0	9	15		15,13,10,7,3,2,1,6,17,18,19,12,15,13,16,24,23,22,21,20,19,18,17,6,9	2	25	24	12	22	0,1,1,0,0,1,1,0,0,1,1,0,0,0,0,1,1,0,1,1,0,1,1,1	54.1667	0	0	1	0	3	2	1					1.07918
8	8	11	Fri	GL2	bar0	9	4		4,5,8,11,14,16,24,23,22,15,12,9	3	12	11	3.66667	8	0,1,0,0,1,0,1,1,1,1,1	63.6364	0	0	1	0	3	2	1					0.564271
8	8	12	Fri	GL2	bar0	9	13		13,16,14,11,8,10,13,15,22,23,22,15,12,9	3	14	13	4.33333	10	0,0,1,1,1,0,1,0,0,1,1,1,1	61.5385	0	0	1	0	3	2	1					0.636822
8	8	13	Fri	GL2	bar0	9	17		17,6,1,2,3,4,5,8,10,13,15,12,9	2	13	12	6	10	1,0,0,1,0,0,1,1,0,1,1,1	58.3333	0	0	1	0	3	2	1					0.778151
8	8	14	Fri	GL2	bar0	9	11		11,8,10,7,9	4	5	4	1	0	1,1,1,1	100	1	1	1	0	3	2	1					0
8	8	15	Fri	GL2	bar0	9	18		18,19,12,15,13,16,24,23,22,15,12,9	3	12	11	3.66667	8	1,1,0,0,0,0,1,1,1,1,1	63.6364	0	0	1	0	3	2	1					0.564271
8	8	16	Fri	GL2	bar0	9	22		22,23,24,16,13,10,7,3,2,1,6,17,18,19,12,9	3	16	15	5	12	0,0,1,1,1,1,0,0,1,1,0,0,1,1,1	60	0	0	1	0	3	2	1					0.69897
8	8	17	Fri	GL2	bar0	9	3		3,2,1,6,17,18,19,20,21,22,23,22,15,12,9	2	15	14	7	12	0,1,1,0,0,1,0,0,1,0,1,1,1,1	57.1429	0	0	1	0	3	2	1					0.845098
8	8	18	Fri	GL2	bar0	9	13		13,10,7,3,2,1,6,17,18,19,12,15,22,21,20,19,12,9	3	18	17	5.66667	14	1,1,0,0,1,1,0,0,1,1,0,0,0,1,1,1,1	58.8235	0	0	1	0	3	2	1					0.753328
8	8	19	Fri	GL2	bar0	9	8		8,5,4,3,2,1,6,17,18,19,20,21,22,21,20,19,12,9,7	3	18	17	5.66667	14	0,1,1,0,1,1,0,0,1,0,0,1,0,1,1,1,1	58.8235	0	0	0	0	3	2	1					0.753328
8	8	20	Fri	GL2	bar0	9	19		19,20,21,22,23,24,23,22,15,13,10,7,9	2	13	12	6	10	0,0,1,0,0,1,1,1,0,1,1,1	58.3333	0	0	1	0	3	2	1					0.778151
8	8	21	Fri	GL2	bar0	9	2		2,1,6,17,18,19,20,21,22,23,22,15,12,9	3	14	13	4.33333	10	1,1,0,0,1,0,0,1,0,1,1,1,1	61.5385	0	0	1	0	3	2	1					0.636822
8	8	22	Fri	GL2	bar0	9	23		23,24,16,13,15,12,19,18,17,6,1,2,3,4,5,8,10,7,9,6	4	19	18	4.5	14	0,1,1,1,1,0,0,1,1,0,0,1,0,0,1,1,1,1	61.1111	0	0	0	0	3	2	1					0.653213
8	8	23	Fri	GL2	bar0	9	10		10,8,5,4,3,7,9	2	7	6	3	4	0,0,1,1,1,1	66.6667	0	1	1	0	3	2	1					0.477121
8	8	24	Fri	GL2	bar0	9	21		21,20,19,18,17,6,9,12	4	7	6	1.5	2	1,1,0,1,1,1	83.3333	0	0	0	0	3	2	1					0.176091
8	8	25	Fri	GL2	bar0	9	3		3,2,1,6,17,18,19,12,15,22,23,22,23,24,23,22,15,12,9	2	19	18	9	16	0,1,1,0,0,1,1,0,0,0,1,0,0,1,1,1,1,1	55.5556	0	0	1	0	3	2	1					0.954243
8	8	26	Fri	GL2	bar0	9	8		8,10,13,15,22,21,20,19,12,9,7	3	10	9	3	6	1,0,1,0,0,1,1,1,1	66.6667	0	0	0	0	3	2	1					0.477121
5	9	1	Mon	GL2	bar0	13	18	PROBE	18,19,20,21,22,23,24,16,13,15	4	9	8	2	4	1,0,1,1,0,1,1,1	75	0	0	0	0	3	2	2			1		0.30103
5	9	2	Mon	GL2	bar0	13	5		5,4,3,7,10,13	3	6	5	1.66667	2	0,1,1,1,1	80	0	1	1	0	3	2	2					0.221849
5	9	3	Mon	GL2	bar0	13	12		12,9,7,10,13	2	5	4	2	2	0,1,1,1	75	0	1	1	0	3	2	2					0.30103
5	9	4	Mon	GL2	bar0	13	8		8,5,4,3,2,1,6,17,18,19,20,21,22,23,24,16,14,11,8,5,4,3,2,1,6,17,18,19,20,21,22,23,24,16,13	2	35	34	17	32	0,0,1,0,0,1,0,1,1,0,1,1,0,1,1,0,0,1,0,0,1,0,0,1,0,1,1,0,1,1,0,1,1,1	52.9412	0	0	1	0	3	2	2					1.23045
5	9	5	Mon	GL2	bar0	13	18		18,19,20,21,22,23,24,16,13	4	9	8	2	4	1,0,1,1,0,1,1,1	75	0	0	1	0	3	2	2					0.30103
5	9	6	Mon	GL2	bar0	13	21		21,22,15,13	3	4	3	1	0	1,1,1	100	1	1	1	0	3	2	2					0
5	9	7	Mon	GL2	bar0	13	14		14,16,24,23,22,15,13	2	7	6	3	4	1,0,0,1,1,1	66.6667	0	0	1	0	3	2	2					0.477121
5	9	8	Mon	GL2	bar0	13	17		17,6,9,12,15,13,10	5	6	5	1	0	1,1,1,1,1	100	1	1	0	0	3	2	2					0
5	9	9	Mon	GL2	bar0	13	5	PROBE	5,4,3,7,10,13,16	3	6	5	1.66667	2	0,1,1,1,1	80	0	1	0	0	3	2	2			9		0.221849
5	9	10	Mon	GL2	bar0	13	22		22,23,24,16,13	2	5	4	2	2	0,1,1,1	75	0	1	1	0	3	2	2					0.30103
5	9	11	Mon	GL2	bar0	13	4		4,3,7,10,13	4	5	4	1	0	1,1,1,1	100	1	1	1	0	3	2	2					0
5	9	12	Mon	GL2	bar0	13	18		18,17,6,1,2,3,4,5,8,10,13	4	11	10	2.5	6	0,1,0,1,1,0,1,1,1,1	70	0	0	1	0	3	2	2					0.39794
5	9	13	Mon	GL2	bar0	13	8		8,11,14,16,24,23,22,21,22,23,22,15,13,16	2	13	12	6	10	0,1,1,0,0,1,0,1,0,1,1,1	58.3333	0	0	0	0	3	2	2					0.778151
5	9	14	Mon	GL2	bar0	13	23		23,22,21,20,19,12,15,22,23,22,15,13	3	12	11	3.66667	8	1,0,0,1,1,1,0,0,1,1,1	63.6364	0	0	1	0	3	2	2					0.564271
5	9	15	Mon	GL2	bar0	13	2		2,1,6,17,18,19,12,9,6,1,6,9,7,10,13	4	15	14	3.5	10	0,1,0,1,1,1,0,0,0,1,1,1,1,1	64.2857	0	0	1	0	3	2	2					0.544068
5	9	16	Mon	GL2	bar0	13	8		8,5,4,3,7,10,13	2	7	6	3	4	0,0,1,1,1,1	66.6667	0	1	1	0	3	2	2					0.477121
5	9	17	Mon	GL2	bar0	13	12		12,19,20,21,22,23,24,16,13	2	9	8	4	6	0,0,1,1,0,1,1,1	62.5	0	0	1	0	3	2	2					0.60206
5	9	18	Mon	GL2	bar0	13	21		21,20,19,18,17,6,9,7,10,13	3	10	9	3	6	0,1,0,0,1,1,1,1,1	66.6667	0	0	1	0	3	2	2					0.477121
5	9	19	Mon	GL2	bar0	13	7		7,3,4,5,8,10,13,15	2	7	6	3	4	0,0,1,1,1,1	66.6667	0	1	0	0	3	2	2					0.477121
5	9	20	Mon	GL2	bar0	13	14		14,16,13	2	3	2	1	0	1,1	100	1	1	1	0	3	2	2					0
5	9	21	Mon	GL2	bar0	13	18		18,17,6,9,12,15,13	4	7	6	1.5	2	0,1,1,1,1,1	83.3333	0	1	1	0	3	2	2					0.176091
5	9	22	Mon	GL2	bar0	13	22		22,23,24,16,13,10	2	5	4	2	2	0,1,1,1	75	0	1	0	0	3	2	2					0.30103
5	9	23	Mon	GL2	bar0	13	7		7,3,4,5,8,10,13	2	7	6	3	4	0,0,1,1,1,1	66.6667	0	1	1	0	3	2	2					0.477121
5	9	24	Mon	GL2	bar0	13	24		24,23,22,15,13	2	5	4	2	2	0,1,1,1	75	0	1	1	0	3	2	2					0.30103
6	9	1	Mon	GL2	bar0	20	24	PROBE	24,23,22,15,12,9,7,10,13,15,22,21,20,19	4	13	12	3	8	1,1,0,1,0,0,0,1,1,1,1,1	66.6667	0	0	0	0	3	2	2			1		0.477121
6	9	2	Mon	GL2	bar0	20	3		3,2,1,6,17,18,19,20	5	8	7	1.4	2	0,1,1,1,1,1,1	85.7143	0	1	1	0	3	2	2					0.146128
6	9	3	Mon	GL2	bar0	20	9		9,7,3,4,5,8,11,14,16,24,23,22,21,20,19	3	14	13	4.33333	10	0,0,0,0,1,0,1,1,1,1,1,1,1	61.5385	0	0	0	0	3	2	2					0.636822
6	9	4	Mon	GL2	bar0	20	23		23,22,15,13,10,8,5,4,3,2,1,2,3,7,9,12,19,20,21	3	18	17	5.66667	14	1,0,0,0,0,0,1,1,0,1,0,1,1,1,1,1,1	58.8235	0	0	0	0	3	2	2					0.753328
6	9	5	Mon	GL2	bar0	20	5		5,4,3,7,10,13,16,14,11,14,16,24,23,22,21,20	7	16	15	2.14286	8	1,1,1,0,1,0,0,0,1,1,1,1,1,1,1	73.3333	0	0	1	0	3	2	2					0.330993
6	9	6	Mon	GL2	bar0	20	17		17,18,19,20	3	4	3	1	0	1,1,1	100	1	1	1	0	3	2	2					0
6	9	7	Mon	GL2	bar0	20	16		16,24,23,22,21,20	5	6	5	1	0	1,1,1,1,1	100	1	1	1	0	3	2	2					0
6	9	8	Mon	GL2	bar0	20	4		4,3,7,10,8,11,14,16,13,15,22,21,20	6	13	12	2	6	1,1,0,0,0,1,1,1,1,1,1,1	75	0	0	1	0	3	2	2					0.30103
6	9	9	Mon	GL2	bar0	20	17	PROBE	17,18,19,20,21	3	4	3	1	0	1,1,1	100	1	1	0	0	3	2	2			9		0
6	9	10	Mon	GL2	bar0	20	15		15,13,10,8,5,4,3,2,1,6,17,18,19,20,21	3	14	13	4.33333	10	0,0,0,0,1,1,0,1,1,1,1,1,1	61.5385	0	0	0	0	3	2	2					0.636822
6	9	11	Mon	GL2	bar0	20	3		3,2,1,6,17,18,19,20	5	8	7	1.4	2	0,1,1,1,1,1,1	85.7143	0	1	1	0	3	2	2					0.146128
6	9	12	Mon	GL2	bar0	20	24		24,23,22,21,20	4	5	4	1	0	1,1,1,1	100	1	1	1	0	3	2	2					0
6	9	13	Mon	GL2	bar0	20	6		6,17,18,19,20,21	4	5	4	1	0	1,1,1,1	100	1	1	0	0	3	2	2					0
6	9	14	Mon	GL2	bar0	20	4		4,3,7,10,13,16,24,16,14,11,8,10,7,9,12,19,20	6	17	16	2.66667	10	1,1,0,1,0,1,0,0,0,1,1,1,1,1,1,1	68.75	0	0	1	0	3	2	2					0.425969
6	9	15	Mon	GL2	bar0	20	14		14,11,8,10,13,15,22,21,20	6	9	8	1.33333	2	0,1,1,1,1,1,1,1	87.5	0	1	1	0	3	2	2					0.124939
6	9	16	Mon	GL2	bar0	20	18		18,17,6,1,2,3,7,10,13,16,24,23,22,21,20,19	2	15	14	7	12	0,0,0,0,1,1,0,1,0,1,1,1,1,1	57.1429	0	0	0	0	3	2	2					0.845098
6	9	17	Mon	GL2	bar0	20	4		4,5,8,10,13,16,24,23,22,21,20,21	6	11	10	1.66667	4	0,1,1,1,0,1,1,1,1,1	80	0	0	0	0	3	2	2					0.221849
6	9	18	Mon	GL2	bar0	20	22		22,21,20,19	2	3	2	1	0	1,1	100	1	1	0	0	3	2	2					0
6	9	19	Mon	GL2	bar0	20	8		8,11,14,16,24,23,24,16,13,15,22,21,20	6	13	12	2	6	0,1,1,1,1,0,0,1,1,1,1,1	75	0	0	1	0	3	2	2					0.30103
6	9	20	Mon	GL2	bar0	20	12		12,15,22,21,20	2	5	4	2	2	0,1,1,1	75	0	1	1	0	3	2	2					0.30103
6	9	21	Mon	GL2	bar0	20	4		4,3,2,1,2,3,4,5,8,11,14,16,13,15,12,19,20	6	17	16	2.66667	10	1,0,1,0,1,0,0,1,0,1,1,1,1,1,1,1	68.75	0	0	1	0	3	2	2					0.425969
7	9	1	Mon	GL2	bar0	5	22	PROBE	22,23,24,16,13,10,8,5,4	5	8	7	1.4	2	0,1,1,1,1,1,1	85.7143	0	1	0	0	3	2	2			1		0.146128
7	9	2	Mon	GL2	bar0	5	2		2,1,6,9,12,15,22,23,24,16,14,11,8,5	3	14	13	4.33333	10	0,0,1,0,1,0,0,1,1,1,1,1,1	61.5385	0	0	1	0	3	2	2					0.636822
7	9	3	Mon	GL2	bar0	5	19		19,20,21,22,23,24,16,14,11,8,5	6	11	10	1.66667	4	0,1,1,0,1,1,1,1,1,1	80	0	0	1	0	3	2	2					0.221849
7	9	4	Mon	GL2	bar0	5	11		11,8,5,4	2	3	2	1	0	1,1	100	1	1	0	0	3	2	2					0
7	9	5	Mon	GL2	bar0	5	21		21,22,15,12,19,20,21,22,15,13,16,24,16,14,11,8,5	6	17	16	2.66667	10	1,1,0,0,0,1,1,1,1,0,0,1,1,1,1,1	68.75	0	0	1	0	3	2	2					0.425969
7	9	6	Mon	GL2	bar0	5	7		7,9,6,1,2,3,4,5,8	3	8	7	2.33333	4	0,0,1,1,1,1,1	71.4286	0	1	0	0	3	2	2					0.367977
7	9	7	Mon	GL2	bar0	5	14		14,16,13,15,12,19,20,21,22,23,24,16,13,15,22,23,24,16,14,11,8,5	3	22	21	7	18	0,1,0,0,0,0,1,1,0,1,1,1,0,0,0,1,1,1,1,1,1	57.1429	0	0	1	0	3	2	2					0.845098
7	9	8	Mon	GL2	bar0	5	22		22,23,24,16,13,10,8,5	5	8	7	1.4	2	0,1,1,1,1,1,1	85.7143	0	1	1	0	3	2	2					0.146128
7	9	9	Mon	GL2	bar0	5	1	PROBE	1,6,17,18,19,20,21,22,15,12,19,20,19,12,15,22,23,24,16,14,11,8,5,4	4	23	22	5.5	18	0,0,0,1,0,1,1,1,0,0,0,1,1,1,0,0,1,1,1,1,1,1	59.0909	0	0	0	0	3	2	2			9		0.740363
7	9	10	Mon	GL2	bar0	5	23		23,24,23,22,21,20,19,18,17,6,9,7,10,8,5	6	15	14	2.33333	8	1,0,1,0,0,1,0,1,1,1,1,1,1,1	71.4286	0	0	1	1	3	2	2					0.367977
7	9	11	Mon	GL2	bar0	5	10		10,13,16,24,23,22,15,12,9,7,3,4,5	2	13	12	6	10	0,0,0,0,1,1,0,1,1,1,1,1	58.3333	0	0	1	0	3	2	2					0.778151
7	9	12	Mon	GL2	bar0	5	21		21,22,15,13,16,14,11,8,5	6	9	8	1.33333	2	1,1,1,0,1,1,1,1	87.5	0	0	1	0	3	2	2					0.124939
7	9	13	Mon	GL2	bar0	5	6		6,17,18,19,20,19,12,15,22,21,20,19,18,17,6,1,2,3,4,5	5	20	19	3.8	14	0,0,1,0,1,1,1,0,0,0,1,0,1,1,1,1,1,1,1	63.1579	0	0	1	0	3	2	2					0.579784
7	9	14	Mon	GL2	bar0	5	14		14,16,24,23,22,21,20,19,18,17,6,1,2,3,4,5	3	16	15	5	12	0,0,0,1,0,0,1,0,1,1,1,1,1,1,1	60	0	0	1	0	3	2	2					0.69897
7	9	15	Mon	GL2	bar0	5	18		18,17,6,9,7,10,13,15,12,9,6,1,2,3,4,5,8	7	16	15	2.14286	8	1,1,1,1,1,0,0,0,1,0,1,1,1,1,1	73.3333	0	0	0	0	3	2	2					0.330993
7	9	16	Mon	GL2	bar0	5	10		10,13,15,12,9,6,17,18,19,20,21,22,23,24,16,14,11,8,5	2	19	18	9	16	0,0,0,1,0,0,0,1,0,1,1,0,1,1,1,1,1,1	55.5556	0	0	1	0	3	2	2					0.954243
7	9	17	Mon	GL2	bar0	5	2		2,3,4,5	3	4	3	1	0	1,1,1	100	1	1	1	0	3	2	2					0
7	9	18	Mon	GL2	bar0	5	24		24,23,22,21,20,21,22,23,24,16,14,11,8,5,4	5	14	13	2.6	8	0,1,0,0,1,1,0,1,1,1,1,1,1	69.2308	0	0	0	0	3	2	2					0.414973
8	9	1	Mon	GL2	bar0	9	20	PROBE	20,21,22,23,24,16,13,15,22,23,24,23,22,21,20,19,18,17,6,9,12	3	20	19	6.33333	16	0,1,0,0,1,1,1,0,0,0,1,1,0,1,1,0,1,1,1	57.8947	0	0	0	0	3	2	2			1		0.801632
8	9	2	Mon	GL2	bar0	9	13		13,10,7,9	3	4	3	1	0	1,1,1	100	1	1	1	0	3	2	2					0
8	9	3	Mon	GL2	bar0	9	2		2,3,7,9	3	4	3	1	0	1,1,1	100	1	1	1	0	3	2	2					0
8	9	4	Mon	GL2	bar0	9	20		20,21,22,23,22,15,12,9	3	8	7	2.33333	4	0,1,0,1,1,1,1	71.4286	0	0	1	0	3	2	2					0.367977
8	9	5	Mon	GL2	bar0	9	4		4,5,8,10,13,15,22,23,24,16,13,10,7,9	3	14	13	4.33333	10	0,1,1,0,1,0,0,0,1,1,1,1,1	61.5385	0	0	1	0	3	2	2					0.636822
8	9	6	Mon	GL2	bar0	9	14		14,11,8,10,7,9	5	6	5	1	0	1,1,1,1,1	100	1	1	1	0	3	2	2					0
8	9	7	Mon	GL2	bar0	9	19		19,20,21,22,15,12,9	2	7	6	3	4	0,0,1,1,1,1	66.6667	0	1	1	0	3	2	2					0.477121
8	9	8	Mon	GL2	bar0	9	4	long time grooming a 4	4,3,7,9,6	3	4	3	1	0	1,1,1	100	1	1	0	0	3	2	2					0
8	9	9	Mon	GL2	bar0	9	11	PROBE	11,8,10,13,15,22,21,20,19,18,17,6,9,12	4	13	12	3	8	1,1,0,1,0,0,1,1,0,1,1,1	66.6667	0	0	0	0	3	2	2			9		0.477121
8	9	10	Mon	GL2	bar0	9	17	accidentally put food in 5, removed before mouse back in maze ?probe trial feeling? repeated	17,6,9	2	3	2	1	0	1,1	100	1	1	1	0	3	2	2					0
8	9	11	Mon	GL2	bar0	9	23		23,24,16,13,15,22,21,20,19,18,17,6,9	4	13	12	3	8	0,1,1,1,0,0,1,1,0,1,1,1	66.6667	0	0	1	0	3	2	2					0.477121
8	9	12	Mon	GL2	bar0	9	10		10,8,11,14,16,24,23,22,15,12,9	2	11	10	5	8	0,0,0,1,0,1,1,1,1,1	60	0	0	1	0	3	2	2					0.69897
8	9	13	Mon	GL2	bar0	9	20		20,19,12,9,6	3	4	3	1	0	1,1,1	100	1	1	0	0	3	2	2					0
8	9	14	Mon	GL2	bar0	9	3		3,2,1,6,9,12	2	5	4	2	2	0,1,1,1	75	0	1	0	0	3	2	2					0.30103
8	9	15	Mon	GL2	bar0	9	15		15,22,23,22,15,12,9,6	2	7	6	3	4	0,0,1,1,1,1	66.6667	0	1	0	1	3	2	2					0.477121
8	9	16	Mon	GL2	bar0	9	5		5,8,10,7,9	4	5	4	1	0	1,1,1,1	100	1	1	1	0	3	2	2					0
8	9	17	Mon	GL2	bar0	9	18		18,19,20,21,22,23,22,15,13,10,7,3,2,3,7,9,6	3	16	15	5	12	1,0,0,1,0,1,1,0,1,1,0,0,1,1,1	60	0	0	0	0	3	2	2					0.69897
8	9	18	Mon	GL2	bar0	9	22		22,23,24,16,24,23,22,15,12,9,6	3	10	9	3	6	0,0,1,0,1,1,1,1,1	66.6667	0	0	0	0	3	2	2					0.477121
8	9	19	Mon	GL2	bar0	9	8		8,5,8,10,7,3,4,5,8,10,7,9,6	3	12	11	3.66667	8	0,1,1,1,0,0,0,1,1,1,1	63.6364	0	0	0	1	3	2	2					0.564271
8	9	20	Mon	GL2	bar0	9	1		1,2,1,6,9,12	2	5	4	2	2	0,1,1,1	75	0	1	0	1	3	2	2					0.30103
5	10	1	Wed	GL2	bar0	13	2		2,1,6,9,12,15,13	4	7	6	1.5	2	0,1,1,1,1,1	83.3333	0	1	1	0	3	2	3					0.176091
5	10	2	Wed	GL2	bar0	13	20		20,19,12,9,7,10,13	4	7	6	1.5	2	1,1,0,1,1,1	83.3333	0	0	1	0	3	2	3					0.176091
5	10	3	Wed	GL2	bar0	13	1		1,2,3,7,10,13	5	6	5	1	0	1,1,1,1,1	100	1	1	1	0	3	2	3					0
5	10	4	Wed	GL2	bar0	13	11		11,14,16,13	3	4	3	1	0	1,1,1	100	1	1	1	0	3	2	3					0
5	10	5	Wed	GL2	bar0	13	21		21,20,19,18,17,6,1,2,3,4,5,8,11,14,16,13	3	16	15	5	12	0,1,0,0,1,0,1,1,0,1,1,0,1,1,1	60	0	0	1	0	3	2	3					0.69897
5	10	6	Wed	GL2	bar0	13	8	circle	8,11,14,16,24,23,22,21,20,19,18,17,6,1,2,3,4,5,8,11,14,16,13	2	23	22	11	20	0,1,1,0,0,1,0,0,1,0,0,1,0,1,1,0,1,1,0,1,1,1	54.5455	0	0	1	0	3	2	3					1.04139
5	10	7	Wed	GL2	bar0	13	12		12,9,7,3,2,3,7,10,13	2	9	8	4	6	0,1,0,0,1,1,1,1	62.5	0	0	1	0	3	2	3					0.60206
5	10	8	Wed	GL2	bar0	13	23		23,22,15,13	3	4	3	1	0	1,1,1	100	1	1	1	0	3	2	3					0
5	10	9	Wed	GL2	bar0	13	18		18,17,6,9,7,3,2,1,6,17,18,19,20,21,22,23,24,16,13	4	19	18	4.5	14	0,1,1,1,0,0,0,1,0,1,1,0,1,1,0,1,1,1	61.1111	0	0	1	0	3	2	3					0.653213
5	10	10	Wed	GL2	bar0	13	14		14,16,24,23,22,15,13	2	7	6	3	4	1,0,0,1,1,1	66.6667	0	0	1	0	3	2	3					0.477121
5	10	11	Wed	GL2	bar0	13	6		6,1,2,3,4,5,8,11,14,16,24,23,22,21,20,19,12,9,7,3,7,10,13	4	23	22	5.5	18	0,1,1,0,1,1,0,1,1,0,0,1,0,0,1,1,0,1,0,1,1,1	59.0909	0	0	1	0	3	2	3					0.740363
5	10	12	Wed	GL2	bar0	13	19		19,18,17,6,9,12,15,22,21,20,19,18,17,6,9,7,10,8,11,14,16,24,23,22,15,13	3	26	25	8.33333	22	0,0,1,1,1,1,0,0,0,1,0,0,1,1,1,1,0,0,1,1,0,0,1,1,1	56	0	0	1	0	3	2	3					0.920819
5	10	13	Wed	GL2	bar0	13	7		7,10,13,15	2	3	2	1	0	1,1	100	1	1	0	0	3	2	3					0
5	10	14	Wed	GL2	bar0	13	14		14,16,13,10	2	3	2	1	0	1,1	100	1	1	0	0	3	2	3					0
5	10	15	Wed	GL2	bar0	13	3		3,4,5,8,10,13	3	6	5	1.66667	2	0,1,1,1,1	80	0	1	1	0	3	2	3					0.221849
5	10	16	Wed	GL2	bar0	13	23		23,22,15,13,10	3	4	3	1	0	1,1,1	100	1	1	0	0	3	2	3					0
5	10	17	Wed	GL2	bar0	13	19		19,20,21,22,15,13	3	6	5	1.66667	2	0,1,1,1,1	80	0	1	1	0	3	2	3					0.221849
5	10	18	Wed	GL2	bar0	13	8		8,5,4,3,2,1,2,1,6,17,18,19,12,15,13	2	15	14	7	12	0,0,1,0,0,1,0,1,0,1,1,1,1,1	57.1429	0	0	1	0	3	2	3					0.845098
5	10	19	Wed	GL2	bar0	13	18		18,17,6,9,7,10,13	4	7	6	1.5	2	0,1,1,1,1,1	83.3333	0	1	1	0	3	2	3					0.176091
5	10	20	Wed	GL2	bar0	13	7		7,10,13,15	2	3	2	1	0	1,1	100	1	1	0	0	3	2	3					0
5	10	21	Wed	GL2	bar0	13	23		23,22,15,13,10	3	4	3	1	0	1,1,1	100	1	1	0	0	3	2	3					0
5	10	22	Wed	GL2	bar0	13	5		5,8,11,14,16,13,15	3	6	5	1.66667	2	1,0,1,1,1	80	0	1	0	0	3	2	3					0.221849
5	10	23	Wed	GL2	bar0	13	1		1,6,17,18,19,20,21,22,23,24,16,14,16,13,10	5	14	13	2.6	8	1,0,1,1,0,1,1,0,1,1,0,1,1	69.2308	0	0	0	0	3	2	3					0.414973
5	10	24	Wed	GL2	bar0	13	12		12,19,18,17,18,19,12,15,13,16	2	9	8	4	6	0,0,0,1,1,1,1,1	62.5	0	0	0	0	3	2	3					0.60206
5	10	25	Wed	GL2	bar0	13	3		3,2,1,6,9,7,10,13	3	8	7	2.33333	4	0,0,1,1,1,1,1	71.4286	0	1	1	0	3	2	3					0.367977
6	10	1	Wed	GL2	bar0	20	17	could?ve been just circling.	17,18,19,20,21	3	4	3	1	0	1,1,1	100	1	1	0	0	3	2	3					0
6	10	2	Wed	GL2	bar0	20	4		4,3,2,1,6,17,18,19,20	6	9	8	1.33333	2	1,0,1,1,1,1,1,1	87.5	0	1	1	0	3	2	3					0.124939
6	10	3	Wed	GL2	bar0	20	13		13,16,24,23,22,21,20	4	7	6	1.5	2	0,1,1,1,1,1	83.3333	0	1	1	0	3	2	3					0.176091
6	10	4	Wed	GL2	bar0	20	23		23,22,15,12,19,20	3	6	5	1.66667	2	1,0,1,1,1	80	0	1	1	0	3	2	3					0.221849
6	10	5	Wed	GL2	bar0	20	3		3,4,5,8,10,13,16,14,11,8,10,13,16,24,23,22,21,20	5	18	17	3.4	12	0,0,1,1,1,0,0,0,1,1,1,0,1,1,1,1,1	64.7059	0	0	1	0	3	2	3					0.531479
6	10	6	Wed	GL2	bar0	20	14		14,16,24,23,22,21,20	6	7	6	1	0	1,1,1,1,1,1	100	1	1	1	0	3	2	3					0
6	10	7	Wed	GL2	bar0	20	9		9,7,3,4,3,2,1,6,17,18,19,20	3	12	11	3.66667	8	0,0,0,1,0,1,1,1,1,1,1	63.6364	0	0	1	0	3	2	3					0.564271
6	10	8	Wed	GL2	bar0	20	4		4,5,8,11,14,16,24,23,22,21,20	6	11	10	1.66667	4	0,1,0,1,1,1,1,1,1,1	80	0	0	1	0	3	2	3					0.221849
6	10	9	Wed	GL2	bar0	20	15		15,12,19,20	3	4	3	1	0	1,1,1	100	1	1	1	0	3	2	3					0
6	10	10	Wed	GL2	bar0	20	7		7,3,2,1,6,9,7,3,4,5,4,3,2,1,6,9,12,15,22,23,24,16,14,11,8,5,4,3,2,3,7,10,13,15,22,21,20	4	37	36	9	32	0,0,1,1,1,0,0,0,0,1,1,0,1,1,1,1,0,1,0,0,0,0,0,1,0,1,1,0,1,1,0,1,1,1,1,1	55.5556	0	0	1	0	3	2	3					0.954243
6	10	11	Wed	GL2	bar0	20	23		23,24,16,13,10,8,5,8,11,14,16,24,23,22,21,20	3	16	15	5	12	0,0,1,0,0,0,1,0,1,1,1,1,1,1,1	60	0	0	1	0	3	2	3					0.69897
6	10	12	Wed	GL2	bar0	20	5		5,8,10,7,9,6,17,18,19,20,21	7	10	9	1.28571	2	1,1,1,1,0,1,1,1,1	88.8889	0	0	0	0	3	2	3					0.109144
6	10	13	Wed	GL2	bar0	20	18		18,17,6,1,2,3,4,5,8,10,13,16,24,23,22,21,20	2	17	16	8	14	0,0,0,0,1,0,0,1,1,1,0,1,1,1,1,1	56.25	0	0	1	0	3	2	3					0.90309
6	10	14	Wed	GL2	bar0	20	3		3,4,5,8,11,14,16,13,15,12,19,18,17,6,1,2,1,6,17,18,19,20,21	5	22	21	4.2	16	0,0,1,0,1,1,1,1,1,1,0,0,0,0,0,1,1,1,1,1,1	61.9048	0	0	0	0	3	2	3					0.623249
6	10	15	Wed	GL2	bar0	20	14		14,16,13,10,8,5,4,3,7,9,12,19,20,21	6	13	12	2	6	1,1,0,0,0,1,1,1,1,1,1,1	75	0	0	0	0	3	2	3					0.30103
6	10	16	Wed	GL2	bar0	20	17		17,6,9,12,15,13,16,24,23,22,21,20	3	12	11	3.66667	8	0,1,1,0,0,0,1,1,1,1,1	63.6364	0	0	1	0	3	2	3					0.564271
6	10	17	Wed	GL2	bar0	20	22		22,23,24,16,14,11,8,10,7,9,6,1,6,17,18,19,20,21	2	17	16	8	14	0,0,0,0,0,1,1,1,1,0,0,1,1,1,1,1	56.25	0	0	0	0	3	2	3					0.90309
6	10	18	Wed	GL2	bar0	20	16		16,14,11,8,10,13,15,22,21,22,23,24,16,14,16,24,23,22,21,20	5	20	19	3.8	14	0,0,1,1,1,1,1,1,0,0,0,0,0,1,1,1,1,1,1	63.1579	0	0	1	0	3	2	3					0.579784
6	10	19	Wed	GL2	bar0	20	12		12,15,13,10,8,11,14,11,8,10,7,9,6,17,18,19,20	2	17	16	8	14	0,0,0,0,0,1,0,1,1,1,1,0,1,1,1,1	56.25	0	0	1	0	3	2	3					0.90309
6	10	20	Wed	GL2	bar0	20	7		7,10,13,15,12,19,20,21	4	7	6	1.5	2	0,1,1,1,1,1	83.3333	0	1	0	0	3	2	3					0.176091
6	10	21	Wed	GL2	bar0	20	11		11,14,16,24,23,22,21,20	7	8	7	1	0	1,1,1,1,1,1,1	100	1	1	1	0	3	2	3					0
6	10	22	Wed	GL2	bar0	20	9		9,6,17,18,19,20,21	3	6	5	1.66667	2	0,1,1,1,1	80	0	1	0	0	3	2	3					0.221849
6	10	23	Wed	GL2	bar0	20	4		4,5,8,10,7,9,6,17,18,19,20	6	11	10	1.66667	4	0,1,1,1,1,0,1,1,1,1	80	0	0	1	0	3	2	3					0.221849
6	10	24	Wed	GL2	bar0	20	1		1,2,3,7,9,12,19,20,21	5	8	7	1.4	2	0,1,1,1,1,1,1	85.7143	0	1	0	0	3	2	3					0.146128
6	10	25	Wed	GL2	bar0	20	23		23,22,21,20,19	3	4	3	1	0	1,1,1	100	1	1	0	0	3	2	3					0
6	10	26	Wed	GL2	bar0	20	9		9,6,17,18,19,20	3	6	5	1.66667	2	0,1,1,1,1	80	0	1	1	0	3	2	3					0.221849
7	10	1	Wed	GL2	bar0	5	14		14,16,24,23,22,15,13,10,8,5	3	10	9	3	6	0,0,0,1,1,1,1,1,1	66.6667	0	0	1	0	3	2	3					0.477121
7	10	2	Wed	GL2	bar0	5	1		1,2,3,4,5,8	4	5	4	1	0	1,1,1,1	100	1	1	0	0	3	2	3					0
7	10	3	Wed	GL2	bar0	5	12		12,19,18,17,6,1,2,3,4,5	5	10	9	1.8	4	0,0,1,1,1,1,1,1,1	77.7778	0	1	1	0	3	2	3					0.255273
7	10	4	Wed	GL2	bar0	5	3		3,7,10,8,5	2	5	4	2	2	0,1,1,1	75	0	1	1	0	3	2	3					0.30103
7	10	5	Wed	GL2	bar0	5	15		15,22,23,24,16,14,11,8,5	4	9	8	2	4	0,0,1,1,1,1,1,1	75	0	1	1	0	3	2	3					0.30103
7	10	6	Wed	GL2	bar0	5	18		18,17,6,9,7,3,4,5,8	7	8	7	1	0	1,1,1,1,1,1,1	100	1	1	0	0	3	2	3					0
7	10	7	Wed	GL2	bar0	5	11		11,14,16,24,23,22,15,12,19,20,19,18,17,6,1,2,3,4,5,8	2	19	18	9	16	0,0,0,0,1,1,0,0,0,1,0,1,1,1,1,1,1,1	55.5556	0	0	0	0	3	2	3					0.954243
7	10	8	Wed	GL2	bar0	5	21		21,20,19,18,17,6,1,2,3,4,5	6	11	10	1.66667	4	0,1,0,1,1,1,1,1,1,1	80	0	0	1	0	3	2	3					0.221849
7	10	9	Wed	GL2	bar0	5	7		7,9,12,19,18,17,6,9,12,15,13,10,8,5,4	3	14	13	4.33333	10	0,0,0,0,1,1,1,0,1,1,1,1,1	61.5385	0	0	0	0	3	2	3					0.636822
7	10	10	Wed	GL2	bar0	5	22	extremely long trial	22,21,22,15,13,10,8,5,4	5	8	7	1.4	2	0,1,1,1,1,1,1	85.7143	0	1	0	1	3	2	3					0.146128
7	10	11	Wed	GL2	bar0	5	1		1,2,3,4,5	4	5	4	1	0	1,1,1,1	100	1	1	1	0	3	2	3					0
7	10	12	Wed	GL2	bar0	5	12		12,19,18,19,20,21,22,15,13,10,8,5	5	12	11	2.2	6	0,0,1,0,1,1,1,1,1,1,1	72.7273	0	0	1	1	3	2	3					0.342423
7	10	13	Wed	GL2	bar0	5	14		14,11,8,5,4	3	4	3	1	0	1,1,1	100	1	1	0	0	3	2	3					0
7	10	14	Wed	GL2	bar0	5	21		21,20,21,22,15,13,10,8,5	6	9	8	1.33333	2	0,1,1,1,1,1,1,1	87.5	0	1	1	1	3	2	3					0.124939
7	10	15	Wed	GL2	bar0	5	6		6,9,7,10,8,5	5	6	5	1	0	1,1,1,1,1	100	1	1	1	0	3	2	3					0
7	10	16	Wed	GL2	bar0	5	22		22,15,13,10,8,5,8	5	6	5	1	0	1,1,1,1,1	100	1	1	0	0	3	2	3					0
8	10	1	Wed	GL2	bar0	9	23		23,24,16,13,15,12,19,20,21,22,23,24,16,14,11,8,10,7,9	4	19	18	4.5	14	0,1,1,1,1,0,0,0,1,0,0,1,0,1,1,1,1,1	61.1111	0	0	1	0	3	2	3					0.653213
8	10	2	Wed	GL2	bar0	9	20		20,21,22,23,24,16,13,10,7,3,2,1,6,17,18,19,12,15,13,16,14,11,8,10,7,9	3	26	25	8.33333	22	0,1,0,0,1,1,1,1,0,0,1,1,0,0,1,1,0,0,0,0,1,1,1,1,1	56	0	0	1	0	3	2	3					0.920819
8	10	3	Wed	GL2	bar0	9	11		11,8,10,13,15,22,21,20,19,18,17,6,9	4	13	12	3	8	1,1,0,1,0,0,1,1,0,1,1,1	66.6667	0	0	1	0	3	2	3					0.477121
8	10	4	Wed	GL2	bar0	9	19	IB at 3:30, rapid change of mind at a node.	19,20,21,22,15,13,10,7,9	2	9	8	4	6	0,0,1,1,0,1,1,1	62.5	0	0	1	0	3	2	3					0.60206
8	10	5	Wed	GL2	bar0	9	24		24,23,22,21,20,19,18,17,6,1,2,3,4,5,8,11,14,16,24,23,22,21,20,19,18,17,6,9	5	28	27	5.4	22	1,1,0,1,1,0,1,1,0,0,1,0,0,1,0,0,1,0,1,1,0,1,1,0,1,1,1	59.2593	0	0	1	0	3	2	3					0.732394
8	10	6	Wed	GL2	bar0	9	17		17,18,19,12,9	2	5	4	2	2	0,1,1,1	75	0	1	1	0	3	2	3					0.30103
8	10	7	Wed	GL2	bar0	9	3		3,2,1,6,17,18,19,12,9	2	9	8	4	6	0,1,1,0,0,1,1,1	62.5	0	0	1	0	3	2	3					0.60206
8	10	8	Wed	GL2	bar0	9	13		13,16,14,11,14,16,24,23,22,21,20,19,18,17,6,1,2,3,4,5,8,11,14,16,13,15,22,23,22,21,20,19,18,17,6,9	3	36	35	11.6667	32	0,0,1,0,1,0,1,1,0,1,1,0,1,1,0,0,1,0,0,1,0,0,1,1,1,0,0,1,0,1,1,0,1,1,1	54.2857	0	0	1	0	3	2	3					1.06695
8	10	9	Wed	GL2	bar0	9	20		20,21,22,23,24,23,24,16,13,10,7,9	3	12	11	3.66667	8	0,1,0,0,1,0,1,1,1,1,1	63.6364	0	0	1	0	3	2	3					0.564271
8	10	10	Wed	GL2	bar0	9	10		10,8,5,4,3,2,1,6,9	2	9	8	4	6	0,0,1,1,0,1,1,1	62.5	0	0	1	0	3	2	3					0.60206
8	10	11	Wed	GL2	bar0	9	1		1,2,3,7,10,13,16,24,23,22,15,12,9,6	2	13	12	6	10	0,1,1,0,0,0,0,1,1,1,1,1	58.3333	0	0	0	0	3	2	3					0.778151
8	10	12	Wed	GL2	bar0	9	14		14,11,8,10,7,9	5	6	5	1	0	1,1,1,1,1	100	1	1	1	0	3	2	3					0
8	10	13	Wed	GL2	bar0	9	2		2,1,6,17,18,19,20,19,12,9	3	10	9	3	6	1,1,0,0,1,0,1,1,1	66.6667	0	0	1	0	3	2	3					0.477121
8	10	14	Wed	GL2	bar0	9	14		14,16,24,23,22,21,20,19,18,17,6,9,7	5	12	11	2.2	6	1,0,1,1,0,1,1,0,1,1,1	72.7273	0	0	0	0	3	2	3					0.342423
8	10	15	Wed	GL2	bar0	9	4		4,3,7,9,6	3	4	3	1	0	1,1,1	100	1	1	0	0	3	2	3					0
8	10	16	Wed	GL2	bar0	9	14		14,16,24,23,22,15,12,9	5	8	7	1.4	2	1,0,1,1,1,1,1	85.7143	0	1	1	0	3	2	3					0.146128
8	10	17	Wed	GL2	bar0	9	10		10,8,5,4,3,7,9,12	2	7	6	3	4	0,0,1,1,1,1	66.6667	0	1	0	0	3	2	3					0.477121
8	10	18	Wed	GL2	bar0	9	1		1,6,9,12	2	3	2	1	0	1,1	100	1	1	0	0	3	2	3					0
8	10	19	Wed	GL2	bar0	9	4		4,5,8,10,7,9,6	3	6	5	1.66667	2	0,1,1,1,1	80	0	1	0	0	3	2	3					0.221849
8	10	20	Wed	GL2	bar0	9	16		16,24,23,22,15,12,19,18,17,6,9	4	11	10	2.5	6	0,1,1,1,1,0,0,1,1,1	70	0	0	1	0	3	2	3					0.39794
8	10	21	Wed	GL2	bar0	9	20		20,19,12,9,7	3	4	3	1	0	1,1,1	100	1	1	0	0	3	2	3					0
5	11	1	Fri	GL2	bar0	13	21		21,20,19,12,15,13	3	6	5	1.66667	2	0,1,1,1,1	80	0	1	1	0	3	2	4					0.221849
5	11	2	Fri	GL2	bar0	13	14		14,16,13	2	3	2	1	0	1,1	100	1	1	1	0	3	2	4					0
5	11	3	Fri	GL2	bar0	13	18		18,17,6,9,12,15,13	4	7	6	1.5	2	0,1,1,1,1,1	83.3333	0	1	1	0	3	2	4					0.176091
5	11	4	Fri	GL2	bar0	13	11		11,14,16,13	3	4	3	1	0	1,1,1	100	1	1	1	0	3	2	4					0
5	11	5	Fri	GL2	bar0	13	12		12,9,6,1,2,3,7,10,13	2	9	8	4	6	0,0,0,1,1,1,1,1	62.5	0	0	1	0	3	2	4					0.60206
5	11	6	Fri	GL2	bar0	13	8		8,5,4,3,2,1,6,17,18,19,20,21,22,23,24,16,13	2	17	16	8	14	0,0,1,0,0,1,0,1,1,0,1,1,0,1,1,1	56.25	0	0	1	0	3	2	4					0.90309
5	11	7	Fri	GL2	bar0	13	22		22,21,20,19,18,17,6,9,7,10,13	2	11	10	5	8	0,0,1,0,0,1,1,1,1,1	60	0	0	1	0	3	2	4					0.69897
5	11	8	Fri	GL2	bar0	13	7		7,9,12,15,13	2	5	4	2	2	0,1,1,1	75	0	1	1	0	3	2	4					0.30103
5	11	9	Fri	GL2	bar0	13	23		23,22,21,20,19,20,21,22,15,13	3	10	9	3	6	1,0,0,1,0,1,1,1,1	66.6667	0	0	1	0	3	2	4					0.477121
5	11	10	Fri	GL2	bar0	13	2		2,3,4,5,8,11,14,11,8,10,13,15	4	11	10	2.5	6	1,0,1,1,0,1,0,1,1,1	70	0	0	0	0	3	2	4					0.39794
5	11	11	Fri	GL2	bar0	13	5		5,8,10,13,15	3	4	3	1	0	1,1,1	100	1	1	0	0	3	2	4					0
5	11	12	Fri	GL2	bar0	13	6		6,1,2,3,4,5,8,10,13	4	9	8	2	4	0,1,1,0,1,1,1,1	75	0	0	1	0	3	2	4					0.30103
5	11	13	Fri	GL2	bar0	13	14		14,16,13	2	3	2	1	0	1,1	100	1	1	1	0	3	2	4					0
5	11	14	Fri	GL2	bar0	13	9		9,7,3,4,5,8,10,13	3	8	7	2.33333	4	1,0,0,1,1,1,1	71.4286	0	0	1	0	3	2	4					0.367977
5	11	15	Fri	GL2	bar0	13	21		21,20,19,18,17,6,9,7,10,13	3	10	9	3	6	0,1,0,0,1,1,1,1,1	66.6667	0	0	1	0	3	2	4					0.477121
5	11	16	Fri	GL2	bar0	13	2		2,3,7,10,13	4	5	4	1	0	1,1,1,1	100	1	1	1	0	3	2	4					0
5	11	17	Fri	GL2	bar0	13	5		5,8,10,13	3	4	3	1	0	1,1,1	100	1	1	1	0	3	2	4					0
5	11	18	Fri	GL2	bar0	13	23		23,22,21,20,19,18,17,6,1,2,3,4,5,8,11,14,16,13	3	18	17	5.66667	14	1,0,0,1,0,0,1,0,1,1,0,1,1,0,1,1,1	58.8235	0	0	1	0	3	2	4					0.753328
5	11	19	Fri	GL2	bar0	13	18		18,17,6,9,7,10,13,15	4	7	6	1.5	2	0,1,1,1,1,1	83.3333	0	1	0	0	3	2	4					0.176091
5	11	20	Fri	GL2	bar0	13	14		14,16,24,23,22,15,13	2	7	6	3	4	1,0,0,1,1,1	66.6667	0	0	1	0	3	2	4					0.477121
5	11	21	Fri	GL2	bar0	13	17		17,18,19,20,21,22,23,24,16,13,10	5	10	9	1.8	4	1,1,0,1,1,0,1,1,1	77.7778	0	0	0	0	3	2	4					0.255273
5	11	22	Fri	GL2	bar0	13	7		7,3,4,3,7,10,13	2	7	6	3	4	0,0,1,1,1,1	66.6667	0	1	1	1	3	2	4					0.477121
5	11	23	Fri	GL2	bar0	13	22		22,21,20,19,18,17,6,9,7,10,8,11,14,16,13,15	2	15	14	7	12	0,0,1,0,0,1,1,1,1,0,0,1,1,1	57.1429	0	0	0	0	3	2	4					0.845098
5	11	24	Fri	GL2	bar0	13	4		4,5,8,10,13	4	5	4	1	0	1,1,1,1	100	1	1	1	0	3	2	4					0
5	11	25	Fri	GL2	bar0	13	21		21,20,21,22,15,13,16	3	6	5	1.66667	2	0,1,1,1,1	80	0	1	0	1	3	2	4					0.221849
5	11	26	Fri	GL2	bar0	13	7		7,9,12,15,22,23,24,16,13,16	2	9	8	4	6	0,1,1,0,0,1,1,1	62.5	0	0	0	0	3	2	4					0.60206
5	11	27	Fri	GL2	bar0	13	14		14,16,13	2	3	2	1	0	1,1	100	1	1	1	0	3	2	4					0
6	11	1	Fri	GL2	bar0	20	4		4,5,8,10,13,15,22,21,20	6	9	8	1.33333	2	0,1,1,1,1,1,1,1	87.5	0	1	1	0	3	2	4					0.124939
6	11	2	Fri	GL2	bar0	20	23		23,22,15,12,9,7,10,8,11,14,16,24,23,22,21,20	3	16	15	5	12	1,0,1,0,0,0,0,0,1,1,1,1,1,1,1	60	0	0	1	0	3	2	4					0.69897
6	11	3	Fri	GL2	bar0	20	2		2,3,7,9,12,19,20	6	7	6	1	0	1,1,1,1,1,1	100	1	1	1	0	3	2	4					0
6	11	4	Fri	GL2	bar0	20	12		12,9,7,10,13,16,24,23,22,21,20	2	11	10	5	8	0,0,0,1,0,1,1,1,1,1	60	0	0	1	0	3	2	4					0.69897
6	11	5	Fri	GL2	bar0	20	3		3,4,5,8,10,13,15,22,21,20	5	10	9	1.8	4	0,0,1,1,1,1,1,1,1	77.7778	0	1	1	0	3	2	4					0.255273
6	11	6	Fri	GL2	bar0	20	14		14,11,8,5,4,3,2,1,6,17,18,19,20,21	6	13	12	2	6	0,1,0,1,1,0,1,1,1,1,1,1	75	0	0	0	0	3	2	4					0.30103
6	11	7	Fri	GL2	bar0	20	18		18,17,6,9,12,19,20,21	2	7	6	3	4	0,0,1,1,1,1	66.6667	0	1	0	0	3	2	4					0.477121
6	11	8	Fri	GL2	bar0	20	3		3,4,5,8,11,14,16,24,23,22,21,20	5	12	11	2.2	6	0,0,1,0,1,1,1,1,1,1,1	72.7273	0	0	1	0	3	2	4					0.342423
6	11	9	Fri	GL2	bar0	20	11		11,8,5,4,3,2,1,6,17,18,19,20	7	12	11	1.57143	4	1,0,1,1,0,1,1,1,1,1,1	81.8182	0	0	1	0	3	2	4					0.196295
6	11	10	Fri	GL2	bar0	20	9		9,7,10,13,16,24,23,22,21,20	3	10	9	3	6	0,0,1,0,1,1,1,1,1	66.6667	0	0	1	0	3	2	4					0.477121
6	11	11	Fri	GL2	bar0	20	4		4,5,8,11,14,16,13,10,7,3,2,1,6,17,18,19,20	6	17	16	2.66667	10	0,1,0,1,1,1,0,1,0,0,1,1,1,1,1,1	68.75	0	0	1	0	3	2	4					0.425969
6	11	12	Fri	GL2	bar0	20	15		15,13,10,7,3,2,1,6,17,18,19,20,21	3	12	11	3.66667	8	0,0,1,0,0,1,1,1,1,1,1	63.6364	0	0	0	0	3	2	4					0.564271
6	11	13	Fri	GL2	bar0	20	17		17,6,1,2,3,7,9,12,19,20	3	10	9	3	6	0,0,0,1,1,1,1,1,1	66.6667	0	0	1	0	3	2	4					0.477121
6	11	14	Fri	GL2	bar0	20	7		7,10,13,15,22,21,20,21	4	7	6	1.5	2	0,1,1,1,1,1	83.3333	0	1	0	0	3	2	4					0.176091
6	11	15	Fri	GL2	bar0	20	23		23,22,15,12,19,18,17,6,1,2,3,4,5,8,11,14,16,24,23,22,21,20	3	22	21	7	18	1,0,1,1,0,0,0,0,0,1,0,0,1,0,1,1,1,1,1,1,1	57.1429	0	0	1	0	3	2	4					0.845098
6	11	16	Fri	GL2	bar0	20	10		10,8,5,4,3,2,1,6,17,18,19,20,21	5	12	11	2.2	6	0,0,1,1,0,1,1,1,1,1,1	72.7273	0	0	0	0	3	2	4					0.342423
6	11	17	Fri	GL2	bar0	20	17		17,6,9,12,19,20,21	3	6	5	1.66667	2	0,1,1,1,1	80	0	1	0	0	3	2	4					0.221849
6	11	18	Fri	GL2	bar0	20	4		4,3,2,1,6,17,18,19,20	6	9	8	1.33333	2	1,0,1,1,1,1,1,1	87.5	0	1	1	0	3	2	4					0.124939
6	11	19	Fri	GL2	bar0	20	1		1,6,17,18,19,20,21	5	6	5	1	0	1,1,1,1,1	100	1	1	0	0	3	2	4					0
6	11	20	Fri	GL2	bar0	20	12		12,15,22,21,20	2	5	4	2	2	0,1,1,1	75	0	1	1	0	3	2	4					0.30103
6	11	21	Fri	GL2	bar0	20	3		3,4,5,8,11,14,16,24,23,22,15,12,19,20	5	14	13	2.6	8	0,0,1,0,1,1,1,1,1,0,1,1,1	69.2308	0	0	1	0	3	2	4					0.414973
6	11	22	Fri	GL2	bar0	20	13		13,10,8,11,14,16,13,15,13,16,24,23,22,21,20	4	15	14	3.5	10	0,0,0,1,1,1,1,0,0,1,1,1,1,1	64.2857	0	0	1	0	3	2	4					0.544068
6	11	23	Fri	GL2	bar0	20	17		17,6,1,2,3,4,3,2,1,6,17,18,19,20,21	3	14	13	4.33333	10	0,0,0,1,0,1,0,1,1,1,1,1,1	61.5385	0	0	0	0	3	2	4					0.636822
6	11	24	Fri	GL2	bar0	20	22		22,23,22,21,20	2	5	4	2	2	0,1,1,1	75	0	1	1	1	3	2	4					0.30103
6	11	25	Fri	GL2	bar0	20	5		5,4,3,7,9,12,19,20,21	7	8	7	1	0	1,1,1,1,1,1,1	100	1	1	0	0	3	2	4					0
7	11	1	Fri	GL2	bar0	5	2		2,3,7,9,12,15,22,21,20,19,18,17,6,9,12,19,12,9,7,3,4,5	3	22	21	7	18	1,0,0,0,1,0,0,0,1,0,1,1,1,0,0,1,1,1,1,1,1	57.1429	0	0	1	0	3	2	4					0.845098
7	11	2	Fri	GL2	bar0	5	24		24,23,22,15,12,9,7,3,4,5	5	10	9	1.8	4	0,1,1,0,1,1,1,1,1	77.7778	0	0	1	0	3	2	4					0.255273
7	11	3	Fri	GL2	bar0	5	3		3,7,10,13,16,14,11,8,5	2	9	8	4	6	0,1,0,0,1,1,1,1	62.5	0	0	1	0	3	2	4					0.60206
7	11	4	Fri	GL2	bar0	5	14		14,16,13,15,12,19,18,17,6,1,2,3,4,5	3	14	13	4.33333	10	0,1,0,0,0,0,1,1,1,1,1,1,1	61.5385	0	0	1	0	3	2	4					0.636822
7	11	5	Fri	GL2	bar0	5	18		18,17,6,1,2,3,4,5	7	8	7	1	0	1,1,1,1,1,1,1	100	1	1	1	0	3	2	4					0
7	11	6	Fri	GL2	bar0	5	10		10,8,5	2	3	2	1	0	1,1	100	1	1	1	0	3	2	4					0
7	11	7	Fri	GL2	bar0	5	21		21,20,19,18,17,6,1,2,3,4,5	6	11	10	1.66667	4	0,1,0,1,1,1,1,1,1,1	80	0	0	1	0	3	2	4					0.221849
7	11	8	Fri	GL2	bar0	5	6		6,17,18,19,20,21,22,23,24,16,14,11,8,5	5	14	13	2.6	8	0,0,1,0,1,1,0,1,1,1,1,1,1	69.2308	0	0	1	0	3	2	4					0.414973
7	11	9	Fri	GL2	bar0	5	15		15,12,19,18,17,6,1,2,3,4,5	4	11	10	2.5	6	0,0,0,1,1,1,1,1,1,1	70	0	0	1	0	3	2	4					0.39794
7	11	10	Fri	GL2	bar0	5	11		11,8,5,4	2	3	2	1	0	1,1	100	1	1	0	0	3	2	4					0
7	11	11	Fri	GL2	bar0	5	23		23,22,21,20,19,12,9,7,3,4,5	6	11	10	1.66667	4	1,0,0,1,1,1,1,1,1,1	80	0	0	1	0	3	2	4					0.221849
7	11	12	Fri	GL2	bar0	5	3		3,2,1,6,9,12,15,22,23,24,16,14,11,8,5	2	15	14	7	12	0,0,0,1,0,1,0,0,1,1,1,1,1,1	57.1429	0	0	1	0	3	2	4					0.845098
7	11	13	Fri	GL2	bar0	5	13		13,15,12,19,18,17,6,1,2,3,4,5	3	12	11	3.66667	8	0,0,0,0,1,1,1,1,1,1,1	63.6364	0	0	1	0	3	2	4					0.564271
7	11	14	Fri	GL2	bar0	5	19		19,20,21,22,15,13,10,8,5	6	9	8	1.33333	2	0,1,1,1,1,1,1,1	87.5	0	1	1	0	3	2	4					0.124939
7	11	15	Fri	GL2	bar0	5	11		11,8,5,4	2	3	2	1	0	1,1	100	1	1	0	0	3	2	4					0
7	11	16	Fri	GL2	bar0	5	1		1,2,3,4,5,8	4	5	4	1	0	1,1,1,1	100	1	1	0	0	3	2	4					0
7	11	17	Fri	GL2	bar0	5	24		24,16,14,11,8,5,8	5	6	5	1	0	1,1,1,1,1	100	1	1	0	0	3	2	4					0
7	11	18	Fri	GL2	bar0	5	3		3,2,1,6,9,12,19,20,21,22,21,20,19,12,9,7,3,4,5	2	19	18	9	16	0,0,0,1,0,0,0,1,1,0,0,1,1,1,1,1,1,1	55.5556	0	0	1	0	3	2	4					0.954243
7	11	19	Fri	GL2	bar0	5	14		14,11,8,5,4	3	4	3	1	0	1,1,1	100	1	1	0	0	3	2	4					0
7	11	20	Fri	GL2	bar0	5	18		18,19,20,21,22,15,13,10,8,5	7	10	9	1.28571	2	1,0,1,1,1,1,1,1,1	88.8889	0	1	1	0	3	2	4					0.109144
7	11	21	Fri	GL2	bar0	5	22		22,15,12,19,18,17,6,1,2,3,4,5	5	12	11	2.2	6	1,0,0,0,1,1,1,1,1,1,1	72.7273	0	0	1	0	3	2	4					0.342423
7	11	22	Fri	GL2	bar0	5	10		10,7,3,2,3,4,5	2	7	6	3	4	0,1,0,1,1,1	66.6667	0	0	1	0	3	2	4					0.477121
7	11	23	Fri	GL2	bar0	5	6		6,17,18,19,12,9,7,3,4,5	5	10	9	1.8	4	0,0,1,1,1,1,1,1,1	77.7778	0	1	1	0	3	2	4					0.255273
7	11	24	Fri	GL2	bar0	5	15		15,22,15,13,10,8,5	4	7	6	1.5	2	0,1,1,1,1,1	83.3333	0	1	1	1	3	2	4					0.176091
7	11	25	Fri	GL2	bar0	5	11		11,14,16,13,10,7,9,6,17,6,9,7,10,8,5	2	15	14	7	12	0,0,1,1,0,0,0,0,1,1,1,1,1,1	57.1429	0	0	1	0	3	2	4					0.845098
7	11	26	Fri	GL2	bar0	5	1		1,6,17,18,19,20,19,18,17,6,1,2,3,4,5	4	15	14	3.5	10	0,0,0,1,0,1,0,1,1,1,1,1,1,1	64.2857	0	0	1	0	3	2	4					0.544068
7	11	27	Fri	GL2	bar0	5	12		12,19,20,19,12,9,7,10,8,5	5	10	9	1.8	4	0,0,1,1,1,1,1,1,1	77.7778	0	1	1	1	3	2	4					0.255273
8	11	1	Fri	GL2	bar0	9	8		8,5,4,3,7,9	3	6	5	1.66667	2	0,1,1,1,1	80	0	1	1	0	3	2	4					0.221849
8	11	2	Fri	GL2	bar0	9	24		24,16,13,15,22,23,24,16,13,10,7,9	5	12	11	2.2	6	1,1,1,0,0,0,1,1,1,1,1	72.7273	0	0	1	0	3	2	4					0.342423
8	11	3	Fri	GL2	bar0	9	17		17,18,19,20,21,22,15,12,9	2	9	8	4	6	0,1,0,0,1,1,1,1	62.5	0	0	1	0	3	2	4					0.60206
8	11	4	Fri	GL2	bar0	9	10		10,8,5,4,3,7,9	2	7	6	3	4	0,0,1,1,1,1	66.6667	0	1	1	0	3	2	4					0.477121
8	11	5	Fri	GL2	bar0	9	21		21,22,15,12,19,20,21,22,23,24,16,13,15,12,9	4	15	14	3.5	10	1,1,1,0,0,0,1,0,0,1,1,1,1,1	64.2857	0	0	1	0	3	2	4					0.544068
8	11	6	Fri	GL2	bar0	9	1		1,6,9	2	3	2	1	0	1,1	100	1	1	1	0	3	2	4					0
8	11	7	Fri	GL2	bar0	9	23		23,24,16,13,10,7,9	4	7	6	1.5	2	0,1,1,1,1,1	83.3333	0	1	1	0	3	2	4					0.176091
8	11	8	Fri	GL2	bar0	9	13		13,10,7,9	3	4	3	1	0	1,1,1	100	1	1	1	0	3	2	4					0
8	11	9	Fri	GL2	bar0	9	4		4,5,8,11,14,16,24,23,22,15,12,9	3	12	11	3.66667	8	0,1,0,0,1,0,1,1,1,1,1	63.6364	0	0	1	0	3	2	4					0.564271
8	11	10	Fri	GL2	bar0	9	15		15,13,10,7,3,7,9	2	7	6	3	4	0,1,1,0,1,1	66.6667	0	0	1	0	3	2	4					0.477121
8	11	11	Fri	GL2	bar0	9	8		8,5,4,3,7,9	3	6	5	1.66667	2	0,1,1,1,1	80	0	1	1	0	3	2	4					0.221849
8	11	12	Fri	GL2	bar0	9	18		18,19,20,21,22,15,12,9	3	8	7	2.33333	4	1,0,0,1,1,1,1	71.4286	0	0	1	0	3	2	4					0.367977
8	11	13	Fri	GL2	bar0	9	22		22,23,24,16,13,15,22,23,24,23,22,21,20,19,18,17,6,9	3	18	17	5.66667	14	0,0,1,1,1,0,0,0,1,1,0,1,1,0,1,1,1	58.8235	0	0	1	0	3	2	4					0.753328
8	11	14	Fri	GL2	bar0	9	11		11,8,10,13,15,22,23,24,23,22,21,20,19,18,17,6,9,7	4	17	16	4	12	1,1,0,1,0,0,0,1,1,0,1,1,0,1,1,1	62.5	0	0	0	0	3	2	4					0.60206
8	11	15	Fri	GL2	bar0	9	2		2,1,6,9	3	4	3	1	0	1,1,1	100	1	1	1	0	3	2	4					0
8	11	16	Fri	GL2	bar0	9	20		20,21,22,23,22,21,20,19,18,17,6,9,7	3	12	11	3.66667	8	0,1,0,1,0,1,1,0,1,1,1	63.6364	0	0	0	0	3	2	4					0.564271
8	11	17	Fri	GL2	bar0	9	10		10,13,16,14,11,8,10,13,15,12,19,20,21,22,23,22,15,12,9	2	19	18	9	16	0,0,0,1,1,1,0,1,1,0,0,0,1,0,1,1,1,1	55.5556	0	0	1	0	3	2	4					0.954243
8	11	18	Fri	GL2	bar0	9	17		17,18,19,20,21,22,23,24,16,13,10,7,9	2	13	12	6	10	0,1,0,0,1,0,0,1,1,1,1,1	58.3333	0	0	1	0	3	2	4					0.778151
8	11	19	Fri	GL2	bar0	9	16		16,24,23,22,15,12,9	4	7	6	1.5	2	0,1,1,1,1,1	83.3333	0	1	1	0	3	2	4					0.176091
8	11	20	Fri	GL2	bar0	9	19		19,18,17,6,9	2	5	4	2	2	0,1,1,1	75	0	1	1	0	3	2	4					0.30103
8	11	21	Fri	GL2	bar0	9	10		10,13,15,12,19,20,21,22,15,12,9	2	11	10	5	8	0,1,1,0,0,0,1,1,1,1	60	0	0	1	0	3	2	4					0.69897
8	11	22	Fri	GL2	bar0	9	24		24,16,13,15,12,19,20,21,22,23,24,16,13,10,7,9,6	5	16	15	3	10	1,1,1,1,0,0,0,1,0,0,1,1,1,1,1	66.6667	0	0	0	0	3	2	4					0.477121
8	11	23	Fri	GL2	bar0	9	1	mouse almost fell out	1,6,17,18,19,20,21,22,23,24,16,13,15,12,9,6	2	15	14	7	12	1,0,0,1,0,0,1,0,0,1,1,1,1,1	57.1429	0	0	0	0	3	2	4					0.845098
8	11	24	Fri	GL2	bar0	9	4		4,5,4,3,7,9,12	3	6	5	1.66667	2	0,1,1,1,1	80	0	1	0	1	3	2	4					0.221849
8	11	25	Fri	GL2	bar0	9	21		21,20,21,22,15,12,9,6	4	7	6	1.5	2	1,0,1,1,1,1	83.3333	0	1	0	1	3	2	4					0.176091
8	11	26	Fri	GL2	bar0	9	11		11,14,16,24,23,22,15,12,9	4	9	8	2	4	0,1,0,1,1,1,1,1	75	0	0	1	0	3	2	4					0.30103
8	11	27	Fri	GL2	bar0	9	3		3,7,9	2	3	2	1	0	1,1	100	1	1	1	0	3	2	4					0
8	11	28	Fri	GL2	bar0	9	13		13,16,24,23,22,15,12,9	3	8	7	2.33333	4	0,0,1,1,1,1,1	71.4286	0	1	1	0	3	2	4					0.367977
8	11	29	Fri	GL2	bar0	9	19	At 27:40 climbed the wall at node 20, test the new contrast	19,12,9,7	2	3	2	1	0	1,1	100	1	1	0	0	3	2	4					0
8	11	30	Fri	GL2	bar0	9	23		23,24,23,22,15,12,9	4	7	6	1.5	2	0,1,1,1,1,1	83.3333	0	1	1	1	3	2	4					0.176091
8	11	31	Fri	GL2	bar0	9	5		5,4,3,7,9	4	5	4	1	0	1,1,1,1	100	1	1	1	0	3	2	4					0
8	11	32	Fri	GL2	bar0	9	19		19,20,21,22,23,24,16,14,16,13,15,12,19,20,19,18,17,6,9,12	2	19	18	9	16	0,0,1,0,0,1,0,1,1,1,1,0,0,1,0,1,1,1	55.5556	0	0	0	0	3	2	4					0.954243
5	12	1	Mon	GL2	bar0	13	18	PROBE	18,17,6,9,7,10,13,15	4	7	6	1.5	2	0,1,1,1,1,1	83.3333	0	1	0	0	3	2	5			1		0.176091
5	12	2	Mon	GL2	bar0	13	5		5,8,10,13	3	4	3	1	0	1,1,1	100	1	1	1	0	3	2	5					0
5	12	3	Mon	GL2	bar0	13	21		21,20,19,18,17,6,9,7,3,4,5,8,10,13	3	14	13	4.33333	10	0,1,0,0,1,1,1,0,0,1,1,1,1	61.5385	0	0	1	0	3	2	5					0.636822
5	12	4	Mon	GL2	bar0	13	1		1,2,3,7,9,12,15,13	5	8	7	1.4	2	1,1,1,0,1,1,1	85.7143	0	0	1	0	3	2	5					0.146128
5	12	5	Mon	GL2	bar0	13	23		23,22,21,20,19,18,17,6,1,2,3,4,5,8,11,14,16,13	3	18	17	5.66667	14	1,0,0,1,0,0,1,0,1,1,0,1,1,0,1,1,1	58.8235	0	0	1	0	3	2	5					0.753328
5	12	6	Mon	GL2	bar0	13	19		19,20,21,22,15,13	3	6	5	1.66667	2	0,1,1,1,1	80	0	1	1	0	3	2	5					0.221849
5	12	7	Mon	GL2	bar0	13	8		8,5,4,3,7,10,13,16	2	7	6	3	4	0,0,1,1,1,1	66.6667	0	1	0	0	3	2	5					0.477121
5	12	8	Mon	GL2	bar0	13	20		20,21,22,15,13	4	5	4	1	0	1,1,1,1	100	1	1	1	0	3	2	5					0
5	12	9	Mon	GL2	bar0	13	5	PROBE	5,8,11,14,16,13,10	3	6	5	1.66667	2	1,0,1,1,1	80	0	1	0	0	3	2	5			9		0.221849
5	12	10	Mon	GL2	bar0	13	18		18,17,6,1,2,3,7,10,13	4	9	8	2	4	0,1,0,1,1,1,1,1	75	0	0	1	0	3	2	5					0.30103
5	12	11	Mon	GL2	bar0	13	7		7,3,4,5,8,10,13	2	7	6	3	4	0,0,1,1,1,1	66.6667	0	1	1	0	3	2	5					0.477121
5	12	12	Mon	GL2	bar0	13	23		23,22,15,13	3	4	3	1	0	1,1,1	100	1	1	1	0	3	2	5					0
5	12	13	Mon	GL2	bar0	13	2		2,1,6,17,18,19,20,21,22,15,13	4	11	10	2.5	6	0,1,0,1,1,0,1,1,1,1	70	0	0	1	0	3	2	5					0.39794
5	12	14	Mon	GL2	bar0	13	19		19,20,21,22,15,13,16	3	6	5	1.66667	2	0,1,1,1,1	80	0	1	0	0	3	2	5					0.221849
5	12	15	Mon	GL2	bar0	13	11		11,14,16,24,16,13	3	6	5	1.66667	2	1,1,0,1,1	80	0	0	1	0	3	2	5					0.221849
5	12	16	Mon	GL2	bar0	13	12		12,9,7,10,13	2	5	4	2	2	0,1,1,1	75	0	1	1	0	3	2	5					0.30103
5	12	17	Mon	GL2	bar0	13	5		5,8,10,13	3	4	3	1	0	1,1,1	100	1	1	1	0	3	2	5					0
5	12	18	Mon	GL2	bar0	13	6		6,1,2,3,7,10,13,10	4	7	6	1.5	2	0,1,1,1,1,1	83.3333	0	1	0	0	3	2	5					0.176091
5	12	19	Mon	GL2	bar0	13	14		14,16,24,23,22,21,20,19,18,17,6,1,2,3,4,5,8,10,13	2	19	18	9	16	1,0,0,1,0,0,1,0,0,1,0,1,1,0,1,1,1,1	55.5556	0	0	1	0	3	2	5					0.954243
5	12	20	Mon	GL2	bar0	13	18		18,17,18,19,12,15,13	4	7	6	1.5	2	0,1,1,1,1,1	83.3333	0	1	1	1	3	2	5					0.176091
5	12	21	Mon	GL2	bar0	13	4		4,5,8,10,13,15	4	5	4	1	0	1,1,1,1	100	1	1	0	0	3	2	5					0
5	12	22	Mon	GL2	bar0	13	12		12,19,18,17,6,9,12,15,13,16	2	9	8	4	6	0,0,0,1,1,1,1,1	62.5	0	0	0	0	3	2	5					0.60206
5	12	23	Mon	GL2	bar0	13	2		2,3,7,10,13,16	4	5	4	1	0	1,1,1,1	100	1	1	0	0	3	2	5					0
6	12	1	Mon	GL2	bar0	20	24	PROBE	24,23,22,15,13,16,24,23,22,21,20,19	4	11	10	2.5	6	1,1,0,0,0,1,1,1,1,1	70	0	0	0	0	3	2	5			1		0.39794
6	12	2	Mon	GL2	bar0	20	3		3,2,1,6,17,18,19,20	5	8	7	1.4	2	0,1,1,1,1,1,1	85.7143	0	1	1	0	3	2	5					0.146128
6	12	3	Mon	GL2	bar0	20	12		12,15,22,21,20	2	5	4	2	2	0,1,1,1	75	0	1	1	0	3	2	5					0.30103
6	12	4	Mon	GL2	bar0	20	5	instinctively removed a papertowel from the maze, after starting the mouse	5,8,10,7,3,2,1,6,9,12,15,13,16,14,16,24,23,22,21,20	7	20	19	2.71429	12	1,1,1,0,0,1,1,1,1,0,0,0,0,1,1,1,1,1,1	68.4211	0	0	1	0	3	2	5					0.433656
6	12	5	Mon	GL2	bar0	20	17		17,6,9,12,15,22,23,24,16,14,11,8,5,8,10,13,15,22,21,20	3	20	19	6.33333	16	0,1,1,0,1,0,0,0,0,0,1,0,1,1,1,1,1,1,1	57.8947	0	0	1	0	3	2	5					0.801632
6	12	6	Mon	GL2	bar0	20	11	started to wonder around a lot now. Climbing walls.	11,14,16,24,23,22,15,12,19,20,21	7	10	9	1.28571	2	1,1,1,1,1,0,1,1,1	88.8889	0	0	0	0	3	2	5					0.109144
6	12	7	Mon	GL2	bar0	20	1		1,2,3,4,5,8,11,14,16,24,23,22,15,12,19,18,17,6,1,2,3,4,5,8,11,14,16,24,23,22,21,20	5	32	31	6.2	26	0,1,0,0,1,0,1,1,1,1,1,0,1,1,0,0,0,0,0,1,0,0,1,0,1,1,1,1,1,1,1	58.0645	0	0	1	0	3	2	5					0.792392
6	12	8	Mon	GL2	bar0	20	4		4,5,8,10,7,9,12,19,20,21	6	9	8	1.33333	2	0,1,1,1,1,1,1,1	87.5	0	1	0	0	3	2	5					0.124939
6	12	9	Mon	GL2	bar0	20	17	PROBE	17,6,1,2,3,7,10,8,11,14,16,24,23,22,21,20,21	3	16	15	5	12	0,0,0,1,1,0,0,0,1,1,1,1,1,1,1	60	0	0	0	0	3	2	5			9		0.69897
6	12	10	Mon	GL2	bar0	20	24		24,23,22,21,20	4	5	4	1	0	1,1,1,1	100	1	1	1	0	3	2	5					0
6	12	11	Mon	GL2	bar0	20	9		9,7,10,13,15,22,21,20	3	8	7	2.33333	4	0,0,1,1,1,1,1	71.4286	0	1	1	0	3	2	5					0.367977
6	12	12	Mon	GL2	bar0	20	14		14,16,24,23,22,15,12,9,6,1,2,3,4,5,4,3,7,10,8,11,14,16,13,15,12,19,20	6	27	26	4.33333	20	1,1,1,1,0,1,0,0,0,0,1,0,0,1,1,1,0,0,0,1,1,1,1,1,1,1	61.5385	0	0	1	0	3	2	5					0.636822
6	12	13	Mon	GL2	bar0	20	7		7,10,13,15,22,21,20,21	4	7	6	1.5	2	0,1,1,1,1,1	83.3333	0	1	0	0	3	2	5					0.176091
6	12	14	Mon	GL2	bar0	20	18		18,19,20,21	2	3	2	1	0	1,1	100	1	1	0	0	3	2	5					0
6	12	15	Mon	GL2	bar0	20	13		13,16,24,23,24,16,14,11,8,5,4,3,2,1,6,17,18,19,12,9,7,3,4,5,8,11,8,10,7,9,6,1,6,17,18,19,20	4	37	36	9	32	0,1,1,0,0,0,0,1,0,1,1,0,1,1,1,1,1,0,0,0,0,0,0,1,0,1,1,1,1,0,0,1,1,1,1,1	55.5556	0	0	1	0	3	2	5					0.954243
6	12	16	Mon	GL2	bar0	20	3		3,4,5,8,11,14,11,14,16,24,23,22,21,20	5	14	13	2.6	8	0,0,1,0,1,0,1,1,1,1,1,1,1	69.2308	0	0	1	0	3	2	5					0.414973
7	12	1	Mon	GL2	bar0	5	13	PROBE	13,15,22,21,20,19,12,15,13,10,8,11,14,16,24,23,22,21,20,19,18,17,6,1,2,3,4,5,4	3	28	27	9	24	0,0,0,0,1,1,1,1,1,1,0,0,0,0,0,1,0,0,1,0,1,1,1,1,1,1,1	55.5556	0	0	0	0	3	2	5			1		0.954243
7	12	2	Mon	GL2	bar0	5	1		1,2,3,4,5	4	5	4	1	0	1,1,1,1	100	1	1	1	0	3	2	5					0
7	12	3	Mon	GL2	bar0	5	11		11,14,16,24,23,22,15,13,16,14,11,8,5	2	13	12	6	10	0,0,0,0,1,1,1,0,1,1,1,1	58.3333	0	0	1	0	3	2	5					0.778151
7	12	4	Mon	GL2	bar0	5	20		20,21,22,15,13,16,14,11,8,5,4	7	10	9	1.28571	2	1,1,1,1,0,1,1,1,1	88.8889	0	0	0	0	3	2	5					0.109144
7	12	5	Mon	GL2	bar0	5	3		3,2,3,7,10,13,15,12,9,6,1,2,3,4,5	2	15	14	7	12	0,1,0,1,0,0,0,1,0,1,1,1,1,1	57.1429	0	0	1	1	3	2	5					0.845098
7	12	6	Mon	GL2	bar0	5	22		22,23,22,15,13,16,24,23,22,21,20,19,18,17,6,1,2,3,4,5	5	20	19	3.8	14	0,1,1,1,0,0,0,1,0,0,1,0,1,1,1,1,1,1,1	63.1579	0	0	1	1	3	2	5					0.579784
7	12	7	Mon	GL2	bar0	5	17		17,6,9,7,3,4,5	6	7	6	1	0	1,1,1,1,1,1	100	1	1	1	0	3	2	5					0
7	12	8	Mon	GL2	bar0	5	14		14,16,13,15,12,9,6,1,2,3,4,5	3	12	11	3.66667	8	0,1,0,0,1,0,1,1,1,1,1	63.6364	0	0	1	0	3	2	5					0.564271
7	12	9	Mon	GL2	bar0	5	2	PROBE	2,1,6,9,7,3,4,5,4	3	8	7	2.33333	4	0,0,1,1,1,1,1	71.4286	0	1	0	0	3	2	5			9		0.367977
7	12	10	Mon	GL2	bar0	5	15		15,12,9,7,3,4,5	4	7	6	1.5	2	0,1,1,1,1,1	83.3333	0	1	1	0	3	2	5					0.176091
7	12	11	Mon	GL2	bar0	5	11		11,8,5	2	3	2	1	0	1,1	100	1	1	1	0	3	2	5					0
7	12	12	Mon	GL2	bar0	5	19		19,18,17,6,9,7,3,4,5	6	9	8	1.33333	2	0,1,1,1,1,1,1,1	87.5	0	1	1	0	3	2	5					0.124939
7	12	13	Mon	GL2	bar0	5	10		10,7,3,4,5	2	5	4	2	2	0,1,1,1	75	0	1	1	0	3	2	5					0.30103
7	12	14	Mon	GL2	bar0	5	3		3,2,1,6,9,12,19,20,21,22,23,24,16,14,16,24,23,22,15,13,16,24,23,22,21,20,19,18,17,6,1,2,3,4,5	2	35	34	17	32	0,0,0,1,0,0,0,1,1,0,1,1,1,0,0,0,1,1,1,0,0,0,1,0,0,1,0,1,1,1,1,1,1,1	52.9412	0	0	1	0	3	2	5					1.23045
7	12	15	Mon	GL2	bar0	5	20		20,19,12,15,13,15,22,21,20,19,18,17,6,1,2,3,7,10,8,5,4	7	20	19	2.71429	12	1,1,1,1,0,0,0,0,1,0,1,1,1,1,1,0,1,1,1	68.4211	0	0	0	0	3	2	5					0.433656
7	12	16	Mon	GL2	bar0	5	11		11,8,5,4	2	3	2	1	0	1,1	100	1	1	0	0	3	2	5					0
8	12	1	Mon	GL2	bar0	9	22	PROBE	22,23,24,16,13,15,22,23,24,16,14,11,8,10,7,9,6	3	16	15	5	12	0,0,1,1,1,0,0,0,1,0,1,1,1,1,1	60	0	0	0	0	3	2	5			1		0.69897
8	12	2	Mon	GL2	bar0	9	3		3,4,3,7,9	2	5	4	2	2	0,1,1,1	75	0	1	1	1	3	2	5					0.30103
8	12	3	Mon	GL2	bar0	9	20		20,21,22,23,24,16,13,15,12,9	3	10	9	3	6	0,1,0,0,1,1,1,1,1	66.6667	0	0	1	0	3	2	5					0.477121
8	12	4	Mon	GL2	bar0	9	13		13,16,24,23,22,15,12,9	3	8	7	2.33333	4	0,0,1,1,1,1,1	71.4286	0	1	1	0	3	2	5					0.367977
8	12	5	Mon	GL2	bar0	9	1		1,2,3,7,9,12	2	5	4	2	2	0,1,1,1	75	0	1	0	0	3	2	5					0.30103
8	12	6	Mon	GL2	bar0	9	11		11,14,16,13,10,7,9,6	4	7	6	1.5	2	0,1,1,1,1,1	83.3333	0	1	0	0	3	2	5					0.176091
8	12	7	Mon	GL2	bar0	9	24		24,23,22,23,24,23,22,15,12,9,6	5	10	9	1.8	4	1,1,0,0,1,1,1,1,1	77.7778	0	0	0	1	3	2	5					0.255273
8	12	8	Mon	GL2	bar0	9	17		17,18,19,18,17,6,1,2,3,7,9	2	11	10	5	8	0,1,0,1,1,0,0,1,1,1	60	0	0	1	1	3	2	5					0.69897
8	12	9	Mon	GL2	bar0	9	11	PROBE	11,14,16,13,10,7,9,7	4	7	6	1.5	2	0,1,1,1,1,1	83.3333	0	1	0	0	3	2	5			9		0.176091
8	12	10	Mon	GL2	bar0	9	1		1,6,17,18,19,20,19,12,9	2	9	8	4	6	1,0,0,1,0,1,1,1	62.5	0	0	1	0	3	2	5					0.60206
8	12	11	Mon	GL2	bar0	9	15		15,22,23,22,15,12,9,12	2	7	6	3	4	0,0,1,1,1,1	66.6667	0	1	0	1	3	2	5					0.477121
8	12	12	Mon	GL2	bar0	9	5		5,8,10,13,16,13,16,24,23,22,15,12,9,6	4	13	12	3	8	1,1,0,0,1,0,0,1,1,1,1,1	66.6667	0	0	0	0	3	2	5					0.477121
8	12	13	Mon	GL2	bar0	9	19		19,20,21,22,15,12,9,7	2	7	6	3	4	0,0,1,1,1,1	66.6667	0	1	0	0	3	2	5					0.477121
8	12	14	Mon	GL2	bar0	9	3		3,7,9,12	2	3	2	1	0	1,1	100	1	1	0	0	3	2	5					0
5	13	1	Wed	GL2	bar0	13	5		5,4,3,2,1,6,9,12,15,22,23,24,16,13	3	14	13	4.33333	10	0,1,0,0,1,1,1,1,0,0,1,1,1	61.5385	0	0	1	0	3	2	6					0.636822
5	13	2	Wed	GL2	bar0	13	2		2,3,7,10,13	4	5	4	1	0	1,1,1,1	100	1	1	1	0	3	2	6					0
5	13	3	Wed	GL2	bar0	13	21		21,22,15,12,9,7,10,13	3	8	7	2.33333	4	1,1,0,0,1,1,1	71.4286	0	0	1	0	3	2	6					0.367977
5	13	4	Wed	GL2	bar0	13	1		1,2,3,7,10,13	5	6	5	1	0	1,1,1,1,1	100	1	1	1	0	3	2	6					0
5	13	5	Wed	GL2	bar0	13	18		18,17,6,9,7,10,8,11,14,16,13	4	11	10	2.5	6	0,1,1,1,1,0,0,1,1,1	70	0	0	1	0	3	2	6					0.39794
5	13	6	Wed	GL2	bar0	13	8		8,11,14,16,24,23,22,21,22,23,24,16,13	2	13	12	6	10	0,1,1,0,0,1,0,1,0,1,1,1	58.3333	0	0	1	0	3	2	6					0.778151
5	13	7	Wed	GL2	bar0	13	12		12,9,6,1,2,3,7,10,13	2	9	8	4	6	0,0,0,1,1,1,1,1	62.5	0	0	1	0	3	2	6					0.60206
5	13	8	Wed	GL2	bar0	13	23		23,22,15,13,10	3	4	3	1	0	1,1,1	100	1	1	0	0	3	2	6					0
5	13	9	Wed	GL2	bar0	13	7		7,3,2,1,6,17,18,19,20,21,22,23,24,16,14,16,13	2	17	16	8	14	0,0,0,1,0,1,1,0,1,1,0,1,1,0,1,1	56.25	0	0	1	0	3	2	6					0.90309
5	13	10	Wed	GL2	bar0	13	21		21,22,15,13	3	4	3	1	0	1,1,1	100	1	1	1	0	3	2	6					0
5	13	11	Wed	GL2	bar0	13	4		4,5,8,11,14,16,13,10	4	7	6	1.5	2	1,1,0,1,1,1	83.3333	0	0	0	0	3	2	6					0.176091
5	13	12	Wed	GL2	bar0	13	19		19,20,21,22,23,24,16,13,15	3	8	7	2.33333	4	0,1,1,0,1,1,1	71.4286	0	0	0	0	3	2	6					0.367977
5	13	13	Wed	GL2	bar0	13	5		5,4,3,7,9,12,19,18,17,6,1,2,3,7,10,13,15	3	16	15	5	12	0,1,1,0,1,0,0,0,1,0,1,1,1,1,1	60	0	0	0	0	3	2	6					0.69897
5	13	14	Wed	GL2	bar0	13	9		9,6,1,2,3,7,10,8,11,14,16,13	3	12	11	3.66667	8	0,0,1,1,1,1,0,0,1,1,1	63.6364	0	0	1	0	3	2	6					0.564271
5	13	15	Wed	GL2	bar0	13	2	IB at 17:30: one of those, slow exlporing then fast DR.	2,1,6,17,18,19,20,21,22,21,20,19,12,9,6,1,2,1,6,17,18,17,18,19,20,21,22,15,13	4	29	28	7	24	0,1,0,1,1,0,1,1,0,0,1,1,0,0,0,1,0,1,0,1,0,1,1,0,1,1,1,1	57.1429	0	0	1	0	3	2	6					0.845098
5	13	16	Wed	GL2	bar0	13	19		19,18,17,6,9,12,15,22,23,24,16,14,11,8,5,8,10,13	3	18	17	5.66667	14	0,0,1,1,1,1,0,0,1,1,0,0,1,0,1,1,1	58.8235	0	0	1	0	3	2	6					0.753328
5	13	17	Wed	GL2	bar0	13	11		11,14,16,24,23,22,21,20,19,12,15,13,16	3	12	11	3.66667	8	1,1,0,0,1,0,0,1,1,1,1	63.6364	0	0	0	0	3	2	6					0.564271
5	13	18	Wed	GL2	bar0	13	2		2,3,2,1,6,9,7,10,13	4	9	8	2	4	1,0,0,1,1,1,1,1	75	0	0	1	1	3	2	6					0.30103
5	13	19	Wed	GL2	bar0	13	24		24,16,13	2	3	2	1	0	1,1	100	1	1	1	0	3	2	6					0
5	13	20	Wed	GL2	bar0	13	9		9,6,17,18,19,12,15,13	3	8	7	2.33333	4	0,0,1,1,1,1,1	71.4286	0	1	1	0	3	2	6					0.367977
5	13	21	Wed	GL2	bar0	13	5		5,4,3,2,1,6,17,18,19,20,21,22,23,24,16,13,10	3	16	15	5	12	0,1,0,0,1,0,1,1,0,1,1,0,1,1,1	60	0	0	0	0	3	2	6					0.69897
6	13	1	Wed	GL2	bar0	20	17		17,6,9,12,19,20,21	3	6	5	1.66667	2	0,1,1,1,1	80	0	1	0	0	3	2	6					0.221849
6	13	2	Wed	GL2	bar0	20	4		4,3,2,1,6,17,18,19,20	6	9	8	1.33333	2	1,0,1,1,1,1,1,1	87.5	0	1	1	0	3	2	6					0.124939
6	13	3	Wed	GL2	bar0	20	12		12,15,22,21,20	2	5	4	2	2	0,1,1,1	75	0	1	1	0	3	2	6					0.30103
6	13	4	Wed	GL2	bar0	20	4		4,5,8,10,13,15,12,19,20	6	9	8	1.33333	2	0,1,1,1,1,1,1,1	87.5	0	1	1	0	3	2	6					0.124939
6	13	5	Wed	GL2	bar0	20	16		16,24,23,22,15,13,10,8,11,14,16,24,23,22,21,20	5	16	15	3	10	1,1,1,0,0,0,0,0,1,1,1,1,1,1,1	66.6667	0	0	1	0	3	2	6					0.477121
6	13	6	Wed	GL2	bar0	20	17	IB: at 4mins. Just froze at node 13, then did a DR.	17,6,9,12,15,13,16,13,15,22,21,20	3	12	11	3.66667	8	0,1,1,0,0,0,1,1,1,1,1	63.6364	0	0	1	0	3	2	6					0.564271
6	13	7	Wed	GL2	bar0	20	3		3,4,5,8,11,14,16,24,23,22,21,20	5	12	11	2.2	6	0,0,1,0,1,1,1,1,1,1,1	72.7273	0	0	1	0	3	2	6					0.342423
6	13	8	Wed	GL2	bar0	20	11		11,14,16,13,15,12,9,6,1,6,17,18,19,20	7	14	13	1.85714	6	1,1,1,1,1,0,0,0,1,1,1,1,1	76.9231	0	0	1	0	3	2	6					0.268845
6	13	9	Wed	GL2	bar0	20	12		12,15,22,23,24,16,14,11,8,5,4,3,2,1,2,3,7,9,6,17,18,19,20	2	23	22	11	20	0,1,0,0,0,0,0,1,0,1,1,0,1,0,1,1,1,0,1,1,1,1	54.5455	0	0	1	0	3	2	6					1.04139
6	13	10	Wed	GL2	bar0	20	4		4,5,8,10,13,15,22,21,20	6	9	8	1.33333	2	0,1,1,1,1,1,1,1	87.5	0	1	1	0	3	2	6					0.124939
6	13	11	Wed	GL2	bar0	20	1		1,6,17,18,19,20,21	5	6	5	1	0	1,1,1,1,1	100	1	1	0	0	3	2	6					0
6	13	12	Wed	GL2	bar0	20	23		23,24,16,13,10,8,5,4,3,2,1,6,17,18,19,20,21	3	16	15	5	12	0,0,1,0,0,0,1,1,0,1,1,1,1,1,1	60	0	0	0	0	3	2	6					0.69897
6	13	13	Wed	GL2	bar0	20	10		10,8,11,14,16,24,23,22,15,12,19,18,17,6,1,2,1,6,17,18,19,20,21	5	22	21	4.2	16	0,0,1,1,1,1,1,0,1,1,0,0,0,0,0,1,1,1,1,1,1	61.9048	0	0	0	0	3	2	6					0.623249
6	13	14	Wed	GL2	bar0	20	17		17,18,19,20	3	4	3	1	0	1,1,1	100	1	1	1	0	3	2	6					0
6	13	15	Wed	GL2	bar0	20	24		24,16,14,11,8,5,4,3,7,9,6,1,6,17,18,19,20,21	4	17	16	4	12	0,0,0,1,0,1,1,1,1,0,0,1,1,1,1,1	62.5	0	0	0	0	3	2	6					0.60206
6	13	16	Wed	GL2	bar0	20	1		1,2,3,7,10,13,16,24,23,22,21,20,19	5	12	11	2.2	6	0,1,1,0,1,0,1,1,1,1,1	72.7273	0	0	0	0	3	2	6					0.342423
6	13	17	Wed	GL2	bar0	20	4		4,5,8,10,7,3,2,1,6,17,18,19,20,21	6	13	12	2	6	0,1,1,1,0,0,1,1,1,1,1,1	75	0	0	0	0	3	2	6					0.30103
6	13	18	Wed	GL2	bar0	20	9		9,6,1,2,3,4,5,8,11,14,16,24,23,22,21,20	3	16	15	5	12	0,0,0,1,0,0,1,0,1,1,1,1,1,1,1	60	0	0	1	0	3	2	6					0.69897
6	13	19	Wed	GL2	bar0	20	14		14,16,13,15,22,21,20	6	7	6	1	0	1,1,1,1,1,1	100	1	1	1	0	3	2	6					0
6	13	20	Wed	GL2	bar0	20	12		12,15,22,21,20,19	2	5	4	2	2	0,1,1,1	75	0	1	0	0	3	2	6					0.30103
6	13	21	Wed	GL2	bar0	20	3		3,4,5,8,10,13,15,22,21,20	5	10	9	1.8	4	0,0,1,1,1,1,1,1,1	77.7778	0	1	1	0	3	2	6					0.255273
6	13	22	Wed	GL2	bar0	20	16		16,24,23,22,15,12,19,20	5	8	7	1.4	2	1,1,1,0,1,1,1	85.7143	0	0	1	0	3	2	6					0.146128
6	13	23	Wed	GL2	bar0	20	17		17,6,9,12,15,22,21,20	3	8	7	2.33333	4	0,1,1,0,1,1,1	71.4286	0	0	1	0	3	2	6					0.367977
6	13	24	Wed	GL2	bar0	20	22		22,23,24,16,13,15,12,19,20,19	2	9	8	4	6	0,0,0,1,1,1,1,1	62.5	0	0	0	0	3	2	6					0.60206
7	13	1	Wed	GL2	bar0	5	21		21,22,23,24,16,14,11,8,5	6	9	8	1.33333	2	1,0,1,1,1,1,1,1	87.5	0	1	1	0	3	2	6					0.124939
7	13	2	Wed	GL2	bar0	5	24		24,23,22,21,20,19,12,9,7,3,4,5	5	12	11	2.2	6	0,1,0,0,1,1,1,1,1,1,1	72.7273	0	0	1	0	3	2	6					0.342423
7	13	3	Wed	GL2	bar0	5	3		3,4,5	2	3	2	1	0	1,1	100	1	1	1	0	3	2	6					0
7	13	4	Wed	GL2	bar0	5	13		13,16,24,23,22,21,22,23,22,21,22,23,24,16,14,11,8,5	3	18	17	5.66667	14	0,0,0,1,0,1,0,1,0,1,0,1,1,1,1,1,1	58.8235	0	0	1	0	3	2	6					0.753328
7	13	5	Wed	GL2	bar0	5	17		17,18,19,20,21,22,15,13,10,8,5	6	11	10	1.66667	4	0,1,0,1,1,1,1,1,1,1	80	0	0	1	0	3	2	6					0.221849
7	13	6	Wed	GL2	bar0	5	10		10,13,15,12,9,7,3,4,5	2	9	8	4	6	0,0,0,1,1,1,1,1	62.5	0	0	1	0	3	2	6					0.60206
7	13	7	Wed	GL2	bar0	5	21		21,20,19,12,9,6,1,2,3,4,5	6	11	10	1.66667	4	0,1,1,1,0,1,1,1,1,1	80	0	0	1	0	3	2	6					0.221849
7	13	8	Wed	GL2	bar0	5	9		9,12,19,20,21,22,23,24,16,13,10,8,5,4	4	13	12	3	8	0,0,0,1,1,0,1,1,1,1,1,1	66.6667	0	0	0	0	3	2	6					0.477121
7	13	9	Wed	GL2	bar0	5	11		11,14,16,24,23,22,21,20,19,18,17,6,1,2,3,4,5	2	17	16	8	14	0,0,0,0,1,0,0,1,0,1,1,1,1,1,1,1	56.25	0	0	1	0	3	2	6					0.90309
7	13	10	Wed	GL2	bar0	5	3		3,7,10,8,5	2	5	4	2	2	0,1,1,1	75	0	1	1	0	3	2	6					0.30103
7	13	11	Wed	GL2	bar0	5	12		12,15,13,10,7,3,4,5	5	8	7	1.4	2	1,1,1,0,1,1,1	85.7143	0	0	1	0	3	2	6					0.146128
7	13	12	Wed	GL2	bar0	5	22		22,21,20,19,18,17,6,17,18,19,12,15,13,16,24,23,22,21,20,19,12,9,7,3,4,5	5	26	25	5	20	0,0,1,0,1,1,0,0,1,1,1,1,0,0,0,1,0,0,1,1,1,1,1,1,1	60	0	0	1	0	3	2	6					0.69897
7	13	13	Wed	GL2	bar0	5	10		10,7,3,4,5	2	5	4	2	2	0,1,1,1	75	0	1	1	0	3	2	6					0.30103
7	13	14	Wed	GL2	bar0	5	23		23,22,21,20,19,12,15,22,23,24,16,14,11,8,5	6	15	14	2.33333	8	1,0,0,1,1,1,0,0,1,1,1,1,1,1	71.4286	0	0	1	0	3	2	6					0.367977
7	13	15	Wed	GL2	bar0	5	1		1,2,3,4,5,8	4	5	4	1	0	1,1,1,1	100	1	1	0	0	3	2	6					0
7	13	16	Wed	GL2	bar0	5	14		14,16,13,15,22,21,20,19,18,17,6,1,2,3,4,5	3	16	15	5	12	0,1,0,0,0,0,1,0,1,1,1,1,1,1,1	60	0	0	1	0	3	2	6					0.69897
7	13	17	Wed	GL2	bar0	5	18		18,19,12,9,7,3,4,5	7	8	7	1	0	1,1,1,1,1,1,1	100	1	1	1	0	3	2	6					0
7	13	18	Wed	GL2	bar0	5	15		15,22,15,12,9,6,17,6,1,2,3,4,5	4	13	12	3	8	0,1,0,1,0,0,1,1,1,1,1,1	66.6667	0	0	1	1	3	2	6					0.477121
7	13	19	Wed	GL2	bar0	5	3		3,2,1,6,17,18,19,12,9,7,3,4,5	2	13	12	6	10	0,0,0,0,0,1,1,1,1,1,1,1	58.3333	0	0	1	0	3	2	6					0.778151
7	13	20	Wed	GL2	bar0	5	16		16,14,11,8,5	4	5	4	1	0	1,1,1,1	100	1	1	1	0	3	2	6					0
7	13	21	Wed	GL2	bar0	5	22		22,23,24,16,13,10,7,3,4,5	5	10	9	1.8	4	0,1,1,1,1,0,1,1,1	77.7778	0	0	1	0	3	2	6					0.255273
7	13	22	Wed	GL2	bar0	5	7		7,9,12,15,22,23,24,16,14,11,8,5,4	3	12	11	3.66667	8	0,0,1,0,0,1,1,1,1,1,1	63.6364	0	0	0	0	3	2	6					0.564271
7	13	23	Wed	GL2	bar0	5	11		11,14,16,24,23,22,15,12,9,6,1,2,3,4,5	2	15	14	7	12	0,0,0,0,1,1,0,1,0,1,1,1,1,1	57.1429	0	0	1	0	3	2	6					0.845098
7	13	24	Wed	GL2	bar0	5	1		1,6,17,18,19,20,21,22,15,12,9,7,10,8,5	4	15	14	3.5	10	0,0,0,1,0,1,1,1,0,1,1,1,1,1	64.2857	0	0	1	0	3	2	6					0.544068
7	13	25	Wed	GL2	bar0	5	12		12,15,13,10,8,5	5	6	5	1	0	1,1,1,1,1	100	1	1	1	0	3	2	6					0
7	13	26	Wed	GL2	bar0	5	21		21,20,19,18,17,6,1,2,3,4,5,8	6	11	10	1.66667	4	0,1,0,1,1,1,1,1,1,1	80	0	0	0	0	3	2	6					0.221849
7	13	27	Wed	GL2	bar0	5	2		2,1,6,9,7,3,2,3,4,5	3	10	9	3	6	0,0,1,1,1,0,1,1,1	66.6667	0	0	1	0	3	2	6					0.477121
7	13	28	Wed	GL2	bar0	5	9		9,6,1,2,3,4,5	4	7	6	1.5	2	0,1,1,1,1,1	83.3333	0	1	1	0	3	2	6					0.176091
8	13	1	Wed	GL2	bar0	9	11		11,8,10,7,9,6	4	5	4	1	0	1,1,1,1	100	1	1	0	0	3	2	6					0
8	13	2	Wed	GL2	bar0	9	2		2,1,6,9	3	4	3	1	0	1,1,1	100	1	1	1	0	3	2	6					0
8	13	3	Wed	GL2	bar0	9	20		20,21,22,15,12,9	3	6	5	1.66667	2	0,1,1,1,1	80	0	1	1	0	3	2	6					0.221849
8	13	4	Wed	GL2	bar0	9	8		8,5,4,3,7,9,12	3	6	5	1.66667	2	0,1,1,1,1	80	0	1	0	0	3	2	6					0.221849
8	13	5	Wed	GL2	bar0	9	18		18,19,12,9,6	3	4	3	1	0	1,1,1	100	1	1	0	0	3	2	6					0
8	13	6	Wed	GL2	bar0	9	3		3,2,1,6,9	2	5	4	2	2	0,1,1,1	75	0	1	1	0	3	2	6					0.30103
8	13	7	Wed	GL2	bar0	9	11		11,8,10,13,15,12,19,18,17,6,9	4	11	10	2.5	6	1,1,0,1,1,0,0,1,1,1	70	0	0	1	0	3	2	6					0.39794
8	13	8	Wed	GL2	bar0	9	20		20,21,22,23,24,16,14,11,8,10,7,9,6	3	12	11	3.66667	8	0,1,0,0,1,0,1,1,1,1,1	63.6364	0	0	0	0	3	2	6					0.564271
8	13	9	Wed	GL2	bar0	9	16		16,13,15,12,9,6	4	5	4	1	0	1,1,1,1	100	1	1	0	0	3	2	6					0
8	13	10	Wed	GL2	bar0	9	17		17,6,9,7	2	3	2	1	0	1,1	100	1	1	0	0	3	2	6					0
8	13	11	Wed	GL2	bar0	9	10		10,8,5,4,3,2,1,6,17,18,19,20,21,22,23,22,15,12,9	2	19	18	9	16	0,0,1,1,0,1,1,0,0,1,0,0,1,0,1,1,1,1	55.5556	0	0	1	0	3	2	6					0.954243
8	13	12	Wed	GL2	bar0	9	23		23,22,15,12,9	4	5	4	1	0	1,1,1,1	100	1	1	1	0	3	2	6					0
8	13	13	Wed	GL2	bar0	9	2		2,3,7,9,6	3	4	3	1	0	1,1,1	100	1	1	0	0	3	2	6					0
8	13	14	Wed	GL2	bar0	9	15		15,13,10,8,5,4,3,7,9,6	2	9	8	4	6	0,1,0,0,1,1,1,1	62.5	0	0	0	0	3	2	6					0.60206
8	13	15	Wed	GL2	bar0	9	3		3,7,9,12	2	3	2	1	0	1,1	100	1	1	0	0	3	2	6					0
8	13	16	Wed	GL2	bar0	9	16		16,24,16,13,10,7,9,12	4	7	6	1.5	2	0,1,1,1,1,1	83.3333	0	1	0	1	3	2	6					0.176091
8	13	17	Wed	GL2	bar0	9	2		2,1,6,17,18,19,12,9,6	3	8	7	2.33333	4	1,1,0,0,1,1,1	71.4286	0	0	0	0	3	2	6					0.367977
8	13	18	Wed	GL2	bar0	9	19		19,20,21,22,15,12,9,6	2	7	6	3	4	0,0,1,1,1,1	66.6667	0	1	0	0	3	2	6					0.477121
8	13	19	Wed	GL2	bar0	9	10		10,13,16,24,23,22,15,12,9	2	9	8	4	6	0,0,0,1,1,1,1,1	62.5	0	0	1	0	3	2	6					0.60206
8	13	20	Wed	GL2	bar0	9	22		22,21,20,19,18,17,6,9,7	3	8	7	2.33333	4	0,1,1,0,1,1,1	71.4286	0	0	0	0	3	2	6					0.367977
8	13	21	Wed	GL2	bar0	9	3		3,4,5,8,10,7,9,12	2	7	6	3	4	0,0,1,1,1,1	66.6667	0	1	0	0	3	2	6					0.477121
8	13	22	Wed	GL2	bar0	9	11		11,8,10,7,9,12	4	5	4	1	0	1,1,1,1	100	1	1	0	0	3	2	6					0
5	14	1	Fri	GL3	bar0	21	17		17,18,19,20,21	4	5	4	1	0	1,1,1,1	100	1	1	1	0	3	3	1					0
5	14	2	Fri	GL3	bar0	21	8		8,11,14,16,13,15,12,19,20,21	5	10	9	1.8	4	0,1,1,1,1,0,1,1,1	77.7778	0	0	1	0	3	3	1					0.255273
5	14	3	Fri	GL3	bar0	21	1		1,2,3,7,10,13,16,24,23,22,21	6	11	10	1.66667	4	0,1,1,1,1,0,1,1,1,1	80	0	0	1	0	3	3	1					0.221849
5	14	4	Fri	GL3	bar0	21	13		13,10,7,3,2,1,6,17,18,19,20,21	3	12	11	3.66667	8	0,0,0,0,1,1,1,1,1,1,1	63.6364	0	0	1	0	3	3	1					0.564271
5	14	5	Fri	GL3	bar0	21	5		5,4,3,7,10,13,15,22,21	6	9	8	1.33333	2	0,1,1,1,1,1,1,1	87.5	0	1	1	0	3	3	1					0.124939
5	14	6	Fri	GL3	bar0	21	16	went to old food. Stayed there	16,14,11,8,10,13,16,24,23,22,21	4	11	10	2.5	6	0,0,1,1,1,0,1,1,1,1	70	0	0	1	0	3	3	1					0.39794
5	14	7	Fri	GL3	bar0	21	19		19,18,17,6,9,7,10,8,11,14,16,24,23,22,21	2	15	14	7	12	0,0,0,1,0,1,0,0,1,1,1,1,1,1	57.1429	0	0	1	0	3	3	1					0.845098
5	14	8	Fri	GL3	bar0	21	8		8,5,4,3,4,5,8,10,13,15,22,21	5	12	11	2.2	6	0,0,1,0,1,1,1,1,1,1,1	72.7273	0	0	1	0	3	3	1					0.342423
5	14	9	Fri	GL3	bar0	21	12	IB at 8, went back to node 13 again, to the old location	12,15,13,10,7,3,4,5,8,10,13,15,22,21	3	14	13	4.33333	10	1,0,0,0,0,0,1,1,1,1,1,1,1	61.5385	0	0	1	0	3	3	1					0.636822
5	14	10	Fri	GL3	bar0	21	23		23,24,16,14,11,8,5,4,3,2,1,6,17,18,19,20,21	2	17	16	8	14	0,0,0,0,1,0,0,1,0,1,1,1,1,1,1,1	56.25	0	0	1	0	3	3	1					0.90309
5	14	11	Fri	GL3	bar0	21	10		10,8,11,14,16,13,10,7,9,12,15,22,21	4	13	12	3	8	0,0,1,1,1,0,0,1,1,1,1,1	66.6667	0	0	1	0	3	3	1					0.477121
5	14	12	Fri	GL3	bar0	21	6		6,1,2,3,4,5,8,11,14,16,24,23,22,21	5	14	13	2.6	8	0,0,1,0,1,1,0,1,1,1,1,1,1	69.2308	0	0	1	0	3	3	1					0.414973
5	14	13	Fri	GL3	bar0	21	13		13,16,24,23,22,21,20	3	6	5	1.66667	2	0,1,1,1,1	80	0	1	0	0	3	3	1					0.221849
5	14	14	Fri	GL3	bar0	21	18		18,19,20,21	3	4	3	1	0	1,1,1	100	1	1	1	0	3	3	1					0
5	14	15	Fri	GL3	bar0	21	3		3,4,5,8,10,13,15,22,21	6	9	8	1.33333	2	0,1,1,1,1,1,1,1	87.5	0	1	1	0	3	3	1					0.124939
5	14	16	Fri	GL3	bar0	21	15		15,12,9,7,10,13,15,22,21,20	2	9	8	4	6	0,0,0,1,1,1,1,1	62.5	0	0	0	0	3	3	1					0.60206
5	14	17	Fri	GL3	bar0	21	5		5,4,3,2,1,6,17,18,19,20,21,22	6	11	10	1.66667	4	0,1,0,1,1,1,1,1,1,1	80	0	0	0	0	3	3	1					0.221849
5	14	18	Fri	GL3	bar0	21	1		1,6,17,18,19,20,21	6	7	6	1	0	1,1,1,1,1,1	100	1	1	1	0	3	3	1					0
5	14	19	Fri	GL3	bar0	21	19		19,18,17,6,9,7,10,13,15,22,21	2	11	10	5	8	0,0,0,1,0,1,1,1,1,1	60	0	0	1	0	3	3	1					0.69897
5	14	20	Fri	GL3	bar0	21	8		8,11,14,16,24,23,22,15,13,16,24,23,22,21,20	5	14	13	2.6	8	0,1,1,1,1,1,0,0,0,1,1,1,1	69.2308	0	0	0	0	3	3	1					0.414973
5	14	21	Fri	GL3	bar0	21	14		14,16,24,23,22,21,20	5	6	5	1	0	1,1,1,1,1	100	1	1	0	0	3	3	1					0
6	14	1	Fri	GL3	bar0	1	5		5,8,10,7,9,12,19,20,21,22,23,24,16,13,15,22,21,20,19,18,17,6,1	4	23	22	5.5	18	0,1,1,1,0,0,0,0,1,0,0,1,1,1,0,0,1,1,1,1,1,1	59.0909	0	0	1	0	3	3	1					0.740363
6	14	2	Fri	GL3	bar0	1	15		15,13,10,8,11,14,16,24,23,22,21,20,19,18,17,6,1	4	17	16	4	12	0,1,0,0,0,1,0,1,1,0,1,1,1,1,1,1	62.5	0	0	1	0	3	3	1					0.60206
6	14	3	Fri	GL3	bar0	1	11		11,14,16,13,15,22,21,20,19,18,17,6,1	6	13	12	2	6	0,1,1,1,0,0,1,1,1,1,1,1	75	0	0	1	0	3	3	1					0.30103
6	14	4	Fri	GL3	bar0	1	18		18,19,20,21,20,21,22,15,13,10,7,3,2,1	3	14	13	4.33333	10	0,0,0,1,0,1,1,0,1,1,1,1,1	61.5385	0	0	1	0	3	3	1					0.636822
6	14	5	Fri	GL3	bar0	1	4		4,3,2,1	3	4	3	1	0	1,1,1	100	1	1	1	0	3	3	1					0
6	14	6	Fri	GL3	bar0	1	16		16,24,23,22,15,12,9,6,1	6	9	8	1.33333	2	0,1,1,1,1,1,1,1	87.5	0	1	1	0	3	3	1					0.124939
6	14	7	Fri	GL3	bar0	1	9		9,12,15,22,21,20,19,18,17,6,1	2	11	10	5	8	0,0,0,0,1,1,1,1,1,1	60	0	0	1	0	3	3	1					0.69897
6	14	8	Fri	GL3	bar0	1	23		23,22,15,12,9,6,1	6	7	6	1	0	1,1,1,1,1,1	100	1	1	1	0	3	3	1					0
6	14	9	Fri	GL3	bar0	1	19		19,18,17,6,1	4	5	4	1	0	1,1,1,1	100	1	1	1	0	3	3	1					0
6	14	10	Fri	GL3	bar0	1	3		3,4,5,8,10,13,15,22,21,20,19,18,17,6,1	2	15	14	7	12	0,0,0,1,0,1,0,0,1,1,1,1,1,1	57.1429	0	0	1	0	3	3	1					0.845098
6	14	11	Fri	GL3	bar0	1	12		12,19,18,17,6,1	3	6	5	1.66667	2	0,1,1,1,1	80	0	1	1	0	3	3	1					0.221849
6	14	12	Fri	GL3	bar0	1	8		8,5,4,3,2,1	5	6	5	1	0	1,1,1,1,1	100	1	1	1	0	3	3	1					0
6	14	13	Fri	GL3	bar0	1	18		18,19,20,21,22,15,13,10,8,5,4,3,2,1	3	14	13	4.33333	10	0,0,0,1,1,0,1,0,1,1,1,1,1	61.5385	0	0	1	0	3	3	1					0.636822
6	14	14	Fri	GL3	bar0	1	15		15,22,21,20,19,18,17,6,1	4	9	8	2	4	0,0,1,1,1,1,1,1	75	0	1	1	0	3	3	1					0.30103
6	14	15	Fri	GL3	bar0	1	24		24,23,22,15,12,19,18,17,6,1	7	10	9	1.28571	2	1,1,1,1,0,1,1,1,1	88.8889	0	0	1	0	3	3	1					0.109144
6	14	16	Fri	GL3	bar0	1	9		9,12,19,18,17,6,1	2	7	6	3	4	0,0,1,1,1,1	66.6667	0	1	1	0	3	3	1					0.477121
6	14	17	Fri	GL3	bar0	1	21		21,22,23,24,16,14,16,13,10,7,9,6,1	6	13	12	2	6	1,0,0,1,0,1,1,1,1,1,1,1	75	0	0	1	0	3	3	1					0.30103
6	14	18	Fri	GL3	bar0	1	17		17,18,19,12,15,22,23,24,23,22,21,20,19,18,17,6,1,2	2	17	16	8	14	0,0,1,0,0,0,0,1,1,0,1,1,1,1,1,1	56.25	0	0	0	0	3	3	1					0.90309
6	14	19	Fri	GL3	bar0	1	3		3,2,1	2	3	2	1	0	1,1	100	1	1	1	0	3	3	1					0
6	14	20	Fri	GL3	bar0	1	20		20,21,22,23,24,16,14,11,8,5,4,3,2,1	5	14	13	2.6	8	0,1,0,0,1,0,1,1,1,1,1,1,1	69.2308	0	0	1	0	3	3	1					0.414973
6	14	21	Fri	GL3	bar0	1	15		15,13,10,8,5,4,3,2,1	4	9	8	2	4	0,1,0,1,1,1,1,1	75	0	0	1	0	3	3	1					0.30103
6	14	22	Fri	GL3	bar0	1	5		5,4,3,2,1	4	5	4	1	0	1,1,1,1	100	1	1	1	0	3	3	1					0
6	14	23	Fri	GL3	bar0	1	23		23,22,21,20,21,22,23,22,15,12,9,6,1,2	6	13	12	2	6	1,0,1,0,1,0,1,1,1,1,1,1	75	0	0	0	0	3	3	1					0.30103
6	14	24	Fri	GL3	bar0	1	10		10,13,15,22,21,20,21,22,15,12,19,20,19,20,21,22,15,12,9,6,1	4	21	20	5	16	0,1,0,0,1,0,1,1,1,0,0,1,0,0,1,1,1,1,1,1	60	0	0	1	0	3	3	1					0.69897
6	14	25	Fri	GL3	bar0	1	18		18,19,20,21,20,19,18,17,6,1	3	10	9	3	6	0,0,0,1,1,1,1,1,1	66.6667	0	0	1	0	3	3	1					0.477121
6	14	26	Fri	GL3	bar0	1	3		3,2,1	2	3	2	1	0	1,1	100	1	1	1	0	3	3	1					0
6	14	27	Fri	GL3	bar0	1	14		14,16,24,23,22,15,12,9,6,1,2	7	10	9	1.28571	2	1,0,1,1,1,1,1,1,1	88.8889	0	1	0	0	3	3	1					0.109144
6	14	28	Fri	GL3	bar0	1	9		9,12,19,20,19,18,17,6,1,6	2	9	8	4	6	0,0,0,1,1,1,1,1	62.5	0	0	0	0	3	3	1					0.60206
7	14	1	Fri	GL3	bar0	7	24		24,16,14,11,8,5,4,3,7	4	9	8	2	4	1,0,1,1,0,1,1,1	75	0	0	1	0	3	3	1					0.30103
7	14	2	Fri	GL3	bar0	7	17		17,6,9,7	3	4	3	1	0	1,1,1	100	1	1	1	0	3	3	1					0
7	14	3	Fri	GL3	bar0	7	14		14,16,24,23,22,21,20,19,18,17,6,1,2,3,4,5,4,3,7	4	19	18	4.5	14	1,0,0,1,0,1,1,0,1,1,0,1,1,0,0,1,1,1	61.1111	0	0	1	0	3	3	1					0.653213
7	14	4	Fri	GL3	bar0	7	19	IB at 2:30	19,18,17,6,1,2,3,4,5,8,10,7	3	12	11	3.66667	8	0,1,1,0,1,1,0,0,1,1,1	63.6364	0	0	1	0	3	3	1					0.564271
7	14	5	Fri	GL3	bar0	7	11		11,8,5,4,3,7	3	6	5	1.66667	2	1,0,1,1,1	80	0	1	1	0	3	3	1					0.221849
7	14	6	Fri	GL3	bar0	7	15		15,22,21,20,19,12,9,7	3	8	7	2.33333	4	0,0,1,1,1,1,1	71.4286	0	1	1	0	3	3	1					0.367977
7	14	7	Fri	GL3	bar0	7	2		2,1,6,17,18,19,12,9,7	2	9	8	4	6	0,1,0,0,1,1,1,1	62.5	0	0	1	0	3	3	1					0.60206
7	14	8	Fri	GL3	bar0	7	13		13,16,24,23,22,15,12,9,6,1,2,3,7	2	13	12	6	10	0,0,0,1,1,1,1,0,0,1,1,1	58.3333	0	0	1	0	3	3	1					0.778151
7	14	9	Fri	GL3	bar0	7	21		21,20,19,12,9,7,3	5	6	5	1	0	1,1,1,1,1	100	1	1	0	0	3	3	1					0
7	14	10	Fri	GL3	bar0	7	8		8,11,14,16,13,10,7	2	7	6	3	4	0,0,1,1,1,1	66.6667	0	1	1	0	3	3	1					0.477121
7	14	11	Fri	GL3	bar0	7	20		20,21,22,23,24,16,14,11,8,5,4,3,2,1,6,17,18,19,12,9,7,3	4	21	20	5	16	0,1,0,1,1,0,1,1,0,1,1,0,0,1,0,0,1,1,1,1	60	0	0	0	0	3	3	1					0.69897
7	14	12	Fri	GL3	bar0	7	5		5,4,3,7	3	4	3	1	0	1,1,1	100	1	1	1	0	3	3	1					0
7	14	13	Fri	GL3	bar0	7	6		6,17,18,19,20,21,22,23,24,16,13,10,8,5,4,3,7	2	17	16	8	14	0,0,1,0,0,1,0,1,1,1,1,0,0,1,1,1	56.25	0	0	1	0	3	3	1					0.90309
7	14	14	Fri	GL3	bar0	7	4		4,5,8,10,7,3	2	5	4	2	2	0,1,1,1	75	0	1	0	0	3	3	1					0.30103
7	14	15	Fri	GL3	bar0	7	22		22,23,24,16,14,11,8,5,4,3,7	4	11	10	2.5	6	0,1,1,0,1,1,0,1,1,1	70	0	0	1	0	3	3	1					0.39794
7	14	16	Fri	GL3	bar0	7	17		17,6,9,12,19,20,21,22,23,24,16,13,10,8,5,4,5,8,10,13,16,14,11,8,5,4,3,7	3	28	27	9	24	1,1,0,0,0,0,1,0,1,1,1,1,0,0,1,0,1,1,0,0,0,1,1,0,1,1,1	55.5556	0	0	1	0	3	3	1					0.954243
7	14	17	Fri	GL3	bar0	7	13		13,16,14,11,8,5,4,3,7	2	9	8	4	6	0,0,1,1,0,1,1,1	62.5	0	0	1	0	3	3	1					0.60206
7	14	18	Fri	GL3	bar0	7	23		23,24,16,14,11,8,5,4,3,7	5	10	9	1.8	4	1,1,0,1,1,0,1,1,1	77.7778	0	0	1	0	3	3	1					0.255273
7	14	19	Fri	GL3	bar0	7	6		6,17,18,19,12,9,7,3	2	7	6	3	4	0,0,1,1,1,1	66.6667	0	1	0	0	3	3	1					0.477121
7	14	20	Fri	GL3	bar0	7	4		4,3,7	2	3	2	1	0	1,1	100	1	1	1	0	3	3	1					0
7	14	21	Fri	GL3	bar0	7	14		14,16,13,10,8,5,4,3,7	4	9	8	2	4	1,1,1,0,0,1,1,1	75	0	0	1	0	3	3	1					0.30103
7	14	22	Fri	GL3	bar0	7	12		12,19,20,21,22,23,24,16,13,10,7	2	11	10	5	8	0,0,0,1,0,1,1,1,1,1	60	0	0	1	0	3	3	1					0.69897
7	14	23	Fri	GL3	bar0	7	8		8,11,14,16,24,16,13,10,7	2	9	8	4	6	0,0,1,0,1,1,1,1	62.5	0	0	1	0	3	3	1					0.60206
7	14	24	Fri	GL3	bar0	7	15		15,12,9,6,17,6,9,7,3	3	8	7	2.33333	4	1,1,0,0,1,1,1	71.4286	0	0	0	0	3	3	1					0.367977
7	14	25	Fri	GL3	bar0	7	20		20,19,18,17,6,9,7	4	7	6	1.5	2	1,0,1,1,1,1	83.3333	0	1	1	0	3	3	1					0.176091
7	14	26	Fri	GL3	bar0	7	13		13,16,14,11,8,10,7	2	7	6	3	4	0,0,1,1,1,1	66.6667	0	1	1	0	3	3	1					0.477121
7	14	27	Fri	GL3	bar0	7	6		6,17,18,19,12,9,7,3	2	7	6	3	4	0,0,1,1,1,1	66.6667	0	1	0	0	3	3	1					0.477121
7	14	28	Fri	GL3	bar0	7	5		5,4,3,7	3	4	3	1	0	1,1,1	100	1	1	1	0	3	3	1					0
7	14	29	Fri	GL3	bar0	7	21		21,20,19,18,17,6,9,7,10	5	8	7	1.4	2	1,1,0,1,1,1,1	85.7143	0	0	0	0	3	3	1					0.146128
7	14	30	Fri	GL3	bar0	7	13		13,15,12,19,18,17,6,17,18,19,12,9,7,3	2	13	12	6	10	0,1,0,0,1,1,0,0,1,1,1,1	58.3333	0	0	0	0	3	3	1					0.778151
8	14	1	Fri	GL3	bar0	11	23		23,24,16,13,10,7,3,2,1,6,17,18,19,12,15,13,10,7,9,6,17,18,19,20,21,22,23,24,16,13,10,7,3,4,5,8,10,7,9,12,15,22,21,20,19,12,9,7,10,13,15,12,9,6,1,2,3,7,9,12,19,18,17,6,9,12,15,22,23,22,15,12,9,7,10,13,16,24,23,22,15,12,9,6,1,2,3,4,5,8,11	4	91	90	22.5	86	1,1,0,1,0,0,0,0,1,0,0,1,1,1,1,1,0,0,0,0,0,1,0,1,1,1,1,1,0,1,0,0,1,1,1,0,0,0,0,1,0,0,0,1,1,1,1,1,0,0,0,1,0,0,1,1,1,0,0,0,0,1,1,1,0,1,0,1,0,1,0,1,1,1,0,1,0,0,0,1,0,1,0,0,1,1,1,1,1,1	52.2222	0	0	1	0	3	3	1					1.35218
8	14	2	Fri	GL3	bar0	11	21		21,22,23,24,16,14,11	6	7	6	1	0	1,1,1,1,1,1	100	1	1	1	0	3	3	1					0
8	14	3	Fri	GL3	bar0	11	5		5,4,3,2,1,6,17,18,19,20,21,22,23,24,16,14,11	2	17	16	8	14	0,0,0,0,1,0,0,1,0,1,1,1,1,1,1,1	56.25	0	0	1	0	3	3	1					0.90309
8	14	4	Fri	GL3	bar0	11	22		22,23,24,16,14,11	5	6	5	1	0	1,1,1,1,1	100	1	1	1	0	3	3	1					0
8	14	5	Fri	GL3	bar0	11	17		17,6,9,7,10,8,11	6	7	6	1	0	1,1,1,1,1,1	100	1	1	1	0	3	3	1					0
8	14	6	Fri	GL3	bar0	11	10		10,13,16,24,23,22,15,12,9,6,1,2,3,4,5,8,11	2	17	16	8	14	0,1,0,0,0,1,0,1,0,0,1,1,1,1,1,1	56.25	0	0	1	0	3	3	1					0.90309
8	14	7	Fri	GL3	bar0	11	19		19,18,17,6,9,12,15,13,16,14,11	6	11	10	1.66667	4	0,1,1,1,0,1,1,1,1,1	80	0	0	1	0	3	3	1					0.221849
8	14	8	Fri	GL3	bar0	11	7		7,9,12,19,20,21,22,23,24,16,14,11	3	12	11	3.66667	8	0,0,0,0,1,1,1,1,1,1,1	63.6364	0	0	1	0	3	3	1					0.564271
8	14	9	Fri	GL3	bar0	11	16		16,14,11	2	3	2	1	0	1,1	100	1	1	1	0	3	3	1					0
8	14	10	Fri	GL3	bar0	11	2		2,3,7,10,8,11	5	6	5	1	0	1,1,1,1,1	100	1	1	1	0	3	3	1					0
8	14	11	Fri	GL3	bar0	11	23		23,22,15,12,9,6,17,18,19,20,21,22,15,13,10,7,3,2,1,6,17,18,19,12,15,13,16,14,11	4	29	28	7	24	0,1,0,1,0,0,0,1,0,1,1,1,1,1,0,0,0,0,1,0,0,1,1,1,1,1,1,1	57.1429	0	0	1	0	3	3	1					0.845098
8	14	12	Fri	GL3	bar0	11	5		5,4,3,7,9,12,15,22,15,13,10,8,11	2	13	12	6	10	0,0,1,0,0,1,0,1,1,1,1,1	58.3333	0	0	1	0	3	3	1					0.778151
8	14	13	Fri	GL3	bar0	11	12		12,19,20,21,22,23,24,16,14,11	5	10	9	1.8	4	0,0,1,1,1,1,1,1,1	77.7778	0	1	1	0	3	3	1					0.255273
8	14	14	Fri	GL3	bar0	11	4		4,5,8,11	3	4	3	1	0	1,1,1	100	1	1	1	0	3	3	1					0
8	14	15	Fri	GL3	bar0	11	17		17,18,19,12,9,7,10,8,11	6	9	8	1.33333	2	0,1,1,1,1,1,1,1	87.5	0	1	1	0	3	3	1					0.124939
8	14	16	Fri	GL3	bar0	11	13		13,16,24,23,22,21,20,19,12,9,7,10,8,11	3	14	13	4.33333	10	1,0,0,0,0,0,1,1,1,1,1,1,1	61.5385	0	0	1	0	3	3	1					0.636822
8	14	17	Fri	GL3	bar0	11	6		6,17,18,19,12,15,13,16,24,23,22,15,12,9,12,19,20,21,20,21,20,19,18,17,6,9,7,10,13,15,12,19,20,19,12,9,7,10,8,11	5	40	39	7.8	34	0,0,1,1,1,1,1,0,0,0,1,0,1,0,0,0,1,0,1,0,1,0,1,1,1,1,1,0,0,0,0,0,1,1,1,1,1,1,1	56.4103	0	0	1	0	3	3	1					0.892095
8	14	18	Fri	GL3	bar0	11	23		23,24,16,13,10,8,11	4	7	6	1.5	2	1,1,0,1,1,1	83.3333	0	0	1	0	3	3	1					0.176091
8	14	19	Fri	GL3	bar0	11	3		3,4,5,8,11	4	5	4	1	0	1,1,1,1	100	1	1	1	0	3	3	1					0
8	14	20	Fri	GL3	bar0	11	9		9,12,15,13,10,8,11	4	7	6	1.5	2	0,1,1,1,1,1	83.3333	0	1	1	0	3	3	1					0.176091
8	14	21	Fri	GL3	bar0	11	5		5,8,11	2	3	2	1	0	1,1	100	1	1	1	0	3	3	1					0
8	14	22	Fri	GL3	bar0	11	22		22,21,20,19,18,17,6,9,12,19,20,21,22,23,24,16,14,11,14	5	18	17	3.4	12	0,0,1,0,1,1,1,0,0,0,1,1,1,1,1,1,1	64.7059	0	0	0	0	3	3	1					0.531479
8	14	23	Fri	GL3	bar0	11	16		16,24,16,14,11	2	5	4	2	2	0,1,1,1	75	0	1	1	1	3	3	1					0.30103
8	14	24	Fri	GL3	bar0	11	6		6,17,18,19,20,21,22,15,13,10,8,11,8	5	12	11	2.2	6	0,0,1,0,1,1,1,1,1,1,1	72.7273	0	0	0	0	3	3	1					0.342423
8	14	25	Fri	GL3	bar0	11	19		19,20,21,22,15,13,10,8,5,4,3,4,5,8,11	6	15	14	2.33333	8	0,1,1,1,1,1,1,0,0,0,1,1,1,1	71.4286	0	0	1	0	3	3	1					0.367977
8	14	26	Fri	GL3	bar0	11	7		7,3,2,1,6,17,18,19,12,9,12,15,22,21,20,19,18,17,6,1,2,3,7,10,8,11	3	26	25	8.33333	22	0,0,0,1,0,0,1,1,1,0,1,0,0,0,1,0,1,1,0,1,1,1,1,1,1	56	0	0	1	0	3	3	1					0.920819
8	14	27	Fri	GL3	bar0	11	5		5,8,11	2	3	2	1	0	1,1	100	1	1	1	0	3	3	1					0
8	14	28	Fri	GL3	bar0	11	20		20,21,22,15,13,10,7,9,6,17,18,19,12,9,7,10,8,11,14	7	18	17	2.42857	10	1,1,1,1,1,0,0,0,0,0,1,1,1,1,1,1,1	70.5882	0	0	0	0	3	3	1					0.385351
8	14	29	Fri	GL3	bar0	11	17		17,6,9,12,15,13,16,14,11	6	9	8	1.33333	2	1,1,0,1,1,1,1,1	87.5	0	0	1	0	3	3	1					0.124939
5	15	1	Mon	GL3	bar0	21	24	PROBE	24,16,14,11,8,10,7,9,12,19,20,21,22	3	12	11	3.66667	8	0,0,0,1,1,0,1,1,1,1,1	63.6364	0	0	0	0	3	3	2			1		0.564271
5	15	2	Mon	GL3	bar0	21	13		13,10,8,11,14,16,13,15,22,21	3	10	9	3	6	0,0,0,1,1,1,1,1,1	66.6667	0	0	1	0	3	3	2					0.477121
5	15	3	Mon	GL3	bar0	21	2		2,1,6,9,7,10,13,15,22,21	7	10	9	1.28571	2	1,1,1,0,1,1,1,1,1	88.8889	0	0	1	0	3	3	2					0.109144
5	15	4	Mon	GL3	bar0	21	24	IB at 4: panick run and then DR	24,16,13,10,7,3,2,1,6,9,12,15,22,21	3	14	13	4.33333	10	0,1,0,0,0,0,1,1,1,1,1,1,1	61.5385	0	0	1	0	3	3	2					0.636822
5	15	5	Mon	GL3	bar0	21	17		17,18,19,20,21	4	5	4	1	0	1,1,1,1	100	1	1	1	0	3	3	2					0
5	15	6	Mon	GL3	bar0	21	11		11,8,5,4,3,2,1,6,17,18,19,20,21	6	13	12	2	6	1,0,0,1,0,1,1,1,1,1,1,1	75	0	0	1	0	3	3	2					0.30103
5	15	7	Mon	GL3	bar0	21	5		5,4,3,7,10,8,11,14,16,13,15,22,21	6	13	12	2	6	0,1,1,1,0,0,1,1,1,1,1,1	75	0	0	1	0	3	3	2					0.30103
5	15	8	Mon	GL3	bar0	21	15		15,12,19,18,17,6,9,7,10,8,5,4,5,8,11,14,16,24,23,22,21	2	21	20	10	18	0,1,0,0,0,1,0,1,0,0,0,1,1,0,1,1,1,1,1,1	55	0	0	1	0	3	3	2					1
5	15	9	Mon	GL3	bar0	21	17	PROBE	17,18,19,20,21,22	4	5	4	1	0	1,1,1,1	100	1	1	0	0	3	3	2			9		0
5	15	10	Mon	GL3	bar0	21	24		24,16,14,11,8,10,7,3,4,5,8,11,14,16,24,23,22,21	3	18	17	5.66667	14	0,0,0,1,1,0,0,0,1,1,0,1,1,1,1,1,1	58.8235	0	0	1	0	3	3	2					0.753328
5	15	11	Mon	GL3	bar0	21	9		9,6,17,18,19,20,21	4	7	6	1.5	2	0,1,1,1,1,1	83.3333	0	1	1	0	3	3	2					0.176091
5	15	12	Mon	GL3	bar0	21	5		5,4,3,7,10,13,15,22,21,20	6	9	8	1.33333	2	0,1,1,1,1,1,1,1	87.5	0	1	0	0	3	3	2					0.124939
5	15	13	Mon	GL3	bar0	21	19		19,18,17,6,9,12,15,22,21,22	2	9	8	4	6	0,0,0,1,1,1,1,1	62.5	0	0	0	0	3	3	2					0.60206
5	15	14	Mon	GL3	bar0	21	14		14,11,8,10,13,16,24,23,22,21,20	5	10	9	1.8	4	0,1,1,1,0,1,1,1,1	77.7778	0	0	0	0	3	3	2					0.255273
5	15	15	Mon	GL3	bar0	21	17		17,18,17,6,1,2,3,7,10,8,10,7,10,13,15,22,21,20	4	17	16	4	12	1,0,0,0,0,1,1,1,0,1,0,1,1,1,1,1	62.5	0	0	0	1	3	3	2					0.60206
5	15	16	Mon	GL3	bar0	21	10		10,7,3,2,1,6,17,18,19,20,21,22	4	11	10	2.5	6	0,0,0,1,1,1,1,1,1,1	70	0	0	0	0	3	3	2					0.39794
6	15	1	Mon	GL3	bar0	1	23	PROBE	23,22,21,20,19,18,17,6,1,2	6	9	8	1.33333	2	1,0,1,1,1,1,1,1	87.5	0	1	0	0	3	3	2			1		0.124939
6	15	2	Mon	GL3	bar0	1	9		9,12,19,18,17,6,1	2	7	6	3	4	0,0,1,1,1,1	66.6667	0	1	1	0	3	3	2					0.477121
6	15	3	Mon	GL3	bar0	1	5	circled!	5,8,11,14,16,24,23,22,21,20,19,18,17,6,1	4	15	14	3.5	10	0,0,0,1,0,1,1,0,1,1,1,1,1,1	64.2857	0	0	1	0	3	3	2					0.544068
6	15	4	Mon	GL3	bar0	1	13		13,16,24,23,22,21,20,19,18,17,6,1	5	12	11	2.2	6	0,0,1,1,0,1,1,1,1,1,1	72.7273	0	0	1	0	3	3	2					0.342423
6	15	5	Mon	GL3	bar0	1	12		12,15,13,16,14,11,8,10,7,3,2,1	3	12	11	3.66667	8	0,0,0,0,1,1,1,1,1,1,1	63.6364	0	0	1	0	3	3	2					0.564271
6	15	6	Mon	GL3	bar0	1	3		3,7,9,12,19,20,21,22,23,24,16,14,11,8,10,7,9,6,17,18,19,20,21,22,15,13,10,7,3,2,1	2	31	30	15	28	0,1,0,0,0,0,1,0,0,1,0,1,1,1,1,1,1,0,0,0,0,0,1,1,0,1,1,1,1,1	53.3333	0	0	1	0	3	3	2					1.17609
6	15	7	Mon	GL3	bar0	1	15		15,22,21,20,19,18,17,6,1	4	9	8	2	4	0,0,1,1,1,1,1,1	75	0	1	1	0	3	3	2					0.30103
6	15	8	Mon	GL3	bar0	1	17		17,6,1	2	3	2	1	0	1,1	100	1	1	1	0	3	3	2					0
6	15	9	Mon	GL3	bar0	1	5	PROBE	5,8,10,13,15,12,19,18,17,6,1,2	4	11	10	2.5	6	0,1,0,1,1,0,1,1,1,1	70	0	0	0	0	3	3	2			9		0.39794
6	15	10	Mon	GL3	bar0	1	12		12,19,20,21,22,23,24,16,14,11,8,5,4,3,7,10,8,11,14,16,24,23,22,21,20,19,18,17,6,1	3	30	29	9.66667	26	0,0,0,1,0,0,1,0,1,1,1,1,1,0,0,0,0,0,1,0,1,1,0,1,1,1,1,1,1	55.1724	0	0	1	0	3	3	2					0.985277
6	15	11	Mon	GL3	bar0	1	3		3,4,5,8,10,13,15,22,21,20,19,18,17,6,1	2	15	14	7	12	0,0,0,1,0,1,0,0,1,1,1,1,1,1	57.1429	0	0	1	0	3	3	2					0.845098
6	15	12	Mon	GL3	bar0	1	16		16,14,11,8,5,4,3,2,1	6	9	8	1.33333	2	0,1,1,1,1,1,1,1	87.5	0	1	1	0	3	3	2					0.124939
6	15	13	Mon	GL3	bar0	1	18		18,19,12,9,7,3,2,1	3	8	7	2.33333	4	0,1,1,0,1,1,1	71.4286	0	0	1	0	3	3	2					0.367977
6	15	14	Mon	GL3	bar0	1	4	circle	4,5,8,11,14,16,24,23,22,21,20,19,18,17,6,1	3	16	15	5	12	0,0,0,0,1,0,1,1,0,1,1,1,1,1,1	60	0	0	1	0	3	3	2					0.69897
6	15	15	Mon	GL3	bar0	1	11		11,8,5,4,3,2,1	6	7	6	1	0	1,1,1,1,1,1	100	1	1	1	0	3	3	2					0
6	15	16	Mon	GL3	bar0	1	15		15,22,23,24,16,13,10,7,3,2,1	4	11	10	2.5	6	0,0,0,1,1,1,1,1,1,1	70	0	0	1	0	3	3	2					0.39794
6	15	17	Mon	GL3	bar0	1	17		17,18,17,6,1	2	5	4	2	2	0,1,1,1	75	0	1	1	1	3	3	2					0.30103
6	15	18	Mon	GL3	bar0	1	14	circled	14,16,24,23,22,21,20,19,18,17,6,1	7	12	11	1.57143	4	1,0,1,1,0,1,1,1,1,1,1	81.8182	0	0	1	0	3	3	2					0.196295
6	15	19	Mon	GL3	bar0	1	12		12,19,18,17,6,1	3	6	5	1.66667	2	0,1,1,1,1	80	0	1	1	0	3	3	2					0.221849
6	15	20	Mon	GL3	bar0	1	3		3,4,5,8,11,14,16,24,23,22,21,20,19,18,17,6,1	2	17	16	8	14	0,0,0,0,0,1,0,1,1,0,1,1,1,1,1,1	56.25	0	0	1	0	3	3	2					0.90309
6	15	21	Mon	GL3	bar0	1	22		22,21,20,19,18,17,6,1	5	8	7	1.4	2	0,1,1,1,1,1,1	85.7143	0	1	1	0	3	3	2					0.146128
6	15	22	Mon	GL3	bar0	1	5		5,8,10,7,9,6,1,2	4	7	6	1.5	2	0,1,1,1,1,1	83.3333	0	1	0	0	3	3	2					0.176091
6	15	23	Mon	GL3	bar0	1	9		9,12,15,22,23,24,16,14,11,8,5,4,3,2,1	2	15	14	7	12	0,0,0,0,0,1,0,1,1,1,1,1,1,1	57.1429	0	0	1	0	3	3	2					0.845098
6	15	24	Mon	GL3	bar0	1	20		20,21,22,15,13,10,7,3,2,1	5	10	9	1.8	4	0,1,1,0,1,1,1,1,1	77.7778	0	0	1	0	3	3	2					0.255273
6	15	25	Mon	GL3	bar0	1	23		23,24,23,22,21,20,19,12,9,6,1	6	11	10	1.66667	4	0,1,1,0,1,1,1,1,1,1	80	0	0	1	1	3	3	2					0.221849
6	15	26	Mon	GL3	bar0	1	10		10,8,5,4,3,2,1,6	4	7	6	1.5	2	0,1,1,1,1,1	83.3333	0	1	0	0	3	3	2					0.176091
7	15	1	Mon	GL3	bar0	7	20	PROBE	20,19,18,17,6,9,7,3	4	7	6	1.5	2	1,0,1,1,1,1	83.3333	0	1	0	0	3	3	2			1		0.176091
7	15	2	Mon	GL3	bar0	7	17		17,6,9,7	3	4	3	1	0	1,1,1	100	1	1	1	0	3	3	2					0
7	15	3	Mon	GL3	bar0	7	15		15,22,21,20,19,18,17,6,9,7	3	10	9	3	6	0,0,1,1,0,1,1,1,1	66.6667	0	0	1	0	3	3	2					0.477121
7	15	4	Mon	GL3	bar0	7	2	IB at 3:45: initial panick, then rear then DR	2,1,6,17,6,9,7	2	7	6	3	4	0,1,0,1,1,1	66.6667	0	0	1	0	3	3	2					0.477121
7	15	5	Mon	GL3	bar0	7	13		13,15,22,21,20,19,18,17,6,9,7	2	11	10	5	8	0,0,0,1,1,0,1,1,1,1	60	0	0	1	0	3	3	2					0.69897
7	15	6	Mon	GL3	bar0	7	18		18,17,6,1,2,3,7	4	7	6	1.5	2	1,1,0,1,1,1	83.3333	0	0	1	0	3	3	2					0.176091
7	15	7	Mon	GL3	bar0	7	8		8,11,14,16,13,10,7	2	7	6	3	4	0,0,1,1,1,1	66.6667	0	1	1	0	3	3	2					0.477121
7	15	8	Mon	GL3	bar0	7	12		12,19,18,17,6,9,7	2	7	6	3	4	0,0,1,1,1,1	66.6667	0	1	1	0	3	3	2					0.477121
7	15	9	Mon	GL3	bar0	7	11	PROBE	11,14,16,24,23,22,15,12,9,6,17,18,19,12,9,6,1,2,3,4,5,8,10,13,16	3	25	50	16.6667	47	0,1,0,0,1,1,1,1,0,0,0,1,1,1,0,0,1,1,0,0,1,1,0,0	50	0	0	0	0	3	3	2			9		1.22185
7	15	10	Mon	GL3	bar0	7	24		24,23,22,15,12,9,7	4	7	6	1.5	2	0,1,1,1,1,1	83.3333	0	1	1	0	3	3	2					0.176091
7	15	11	Mon	GL3	bar0	7	6		6,9,7	2	3	2	1	0	1,1	100	1	1	1	0	3	3	2					0
7	15	12	Mon	GL3	bar0	7	15		15,13,10,7	3	4	3	1	0	1,1,1	100	1	1	1	0	3	3	2					0
7	15	13	Mon	GL3	bar0	7	17		17,18,19,12,9,7	3	6	5	1.66667	2	0,1,1,1,1	80	0	1	1	0	3	3	2					0.221849
7	15	14	Mon	GL3	bar0	7	13		13,15,12,19,18,17,6,9,7	2	9	8	4	6	0,1,0,0,1,1,1,1	62.5	0	0	1	0	3	3	2					0.60206
7	15	15	Mon	GL3	bar0	7	21		21,22,15,12,9,7	5	6	5	1	0	1,1,1,1,1	100	1	1	1	0	3	3	2					0
7	15	16	Mon	GL3	bar0	7	2		2,3,4,5,8,10,7	2	7	6	3	4	1,0,0,1,1,1	66.6667	0	0	1	0	3	3	2					0.477121
7	15	17	Mon	GL3	bar0	7	19		19,20,21,22,23,24,16,14,11,8,5,4,3,7,10	3	14	13	4.33333	10	0,0,1,0,1,1,0,1,1,0,1,1,1	61.5385	0	0	0	0	3	3	2					0.636822
7	15	18	Mon	GL3	bar0	7	23		23,22,15,12,9,6,17,18,19,20,21,22,15,13,10,8,5,4,3,2,3,7	5	22	21	4.2	16	1,1,1,1,0,0,0,1,0,0,1,1,1,1,0,0,1,1,0,1,1	61.9048	0	0	1	0	3	3	2					0.623249
7	15	19	Mon	GL3	bar0	7	4		4,5,8,11,14,16,13,10,7	2	9	8	4	6	0,1,0,0,1,1,1,1	62.5	0	0	1	0	3	3	2					0.60206
7	15	20	Mon	GL3	bar0	7	13		13,15,22,23,24,16,14,11,8,5,8,11,8,10,7,9	2	15	14	7	12	0,0,0,1,1,0,1,1,0,1,0,1,1,1	57.1429	0	0	0	0	3	3	2					0.845098
7	15	21	Mon	GL3	bar0	7	18		18,19,12,9,7,3	4	5	4	1	0	1,1,1,1	100	1	1	0	0	3	3	2					0
7	15	22	Mon	GL3	bar0	7	24		24,23,22,15,12,19,18,17,6,1,2,3,7	4	13	12	3	8	0,1,1,1,0,0,1,1,0,1,1,1	66.6667	0	0	1	0	3	3	2					0.477121
8	15	1	Mon	GL3	bar0	11	4	PROBE	4,3,7,9,12,15,22,23,24,16,13,15,22,21,20,19,18,17,6,9,7,3,4,5,8,11,14	3	26	25	8.33333	22	0,1,0,0,1,0,1,1,1,0,0,0,0,0,1,0,1,1,1,1,0,1,1,1,1	56	0	0	0	0	3	3	2			1		0.920819
8	15	2	Mon	GL3	bar0	11	9	circle	9,6,17,18,19,20,21,22,23,24,16,14,11	4	13	12	3	8	0,0,0,1,0,1,1,1,1,1,1,1	66.6667	0	0	1	0	3	3	2					0.477121
8	15	3	Mon	GL3	bar0	11	16		16,14,11	2	3	2	1	0	1,1	100	1	1	1	0	3	3	2					0
8	15	4	Mon	GL3	bar0	11	18	circled	18,19,20,21,22,23,24,16,14,11	7	10	9	1.28571	2	1,0,1,1,1,1,1,1,1	88.8889	0	1	1	0	3	3	2					0.109144
8	15	5	Mon	GL3	bar0	11	7		7,10,8,11	3	4	3	1	0	1,1,1	100	1	1	1	0	3	3	2					0
8	15	6	Mon	GL3	bar0	11	23	circled?	23,24,16,13,10,7,9,6,17,18,19,20,21,22,23,24,16,14,11	4	19	18	4.5	14	1,1,0,1,0,0,0,0,0,1,0,1,1,1,1,1,1,1	61.1111	0	0	1	0	3	3	2					0.653213
8	15	7	Mon	GL3	bar0	11	4		4,3,7,9,12,15,22,23,24,16,14,11	3	12	11	3.66667	8	0,1,0,0,1,0,1,1,1,1,1	63.6364	0	0	1	0	3	3	2					0.564271
8	15	8	Mon	GL3	bar0	11	13		13,15,22,23,24,16,14,11	3	8	7	2.33333	4	0,0,1,1,1,1,1	71.4286	0	1	1	0	3	3	2					0.367977
8	15	9	Mon	GL3	bar0	11	17	PROBE: circled	17,18,19,20,21,22,23,24,16,14,11,8	6	11	10	1.66667	4	0,1,0,1,1,1,1,1,1,1	80	0	0	0	0	3	3	2			9		0.221849
8	15	10	Mon	GL3	bar0	11	16		16,24,23,22,21,20,19,18,17,6,9,7,10,8,11	2	15	14	7	12	0,0,0,0,0,1,0,1,1,1,1,1,1,1	57.1429	0	0	1	0	3	3	2					0.845098
8	15	11	Mon	GL3	bar0	11	20		20,21,22,23,24,16,13,10,8,11	7	10	9	1.28571	2	1,1,1,1,1,0,1,1,1	88.8889	0	0	1	0	3	3	2					0.109144
8	15	12	Mon	GL3	bar0	11	6		6,1,2,3,4,5,8,11	5	8	7	1.4	2	0,1,1,1,1,1,1	85.7143	0	1	1	0	3	3	2					0.146128
8	15	13	Mon	GL3	bar0	11	5		5,4,3,7,10,13,15,22,21,20,19,18,17,6,9,7,10,8,11	2	19	18	9	16	0,0,1,1,0,0,0,0,0,1,0,1,1,1,1,1,1,1	55.5556	0	0	1	0	3	3	2					0.954243
8	15	14	Mon	GL3	bar0	11	15		15,12,19,20,21,22,23,24,16,13,10,7,3,2,1,6,9,12,15,13,16,14,11	4	23	22	5.5	18	0,0,0,1,1,1,1,1,0,1,0,0,0,0,1,1,0,1,1,1,1,1	59.0909	0	0	1	0	3	3	2					0.740363
8	15	15	Mon	GL3	bar0	11	7		7,9,12,15,13,16,14,11	3	8	7	2.33333	4	0,0,1,1,1,1,1	71.4286	0	1	1	0	3	3	2					0.367977
8	15	16	Mon	GL3	bar0	11	23		23,24,16,13,10,7,9,6,17,6,1,2,3,4,5,8,11	4	17	16	4	12	1,1,0,1,0,0,0,0,1,0,1,1,1,1,1,1	62.5	0	0	1	0	3	3	2					0.60206
8	15	17	Mon	GL3	bar0	11	19	circled	19,18,17,6,1,2,3,4,5,8,11	6	11	10	1.66667	4	0,1,1,0,1,1,1,1,1,1	80	0	0	1	0	3	3	2					0.221849
8	15	18	Mon	GL3	bar0	11	5		5,8,11	2	3	2	1	0	1,1	100	1	1	1	0	3	3	2					0
8	15	19	Mon	GL3	bar0	11	9		9,6,17,18,17,6,9,7,10,8,11	4	11	10	2.5	6	0,0,0,1,1,1,1,1,1,1	70	0	0	1	0	3	3	2					0.39794
8	15	20	Mon	GL3	bar0	11	16		16,24,16,14,11	2	5	4	2	2	0,1,1,1	75	0	1	1	1	3	3	2					0.30103
8	15	21	Mon	GL3	bar0	11	18		18,19,12,9,7,10,8,11	7	8	7	1	0	1,1,1,1,1,1,1	100	1	1	1	0	3	3	2					0
8	15	22	Mon	GL3	bar0	11	13		13,15,22,23,24,16,14,11	3	8	7	2.33333	4	0,0,1,1,1,1,1	71.4286	0	1	1	0	3	3	2					0.367977
8	15	23	Mon	GL3	bar0	11	6		6,1,2,3,4,5,8,11,14	5	8	7	1.4	2	0,1,1,1,1,1,1	85.7143	0	1	0	0	3	3	2					0.146128
8	15	24	Mon	GL3	bar0	11	23		23,22,21,20,19,18,17,6,9,7,3,4,5,8,11	4	15	14	3.5	10	0,0,0,1,0,1,1,1,1,0,1,1,1,1	64.2857	0	0	1	0	3	3	2					0.544068
8	15	25	Mon	GL3	bar0	11	2		2,1,6,9,12,15,22,21,20,19,18,17,6,1,2,3,4,5,8,11,14	5	20	19	3.8	14	0,1,1,0,1,0,0,0,1,0,1,1,0,1,1,1,1,1,1	63.1579	0	0	0	0	3	3	2					0.579784
8	15	26	Mon	GL3	bar0	11	17		17,6,1,2,3,7,10,8,11,14	6	9	8	1.33333	2	1,0,1,1,1,1,1,1	87.5	0	1	0	0	3	3	2					0.124939
8	15	27	Mon	GL3	bar0	11	5		5,8,11	2	3	2	1	0	1,1	100	1	1	1	0	3	3	2					0
8	15	28	Mon	GL3	bar0	11	1		1,6,9,12,19,20,21,22,15,13,10,8,11	6	13	12	2	6	1,1,0,0,0,1,1,1,1,1,1,1	75	0	0	1	0	3	3	2					0.30103
5	16	1	Wed	GL3	bar0	21	5		5,4,3,2,1,6,9,12,15,22,21	6	11	10	1.66667	4	0,1,0,1,1,1,1,1,1,1	80	0	0	1	0	3	3	3					0.221849
5	16	2	Wed	GL3	bar0	21	7		7,10,13,15,22,21	5	6	5	1	0	1,1,1,1,1	100	1	1	1	0	3	3	3					0
5	16	3	Wed	GL3	bar0	21	15		15,12,19,18,19,20,21	2	7	6	3	4	0,1,0,1,1,1	66.6667	0	0	1	0	3	3	3					0.477121
5	16	4	Wed	GL3	bar0	21	6		6,9,12,19,20,21	5	6	5	1	0	1,1,1,1,1	100	1	1	1	0	3	3	3					0
5	16	5	Wed	GL3	bar0	21	10		10,7,3,4,5,8,10,13,15,22,21	4	11	10	2.5	6	0,0,0,1,1,1,1,1,1,1	70	0	0	1	0	3	3	3					0.39794
5	16	6	Wed	GL3	bar0	21	17		17,18,19,20,21	4	5	4	1	0	1,1,1,1	100	1	1	1	0	3	3	3					0
5	16	7	Wed	GL3	bar0	21	13		13,10,8,11,14,16,24,23,22,21	3	10	9	3	6	0,0,0,1,1,1,1,1,1	66.6667	0	0	1	0	3	3	3					0.477121
5	16	8	Wed	GL3	bar0	21	5		5,4,3,2,1,6,9,12,19,20,21,22	6	11	10	1.66667	4	0,1,0,1,1,1,1,1,1,1	80	0	0	0	0	3	3	3					0.221849
5	16	9	Wed	GL3	bar0	21	15		15,12,9,7,10,13,15,22,21,20	2	9	8	4	6	0,0,0,1,1,1,1,1	62.5	0	0	0	0	3	3	3					0.60206
5	16	10	Wed	GL3	bar0	21	18		18,17,6,9,7,10,7,10,8,5,8,5,4,3,2,1,6,9,7,10,7,3,4,5,8,11,14,16,24,23,22,21	3	32	31	10.3333	28	0,0,1,0,1,0,1,0,0,1,0,0,1,0,1,1,1,0,1,0,0,0,1,1,0,1,1,1,1,1,1	54.8387	0	0	1	0	3	3	3					1.01424
5	16	11	Wed	GL3	bar0	21	9		9,6,17,18,19,12,15,22,21	4	9	8	2	4	0,1,1,1,0,1,1,1	75	0	0	1	0	3	3	3					0.30103
5	16	12	Wed	GL3	bar0	21	8		8,5,4,3,7,9,12,19,20,21,22	5	10	9	1.8	4	0,0,1,1,1,1,1,1,1	77.7778	0	1	0	0	3	3	3					0.255273
5	16	13	Wed	GL3	bar0	21	19		19,12,15,22,21	2	5	4	2	2	0,1,1,1	75	0	1	1	0	3	3	3					0.30103
5	16	14	Wed	GL3	bar0	21	7		7,3,4,5,8,10,13,15,12,19,18,17,6,1,2,3,4,5,8,11,14,16,24,23,22,21,22	5	26	25	5	20	0,0,1,1,1,1,1,0,1,0,0,0,0,0,1,0,1,1,0,1,1,1,1,1,1	60	0	0	0	0	3	3	3					0.69897
5	16	15	Wed	GL3	bar0	21	13	IB: a lot of rearing towards end of exploration	13,16,24,23,22,21,20	3	6	5	1.66667	2	0,1,1,1,1	80	0	1	0	0	3	3	3					0.221849
5	16	16	Wed	GL3	bar0	21	17		17,18,19,12,15,22,23,22,21,22	4	9	8	2	4	1,1,0,1,1,0,1,1	75	0	0	0	0	3	3	3					0.30103
5	16	17	Wed	GL3	bar0	21	2		2,1,6,17,18,19,20,21,22	7	8	7	1	0	1,1,1,1,1,1,1	100	1	1	0	0	3	3	3					0
5	16	18	Wed	GL3	bar0	21	15	circling but only after he had already passed the food, seemed more like a random burst of energy	15,13,16,24,23,22,21,20	2	7	6	3	4	0,0,1,1,1,1	66.6667	0	1	0	0	3	3	3					0.477121
5	16	19	Wed	GL3	bar0	21	8		8,11,14,16,24,23,24,16,14,11,8,5,4,3,2,1,6,1,2,3,7,10,13,15,22,21,20	5	26	25	5	20	0,1,1,1,1,0,0,0,0,1,0,0,1,0,1,1,0,0,1,1,1,1,1,1,1	60	0	0	0	0	3	3	3					0.69897
6	16	1	Wed	GL3	bar0	1	12		12,15,22,23,24,16,13,10,7,3,2,1	3	12	11	3.66667	8	0,0,0,0,1,1,1,1,1,1,1	63.6364	0	0	1	0	3	3	3					0.564271
6	16	2	Wed	GL3	bar0	1	4	circling	4,5,8,11,14,16,24,23,22,21,20,19,18,17,6,1	3	16	15	5	12	0,0,0,0,1,0,1,1,0,1,1,1,1,1,1	60	0	0	1	0	3	3	3					0.69897
6	16	3	Wed	GL3	bar0	1	15		15,22,21,20,19,18,17,6,1	4	9	8	2	4	0,0,1,1,1,1,1,1	75	0	1	1	0	3	3	3					0.30103
6	16	4	Wed	GL3	bar0	1	17		17,18,19,12,15,13,16,14,11,8,10,7,3,2,1	2	15	14	7	12	0,0,1,0,0,0,0,1,1,1,1,1,1,1	57.1429	0	0	1	0	3	3	3					0.845098
6	16	5	Wed	GL3	bar0	1	13		13,15,12,19,18,17,6,1	5	8	7	1.4	2	1,1,0,1,1,1,1	85.7143	0	0	1	0	3	3	3					0.146128
6	16	6	Wed	GL3	bar0	1	18		18,19,20,21,22,15,13,16,14,11,8,5,4,3,2,1	3	16	15	5	12	0,0,0,1,1,0,0,0,1,1,1,1,1,1,1	60	0	0	1	0	3	3	3					0.69897
6	16	7	Wed	GL3	bar0	1	10		10,8,5,4,3,7,9,6,17,18,19,12,15,22,15,22,23,22,21,20,19,12,9,6,1	4	25	24	6	20	0,1,1,1,0,1,1,0,0,0,1,0,0,1,0,0,1,0,1,1,1,1,1,1	58.3333	0	0	1	0	3	3	3					0.778151
6	16	8	Wed	GL3	bar0	1	4		4,3,7,10,8,5,4,3,2,1	3	10	9	3	6	1,0,0,0,1,1,1,1,1	66.6667	0	0	1	0	3	3	3					0.477121
6	16	9	Wed	GL3	bar0	1	9		9,12,19,18,17,6,1	2	7	6	3	4	0,0,1,1,1,1	66.6667	0	1	1	0	3	3	3					0.477121
6	16	10	Wed	GL3	bar0	1	14		14,16,24,23,22,15,12,9,6,1	7	10	9	1.28571	2	1,0,1,1,1,1,1,1,1	88.8889	0	1	1	0	3	3	3					0.109144
6	16	11	Wed	GL3	bar0	1	22		22,21,20,19,18,17,6,1	5	8	7	1.4	2	0,1,1,1,1,1,1	85.7143	0	1	1	0	3	3	3					0.146128
6	16	12	Wed	GL3	bar0	1	17		17,18,19,20,21,22,15,13,10,7,3,2,1	2	13	12	6	10	0,0,0,0,1,1,0,1,1,1,1,1	58.3333	0	0	1	0	3	3	3					0.778151
6	16	13	Wed	GL3	bar0	1	10		10,13,16,14,16,24,23,22,21,20,19,18,17,6,1	4	15	14	3.5	10	0,0,0,1,0,1,1,0,1,1,1,1,1,1	64.2857	0	0	1	0	3	3	3					0.544068
6	16	14	Wed	GL3	bar0	1	18		18,17,6,1	3	4	3	1	0	1,1,1	100	1	1	1	0	3	3	3					0
6	16	15	Wed	GL3	bar0	1	4		4,3,2,1	3	4	3	1	0	1,1,1	100	1	1	1	0	3	3	3					0
6	16	16	Wed	GL3	bar0	1	13		13,15,22,23,22,21,20,19,18,17,6,1	5	12	11	2.2	6	1,0,0,1,0,1,1,1,1,1,1	72.7273	0	0	1	0	3	3	3					0.342423
6	16	17	Wed	GL3	bar0	1	23		23,24,16,14,11,8,10,7,9,6,1	6	11	10	1.66667	4	0,1,0,1,1,1,1,1,1,1	80	0	0	1	0	3	3	3					0.221849
6	16	18	Wed	GL3	bar0	1	3		3,4,5,8,10,7,3,2,1	2	9	8	4	6	0,0,0,1,1,1,1,1	62.5	0	0	1	0	3	3	3					0.60206
6	16	19	Wed	GL3	bar0	1	15		15,22,21,20,19,18,17,6,1	4	9	8	2	4	0,0,1,1,1,1,1,1	75	0	1	1	0	3	3	3					0.30103
6	16	20	Wed	GL3	bar0	1	7		7,9,6,1,2	3	4	3	1	0	1,1,1	100	1	1	0	0	3	3	3					0
6	16	21	Wed	GL3	bar0	1	5		5,8,10,7,3,2,1	4	7	6	1.5	2	0,1,1,1,1,1	83.3333	0	1	1	0	3	3	3					0.176091
6	16	22	Wed	GL3	bar0	1	20	ate at 10 and 20, rearing in lower quadrants	20,19,12,9,7,10,8,11,14,16,24,23,22,21,20,19,18,17,6,1,2	5	20	19	3.8	14	1,1,1,0,0,0,0,0,1,0,1,1,0,1,1,1,1,1,1	63.1579	0	0	0	0	3	3	3					0.579784
6	16	23	Wed	GL3	bar0	1	15		15,22,23,22,21,22,23,24,23,22,21,20,21,22,15,13,15,22,21,22,15,13,10,7,9,6,1	4	27	26	6.5	22	0,0,1,0,1,0,0,1,1,0,1,0,1,1,0,1,0,0,1,1,0,1,1,1,1,1	57.6923	0	0	1	1	3	3	3					0.812913
6	16	24	Wed	GL3	bar0	1	17		17,6,1	2	3	2	1	0	1,1	100	1	1	1	0	3	3	3					0
6	16	25	Wed	GL3	bar0	1	21		21,20,19,18,17,6,1	6	7	6	1	0	1,1,1,1,1,1	100	1	1	1	0	3	3	3					0
6	16	26	Wed	GL3	bar0	1	9		9,7,3,7,9,6,1	2	7	6	3	4	0,1,0,1,1,1	66.6667	0	0	1	1	3	3	3					0.477121
6	16	27	Wed	GL3	bar0	1	22		22,21,20,19,18,17,6,1,2	5	8	7	1.4	2	0,1,1,1,1,1,1	85.7143	0	1	0	0	3	3	3					0.146128
7	16	1	Wed	GL3	bar0	7	17		17,6,1,2,3,7	3	6	5	1.66667	2	1,0,1,1,1	80	0	1	1	0	3	3	3					0.221849
7	16	2	Wed	GL3	bar0	7	11		11,14,16,24,23,22,15,12,9,7	3	10	9	3	6	0,1,0,0,1,1,1,1,1	66.6667	0	0	1	0	3	3	3					0.477121
7	16	3	Wed	GL3	bar0	7	12		12,15,13,10,7	2	5	4	2	2	0,1,1,1	75	0	1	1	0	3	3	3					0.30103
7	16	4	Wed	GL3	bar0	7	5		5,4,3,7	3	4	3	1	0	1,1,1	100	1	1	1	0	3	3	3					0
7	16	5	Wed	GL3	bar0	7	13		13,15,22,23,24,16,13,10,8,5,4,3,7	2	13	12	6	10	0,0,0,1,1,1,1,0,0,1,1,1	58.3333	0	0	1	0	3	3	3					0.778151
7	16	6	Wed	GL3	bar0	7	2		2,3,7	2	3	2	1	0	1,1	100	1	1	1	0	3	3	3					0
7	16	7	Wed	GL3	bar0	7	15		15,22,21,20,19,18,17,6,9,7,10	3	10	9	3	6	0,0,1,1,0,1,1,1,1	66.6667	0	0	0	0	3	3	3					0.477121
7	16	8	Wed	GL3	bar0	7	24		24,23,22,21,20,19,18,17,6,9,7	4	11	10	2.5	6	0,1,0,1,1,0,1,1,1,1	70	0	0	1	0	3	3	3					0.39794
7	16	9	Wed	GL3	bar0	7	12		12,19,18,17,6,9,7	2	7	6	3	4	0,0,1,1,1,1	66.6667	0	1	1	0	3	3	3					0.477121
7	16	10	Wed	GL3	bar0	7	11		11,8,5,4,3,7	3	6	5	1.66667	2	1,0,1,1,1	80	0	1	1	0	3	3	3					0.221849
7	16	11	Wed	GL3	bar0	7	6		6,17,18,19,12,15,13,10,7	2	9	8	4	6	0,0,1,1,0,1,1,1	62.5	0	0	1	0	3	3	3					0.60206
7	16	12	Wed	GL3	bar0	7	13	circling	13,15,12,9,6,17,18,19,20,21,22,23,24,16,14,11,8,5,4,3,7	2	21	20	10	18	0,1,1,0,0,0,1,0,0,1,0,1,1,0,1,1,0,1,1,1	55	0	0	1	0	3	3	3					1
7	16	13	Wed	GL3	bar0	7	20		20,21,22,23,24,16,14,11,8,5,4,3,7	4	13	12	3	8	0,1,0,1,1,0,1,1,0,1,1,1	66.6667	0	0	1	0	3	3	3					0.477121
7	16	14	Wed	GL3	bar0	7	8	changed starting node	8,5,4,3,7,10	2	5	4	2	2	0,1,1,1	75	0	1	0	0	3	3	3					0.30103
7	16	15	Wed	GL3	bar0	7	17		17,18,17,6,9,7	3	6	5	1.66667	2	0,1,1,1,1	80	0	1	1	1	3	3	3					0.221849
7	16	16	Wed	GL3	bar0	7	22		22,21,20,19,12,9,7	4	7	6	1.5	2	0,1,1,1,1,1	83.3333	0	1	1	0	3	3	3					0.176091
7	16	17	Wed	GL3	bar0	7	4		4,5,8,10,7	2	5	4	2	2	0,1,1,1	75	0	1	1	0	3	3	3					0.30103
7	16	18	Wed	GL3	bar0	7	12	Trial 4 minutes long	12,9,7,3	2	3	2	1	0	1,1	100	1	1	0	0	3	3	3					0
7	16	19	Wed	GL3	bar0	7	24		24,23,22,21,20,19,18,17,6,9,7,3	4	11	10	2.5	6	0,1,0,1,1,0,1,1,1,1	70	0	0	0	0	3	3	3					0.39794
7	16	20	Wed	GL3	bar0	7	21		21,22,15,13,10,7	5	6	5	1	0	1,1,1,1,1	100	1	1	1	0	3	3	3					0
7	16	21	Wed	GL3	bar0	7	8		8,11,14,16,13,15,12,19,20,21,22,15,12,9,7,3	2	15	14	7	12	0,0,1,1,0,1,0,0,0,1,1,1,1,1	57.1429	0	0	0	0	3	3	3					0.845098
7	16	22	Wed	GL3	bar0	7	12		12,19,18,19,20,21,22,15,22,23,24,16,13,10,7,3	2	15	14	7	12	0,0,1,0,0,1,1,0,0,1,1,1,1,1	57.1429	0	0	0	1	3	3	3					0.845098
7	16	23	Wed	GL3	bar0	7	11		11,14,16,24,23,22,15,13,16,24,23,22,21,20,19,18,17,6,9,7	3	20	19	6.33333	16	0,1,0,0,1,1,1,0,0,0,1,0,1,1,0,1,1,1,1	57.8947	0	0	1	0	3	3	3					0.801632
8	16	1	Wed	GL3	bar0	11	9	c	9,6,1,2,3,4,5,8,11	4	9	8	2	4	0,0,1,1,1,1,1,1	75	0	1	1	0	3	3	3					0.30103
8	16	2	Wed	GL3	bar0	11	23	c	23,22,21,20,19,18,17,6,1,2,3,4,5,8,11	4	15	14	3.5	10	0,0,0,1,0,1,1,0,1,1,1,1,1,1	64.2857	0	0	1	0	3	3	3					0.544068
8	16	3	Wed	GL3	bar0	11	12		12,9,6,17,18,19,12,9,7,10,8,11	5	12	11	2.2	6	1,0,0,0,1,1,1,1,1,1,1	72.7273	0	0	1	0	3	3	3					0.342423
8	16	4	Wed	GL3	bar0	11	5		5,8,11	2	3	2	1	0	1,1	100	1	1	1	0	3	3	3					0
8	16	5	Wed	GL3	bar0	11	6	c	6,1,2,3,4,5,8,11	5	8	7	1.4	2	0,1,1,1,1,1,1	85.7143	0	1	1	0	3	3	3					0.146128
8	16	6	Wed	GL3	bar0	11	13		13,10,7,9,6,17,18,19,12,9,7,10,8,11	3	14	13	4.33333	10	1,0,0,0,0,0,1,1,1,1,1,1,1	61.5385	0	0	1	0	3	3	3					0.636822
8	16	7	Wed	GL3	bar0	11	17		17,18,19,12,9,7,3,4,5,8,11	6	11	10	1.66667	4	0,1,1,1,1,0,1,1,1,1	80	0	0	1	0	3	3	3					0.221849
8	16	8	Wed	GL3	bar0	11	10		10,7,3,2,1,6,9,7,10,8,11	2	11	10	5	8	0,0,0,0,1,1,1,1,1,1	60	0	0	1	0	3	3	3					0.69897
8	16	9	Wed	GL3	bar0	11	12		12,19,20,21,22,23,24,16,14,11	5	10	9	1.8	4	0,0,1,1,1,1,1,1,1	77.7778	0	1	1	0	3	3	3					0.255273
8	16	10	Wed	GL3	bar0	11	4		4,5,8,11	3	4	3	1	0	1,1,1	100	1	1	1	0	3	3	3					0
8	16	11	Wed	GL3	bar0	11	23		23,22,15,12,9,6,1,2,3,4,5,8,11	4	13	12	3	8	0,1,0,1,0,0,1,1,1,1,1,1	66.6667	0	0	1	0	3	3	3					0.477121
8	16	12	Wed	GL3	bar0	11	13		13,15,22,23,24,16,14,11	3	8	7	2.33333	4	0,0,1,1,1,1,1	71.4286	0	1	1	0	3	3	3					0.367977
8	16	13	Wed	GL3	bar0	11	5		5,8,11	2	3	2	1	0	1,1	100	1	1	1	0	3	3	3					0
8	16	14	Wed	GL3	bar0	11	9		9,6,17,18,19,12,9,7,3,4,5,8,11	4	13	12	3	8	0,0,0,1,1,1,1,0,1,1,1,1	66.6667	0	0	1	0	3	3	3					0.477121
8	16	15	Wed	GL3	bar0	11	20	fell out of tube onto table seems fine	20,21,22,15,12,9,6,1,2,3,4,5,8,11	7	14	13	1.85714	6	1,1,1,0,1,0,0,1,1,1,1,1,1	76.9231	0	0	1	0	3	3	3					0.268845
8	16	16	Wed	GL3	bar0	11	16		16,13,10,7,9,6,1,2,3,4,5,8,11	2	13	12	6	10	0,1,0,0,0,0,1,1,1,1,1,1	58.3333	0	0	1	0	3	3	3					0.778151
8	16	17	Wed	GL3	bar0	11	9		9,12,15,13,16,14,11	4	7	6	1.5	2	0,1,1,1,1,1	83.3333	0	1	1	0	3	3	3					0.176091
8	16	18	Wed	GL3	bar0	11	22		22,23,24,16,13,10,7,9,6,17,18,19,12,15,13,16,14,11	5	18	17	3.4	12	1,1,1,0,1,0,0,0,0,0,1,1,1,1,1,1,1	64.7059	0	0	1	0	3	3	3					0.531479
8	16	19	Wed	GL3	bar0	11	16	c	16,24,23,22,21,20,19,18,17,6,1,2,3,4,5,8,11	2	17	16	8	14	0,0,0,0,0,1,0,1,1,0,1,1,1,1,1,1	56.25	0	0	1	0	3	3	3					0.90309
8	16	20	Wed	GL3	bar0	11	7	c	7,9,12,19,20,21,22,23,24,16,14,11	3	12	11	3.66667	8	0,0,0,0,1,1,1,1,1,1,1	63.6364	0	0	1	0	3	3	3					0.564271
8	16	21	Wed	GL3	bar0	11	21		21,22,15,13,10,8,11	6	7	6	1	0	1,1,1,1,1,1	100	1	1	1	0	3	3	3					0
8	16	22	Wed	GL3	bar0	11	17	c	17,6,1,2,3,4,5,8,11	6	9	8	1.33333	2	1,0,1,1,1,1,1,1	87.5	0	1	1	0	3	3	3					0.124939
8	16	23	Wed	GL3	bar0	11	5		5,4,3,2,1,6,9,12,15,22,23,22,21,20,21,20,19,18,17,6,9,7,10,8,11	2	25	24	12	22	0,0,0,0,1,1,0,1,0,1,0,0,0,1,0,1,0,1,1,1,1,1,1,1	54.1667	0	0	1	0	3	3	3					1.07918
8	16	24	Wed	GL3	bar0	11	15		15,22,23,24,16,14,11,8	4	7	6	1.5	2	0,1,1,1,1,1	83.3333	0	1	0	0	3	3	3					0.176091
8	16	25	Wed	GL3	bar0	11	6		6,17,18,19,12,9,7,10,8,11	5	10	9	1.8	4	0,0,1,1,1,1,1,1,1	77.7778	0	1	1	0	3	3	3					0.255273
8	16	26	Wed	GL3	bar0	11	13		13,16,24,23,22,15,13,10,8,11	3	10	9	3	6	1,0,0,0,1,1,1,1,1	66.6667	0	0	1	0	3	3	3					0.477121
8	16	27	Wed	GL3	bar0	11	4		4,3,2,1,6,9,7,10,8,11	3	10	9	3	6	0,0,0,1,1,1,1,1,1	66.6667	0	0	1	0	3	3	3					0.477121
8	16	28	Wed	GL3	bar0	11	9		9,7,3,4,5,8,11,14	4	7	6	1.5	2	1,0,1,1,1,1	83.3333	0	1	0	0	3	3	3					0.176091
8	16	29	Wed	GL3	bar0	11	23		23,24,23,22,15,13,10,8,11	4	9	8	2	4	1,0,0,1,1,1,1,1	75	0	0	1	1	3	3	3					0.30103
8	16	30	Wed	GL3	bar0	11	10		10,13,16,14,11	2	5	4	2	2	0,1,1,1	75	0	1	1	0	3	3	3					0.30103
8	16	31	Wed	GL3	bar0	11	12		12,15,13,16,14,16,13,10,8,11,14	5	10	9	1.8	4	1,1,1,1,0,0,1,1,1	77.7778	0	0	0	0	3	3	3					0.255273
8	16	32	Wed	GL3	bar0	11	4		4,5,8,11,14	3	4	3	1	0	1,1,1	100	1	1	0	0	3	3	3					0
8	16	33	Wed	GL3	bar0	11	17		17,18,19,12,15,22,23,24,16,14,11	6	11	10	1.66667	4	0,1,1,1,0,1,1,1,1,1	80	0	0	1	0	3	3	3					0.221849
8	16	34	Wed	GL3	bar0	11	13		13,15,22,23,24,16,14,11	3	8	7	2.33333	4	0,0,1,1,1,1,1	71.4286	0	1	1	0	3	3	3					0.367977
5	17	1	Fri	GL3	bar0	21	17	PROBE	17,18,19,20,21,22	4	5	4	1	0	1,1,1,1	100	1	1	0	0	3	3	4			1		0
5	17	2	Fri	GL3	bar0	21	13		13,16,14,11,8,5,4,3,2,1,6,17,18,19,20,21	3	16	15	5	12	0,0,0,1,0,0,1,0,1,1,1,1,1,1,1	60	0	0	1	0	3	3	4					0.69897
5	17	3	Fri	GL3	bar0	21	5		5,4,3,2,1,6,9,12,19,18,19,20,21	6	13	12	2	6	0,1,0,1,1,1,1,1,0,1,1,1	75	0	0	1	0	3	3	4					0.30103
5	17	4	Fri	GL3	bar0	21	12		12,9,6,1,2,3,7,10,13,15,22,21	3	12	11	3.66667	8	0,0,0,0,1,1,1,1,1,1,1	63.6364	0	0	1	0	3	3	4					0.564271
5	17	5	Fri	GL3	bar0	21	18		18,19,20,21	3	4	3	1	0	1,1,1	100	1	1	1	0	3	3	4					0
5	17	6	Fri	GL3	bar0	21	7		7,3,4,5,8,10,13,15,22,21	5	10	9	1.8	4	0,0,1,1,1,1,1,1,1	77.7778	0	1	1	0	3	3	4					0.255273
5	17	7	Fri	GL3	bar0	21	23		23,24,16,13,10,8,5,4,3,7,9,12,19,20,21	2	15	14	7	12	0,0,1,0,0,0,0,1,1,1,1,1,1,1	57.1429	0	0	1	0	3	3	4					0.845098
5	17	8	Fri	GL3	bar0	21	2		2,1,6,9,12,15,22,21	7	8	7	1	0	1,1,1,1,1,1,1	100	1	1	1	0	3	3	4					0
5	17	9	Fri	GL3	bar0	21	13	PROBE	13,10,8,11,14,16,24,23,22,21,20	3	10	9	3	6	0,0,0,1,1,1,1,1,1	66.6667	0	0	0	0	3	3	4			9		0.477121
5	17	10	Fri	GL3	bar0	21	19		19,18,17,6,9,12,19,20,21	2	9	8	4	6	0,0,0,1,1,1,1,1	62.5	0	0	1	0	3	3	4					0.60206
5	17	11	Fri	GL3	bar0	21	5		5,4,3,2,1,6,9,12,19,20,21	6	11	10	1.66667	4	0,1,0,1,1,1,1,1,1,1	80	0	0	1	0	3	3	4					0.221849
5	17	12	Fri	GL3	bar0	21	6		6,17,18,19,20,21	5	6	5	1	0	1,1,1,1,1	100	1	1	1	0	3	3	4					0
5	17	13	Fri	GL3	bar0	21	24		24,23,22,21	3	4	3	1	0	1,1,1	100	1	1	1	0	3	3	4					0
5	17	14	Fri	GL3	bar0	21	3	C	3,4,5,8,11,14,16,24,23,22,21	6	11	10	1.66667	4	0,1,1,0,1,1,1,1,1,1	80	0	0	1	0	3	3	4					0.221849
5	17	15	Fri	GL3	bar0	21	15	rarely rutn?	15,13,16,24,23,22,21	2	7	6	3	4	0,0,1,1,1,1	66.6667	0	1	1	0	3	3	4					0.477121
5	17	16	Fri	GL3	bar0	21	11		11,14,16,24,23,22,21	6	7	6	1	0	1,1,1,1,1,1	100	1	1	1	0	3	3	4					0
5	17	17	Fri	GL3	bar0	21	17		17,6,9,12,19,20,21,22	4	7	6	1.5	2	0,1,1,1,1,1	83.3333	0	1	0	0	3	3	4					0.176091
5	17	18	Fri	GL3	bar0	21	14		14,11,8,10,7,9,12,19,20,21,22	5	10	9	1.8	4	0,1,1,0,1,1,1,1,1	77.7778	0	0	0	0	3	3	4					0.255273
5	17	19	Fri	GL3	bar0	21	5		5,4,3,7,9,12,19,20,21,22	6	9	8	1.33333	2	0,1,1,1,1,1,1,1	87.5	0	1	0	0	3	3	4					0.124939
5	17	20	Fri	GL3	bar0	21	13		13,16,24,16,14,16,24,23,22,21	3	10	9	3	6	0,1,0,0,1,1,1,1,1	66.6667	0	0	1	1	3	3	4					0.477121
5	17	21	Fri	GL3	bar0	21	18		18,19,20,21,22	3	4	3	1	0	1,1,1	100	1	1	0	0	3	3	4					0
5	17	22	Fri	GL3	bar0	21	15		15,13,16,24,23,22,21,22	2	7	6	3	4	0,0,1,1,1,1	66.6667	0	1	0	0	3	3	4					0.477121
6	17	1	Fri	GL3	bar0	1	5	PROBE	5,8,10,7,3,2,1,6	4	7	6	1.5	2	0,1,1,1,1,1	83.3333	0	1	0	0	3	3	4			1		0.176091
6	17	2	Fri	GL3	bar0	1	9		9,12,15,13,10,7,3,2,1	2	9	8	4	6	0,0,0,1,1,1,1,1	62.5	0	0	1	0	3	3	4					0.60206
6	17	3	Fri	GL3	bar0	1	23		23,22,21,20,19,18,17,6,1	6	9	8	1.33333	2	1,0,1,1,1,1,1,1	87.5	0	1	1	0	3	3	4					0.124939
6	17	4	Fri	GL3	bar0	1	12		12,15,13,10,8,5,4,3,7,10,13,15,22,21,20,19,18,17,6,1	3	20	19	6.33333	16	0,0,1,0,1,1,1,0,0,0,1,0,0,1,1,1,1,1,1	57.8947	0	0	1	0	3	3	4					0.801632
6	17	5	Fri	GL3	bar0	1	3		3,4,5,8,11,14,16,24,23,22,21,20,19,12,9,6,1	2	17	16	8	14	0,0,0,0,0,1,0,1,1,0,1,1,1,1,1,1	56.25	0	0	1	0	3	3	4					0.90309
6	17	6	Fri	GL3	bar0	1	14		14,11,8,5,4,3,2,1	7	8	7	1	0	1,1,1,1,1,1,1	100	1	1	1	0	3	3	4					0
6	17	7	Fri	GL3	bar0	1	9		9,12,19,18,17,6,1	2	7	6	3	4	0,0,1,1,1,1	66.6667	0	1	1	0	3	3	4					0.477121
6	17	8	Fri	GL3	bar0	1	4		4,3,7,9,12,15,13,16,14,11,8,10,7,9,6,1	3	16	15	5	12	1,0,1,0,0,0,0,0,1,1,1,1,1,1,1	60	0	0	1	0	3	3	4					0.69897
6	17	9	Fri	GL3	bar0	1	15	PROBE. I forgot to reattach the outside wall of the node? so the mouse saw the walls, could have spent extra time there because of this novelty. During the probe trial, I crawled to the node and reattached the wall. See the video	15,13,10,8,5,4,3,2,1,6	4	9	8	2	4	0,1,0,1,1,1,1,1	75	0	0	0	0	3	3	4			9		0.30103
6	17	10	Fri	GL3	bar0	1	17		17,6,1	2	3	2	1	0	1,1	100	1	1	1	0	3	3	4					0
6	17	11	Fri	GL3	bar0	1	16	C	16,24,23,22,21,20,19,18,17,6,1	6	11	10	1.66667	4	0,1,1,0,1,1,1,1,1,1	80	0	0	1	0	3	3	4					0.221849
6	17	12	Fri	GL3	bar0	1	7		7,9,12,19,18,17,6,1	3	8	7	2.33333	4	1,0,0,1,1,1,1	71.4286	0	0	1	0	3	3	4					0.367977
6	17	13	Fri	GL3	bar0	1	12		12,15,13,10,7,9,6,1	3	8	7	2.33333	4	0,0,1,1,1,1,1	71.4286	0	1	1	0	3	3	4					0.367977
6	17	14	Fri	GL3	bar0	1	11		11,8,5,4,3,2,1	6	7	6	1	0	1,1,1,1,1,1	100	1	1	1	0	3	3	4					0
6	17	15	Fri	GL3	bar0	1	18		18,17,6,9,12,19,20,21,22,23,24,16,14,11,8,5,4,3,2,1	3	20	19	6.33333	16	1,1,0,0,0,0,0,1,0,0,1,0,1,1,1,1,1,1,1	57.8947	0	0	1	0	3	3	4					0.801632
6	17	16	Fri	GL3	bar0	1	4		4,3,2,1	3	4	3	1	0	1,1,1	100	1	1	1	0	3	3	4					0
6	17	17	Fri	GL3	bar0	1	13		13,15,12,19,20,21,22,15,13,10,7,3,4,3,2,1	5	16	15	3	10	1,1,0,0,0,1,1,0,1,1,1,0,1,1,1	66.6667	0	0	1	0	3	3	4					0.477121
6	17	18	Fri	GL3	bar0	1	17		17,18,17,6,1	2	5	4	2	2	0,1,1,1	75	0	1	1	1	3	3	4					0.30103
6	17	19	Fri	GL3	bar0	1	23		23,24,23,22,15,12,9,6,1	6	9	8	1.33333	2	0,1,1,1,1,1,1,1	87.5	0	1	1	1	3	3	4					0.124939
6	17	20	Fri	GL3	bar0	1	12		12,19,18,17,6,1	3	6	5	1.66667	2	0,1,1,1,1	80	0	1	1	0	3	3	4					0.221849
6	17	21	Fri	GL3	bar0	1	5		5,8,11,8,10,7,3,2,1	4	9	8	2	4	0,0,1,1,1,1,1,1	75	0	1	1	1	3	3	4					0.30103
6	17	22	Fri	GL3	bar0	1	9	C	9,7,3,4,5,8,11,14,16,24,23,22,21,20,19,18,17,6,1	2	19	18	9	16	0,1,0,0,0,0,0,1,0,1,1,0,1,1,1,1,1,1	55.5556	0	0	1	0	3	3	4					0.954243
6	17	23	Fri	GL3	bar0	1	14		14,11,8,5,4,3,2,1	7	8	7	1	0	1,1,1,1,1,1,1	100	1	1	1	0	3	3	4					0
6	17	24	Fri	GL3	bar0	1	17		17,18,19,20,21,22,23,24,16,14,16,24,23,22,21,20,19,18,17,6,1	2	21	20	10	18	0,0,0,0,1,0,0,1,0,1,0,1,1,0,1,1,1,1,1,1	55	0	0	1	0	3	3	4					1
6	17	25	Fri	GL3	bar0	1	10		10,8,11,14,16,24,23,22,15,13,10,7,3,2,1	4	15	14	3.5	10	0,0,0,1,0,1,1,1,0,1,1,1,1,1	64.2857	0	0	1	0	3	3	4					0.544068
6	17	26	Fri	GL3	bar0	1	12		12,19,20,21,22,23,24,16,14,11,8,10,7,9,6,1	3	16	15	5	12	0,0,0,1,0,0,1,0,1,1,1,1,1,1,1	60	0	0	1	0	3	3	4					0.69897
6	17	27	Fri	GL3	bar0	1	4		4,3,2,1,6	3	4	3	1	0	1,1,1	100	1	1	0	0	3	3	4					0
6	17	28	Fri	GL3	bar0	1	24		24,23,22,21,20,19,18,17,6,1,2	7	10	9	1.28571	2	1,1,0,1,1,1,1,1,1	88.8889	0	0	0	0	3	3	4					0.109144
7	17	1	Fri	GL3	bar0	7	24	PROBE	24,23,22,15,13,10,8,5,4,3,7,9	4	11	10	2.5	6	0,1,1,1,1,0,0,1,1,1	70	0	0	0	0	3	3	4			1		0.39794
7	17	2	Fri	GL3	bar0	7	12		12,19,18,17,6,9,7	2	7	6	3	4	0,0,1,1,1,1	66.6667	0	1	1	0	3	3	4					0.477121
7	17	3	Fri	GL3	bar0	7	8		8,11,14,16,24,23,22,15,13,10,7	2	11	10	5	8	0,0,1,0,0,1,1,1,1,1	60	0	0	1	0	3	3	4					0.69897
7	17	4	Fri	GL3	bar0	7	15		15,22,21,20,19,18,17,6,9,7	3	10	9	3	6	0,0,1,1,0,1,1,1,1	66.6667	0	0	1	0	3	3	4					0.477121
7	17	5	Fri	GL3	bar0	7	2		2,3,7	2	3	2	1	0	1,1	100	1	1	1	0	3	3	4					0
7	17	6	Fri	GL3	bar0	7	11		11,14,16,13,15,12,9,7	3	8	7	2.33333	4	0,1,1,0,1,1,1	71.4286	0	0	1	0	3	3	4					0.367977
7	17	7	Fri	GL3	bar0	7	17		17,6,9,7	3	4	3	1	0	1,1,1	100	1	1	1	0	3	3	4					0
7	17	8	Fri	GL3	bar0	7	13		13,15,12,9,7	2	5	4	2	2	0,1,1,1	75	0	1	1	0	3	3	4					0.30103
7	17	9	Fri	GL3	bar0	7	19	PROBE	19,18,17,6,9,7,3	3	6	5	1.66667	2	0,1,1,1,1	80	0	1	0	0	3	3	4			9		0.221849
7	17	10	Fri	GL3	bar0	7	24		24,23,22,15,12,9,7	4	7	6	1.5	2	0,1,1,1,1,1	83.3333	0	1	1	0	3	3	4					0.176091
7	17	11	Fri	GL3	bar0	7	4		4,3,7	2	3	2	1	0	1,1	100	1	1	1	0	3	3	4					0
7	17	12	Fri	GL3	bar0	7	12		12,19,18,17,6,9,7	2	7	6	3	4	0,0,1,1,1,1	66.6667	0	1	1	0	3	3	4					0.477121
7	17	13	Fri	GL3	bar0	7	8		8,11,14,16,13,10,7	2	7	6	3	4	0,0,1,1,1,1	66.6667	0	1	1	0	3	3	4					0.477121
7	17	14	Fri	GL3	bar0	7	20		20,21,22,15,13,10,7	4	7	6	1.5	2	0,1,1,1,1,1	83.3333	0	1	1	0	3	3	4					0.176091
7	17	15	Fri	GL3	bar0	7	13		13,15,12,9,7	2	5	4	2	2	0,1,1,1	75	0	1	1	0	3	3	4					0.30103
7	17	16	Fri	GL3	bar0	7	23		23,22,15,13,10,7	5	6	5	1	0	1,1,1,1,1	100	1	1	1	0	3	3	4					0
7	17	17	Fri	GL3	bar0	7	6		6,9,7	2	3	2	1	0	1,1	100	1	1	1	0	3	3	4					0
7	17	18	Fri	GL3	bar0	7	16		16,14,11,8,5,4,3,7	3	8	7	2.33333	4	0,1,1,0,1,1,1	71.4286	0	0	1	0	3	3	4					0.367977
7	17	19	Fri	GL3	bar0	7	12		12,19,18,17,6,9,7	2	7	6	3	4	0,0,1,1,1,1	66.6667	0	1	1	0	3	3	4					0.477121
7	17	20	Fri	GL3	bar0	7	4		4,5,8,11,14,16,13,10,7	2	9	8	4	6	0,1,0,0,1,1,1,1	62.5	0	0	1	0	3	3	4					0.60206
7	17	21	Fri	GL3	bar0	7	14		14,16,24,23,24,16,13,10,7,3	4	9	8	2	4	1,0,0,1,1,1,1,1	75	0	0	0	0	3	3	4					0.30103
7	17	22	Fri	GL3	bar0	7	17		17,6,9,7	3	4	3	1	0	1,1,1	100	1	1	1	0	3	3	4					0
7	17	23	Fri	GL3	bar0	7	22		22,23,24,16,13,10,7	4	7	6	1.5	2	0,1,1,1,1,1	83.3333	0	1	1	0	3	3	4					0.176091
7	17	24	Fri	GL3	bar0	7	13		13,16,24,23,22,15,12,9,7	2	9	8	4	6	0,0,0,1,1,1,1,1	62.5	0	0	1	0	3	3	4					0.60206
7	17	25	Fri	GL3	bar0	7	2		2,3,7	2	3	2	1	0	1,1	100	1	1	1	0	3	3	4					0
7	17	26	Fri	GL3	bar0	7	15		15,22,21,20,19,12,9,7	3	8	7	2.33333	4	0,0,1,1,1,1,1	71.4286	0	1	1	0	3	3	4					0.367977
7	17	27	Fri	GL3	bar0	7	19		19,20,21,22,23,24,16,14,11,8,5,8,10,7	3	14	13	4.33333	10	0,0,1,0,1,1,0,1,1,0,1,1,1	61.5385	0	0	1	0	3	3	4					0.636822
7	17	28	Fri	GL3	bar0	7	8		8,11,14,11,8,10,7	2	7	6	3	4	0,0,1,1,1,1	66.6667	0	1	1	1	3	3	4					0.477121
7	17	29	Fri	GL3	bar0	7	14		14,16,24,23,22,15,12,9,7	4	9	8	2	4	1,0,0,1,1,1,1,1	75	0	0	1	0	3	3	4					0.30103
7	17	30	Fri	GL3	bar0	7	23		23,24,16,13,10,7	5	6	5	1	0	1,1,1,1,1	100	1	1	1	0	3	3	4					0
7	17	31	Fri	GL3	bar0	7	12		12,15,13,10,8,11,14,16,13,10,7	2	11	10	5	8	0,1,1,0,0,0,1,1,1,1	60	0	0	1	0	3	3	4					0.69897
7	17	32	Fri	GL3	bar0	7	21		21,22,23,24,16,13,10,7,3	5	8	7	1.4	2	1,0,1,1,1,1,1	85.7143	0	1	0	0	3	3	4					0.146128
7	17	33	Fri	GL3	bar0	7	13	IB at 9:30, clearly rearead and looked at the central cue, but then took the wrong paths.	13,15,22,23,24,16,13,10,7,3	2	9	8	4	6	0,0,0,1,1,1,1,1	62.5	0	0	0	0	3	3	4					0.60206
8	17	1	Fri	GL3	bar0	11	24	PROBE	24,23,22,21,20,19,12,9,7,3,4,5,8,11,14	3	14	13	4.33333	10	0,0,0,0,1,1,1,1,0,1,1,1,1	61.5385	0	0	0	0	3	3	4			1		0.636822
8	17	2	Fri	GL3	bar0	11	9	C	9,12,19,20,21,22,23,24,16,14,11	4	11	10	2.5	6	0,0,0,1,1,1,1,1,1,1	70	0	0	1	0	3	3	4					0.39794
8	17	3	Fri	GL3	bar0	11	4		4,3,7,10,8,11	3	6	5	1.66667	2	0,1,1,1,1	80	0	1	1	0	3	3	4					0.221849
8	17	4	Fri	GL3	bar0	11	15		15,12,19,20,21,22,23,24,16,13,10,7,3,4,5,8,11	4	17	16	4	12	0,0,0,1,1,1,1,1,0,1,0,0,1,1,1,1	62.5	0	0	1	0	3	3	4					0.60206
8	17	5	Fri	GL3	bar0	11	6		6,17,18,19,12,9,6,1,2,3,4,5,8,11	5	14	13	2.6	8	0,0,1,1,1,0,0,1,1,1,1,1,1	69.2308	0	0	1	0	3	3	4					0.414973
8	17	6	Fri	GL3	bar0	11	10		10,7,9,12,15,13,16,14,11	2	9	8	4	6	0,0,0,1,1,1,1,1	62.5	0	0	1	0	3	3	4					0.60206
8	17	7	Fri	GL3	bar0	11	19	C	19,20,21,22,23,24,16,14,11	6	9	8	1.33333	2	0,1,1,1,1,1,1,1	87.5	0	1	1	0	3	3	4					0.124939
8	17	8	Fri	GL3	bar0	11	16		16,24,23,22,21,20,19,18,17,6,9,7,10,8,11	2	15	14	7	12	0,0,0,0,0,1,0,1,1,1,1,1,1,1	57.1429	0	0	1	0	3	3	4					0.845098
8	17	9	Fri	GL3	bar0	11	9	PROBE:control 10, 20	9,6,17,18,19,12,9,7,10,8,11,14	4	11	10	2.5	6	0,0,0,1,1,1,1,1,1,1	70	0	0	0	0	3	3	4			9		0.39794
8	17	10	Fri	GL3	bar0	11	21	C	21,20,19,18,17,6,1,2,3,4,5,8,11	6	13	12	2	6	0,1,0,1,1,0,1,1,1,1,1,1	75	0	0	1	0	3	3	4					0.30103
8	17	11	Fri	GL3	bar0	11	5		5,8,11	2	3	2	1	0	1,1	100	1	1	1	0	3	3	4					0
8	17	12	Fri	GL3	bar0	11	6	C	6,1,2,3,4,5,8,11	5	8	7	1.4	2	0,1,1,1,1,1,1	85.7143	0	1	1	0	3	3	4					0.146128
8	17	13	Fri	GL3	bar0	11	15		15,12,9,7,3,4,5,8,11	4	9	8	2	4	0,1,1,0,1,1,1,1	75	0	0	1	0	3	3	4					0.30103
8	17	14	Fri	GL3	bar0	11	24		24,23,22,15,12,9,6,1,2,3,4,5,8,11	3	14	13	4.33333	10	0,0,1,0,1,0,0,1,1,1,1,1,1	61.5385	0	0	1	0	3	3	4					0.636822
8	17	15	Fri	GL3	bar0	11	9		9,6,17,18,19,12,9,7,3,4,5,8,11	4	13	12	3	8	0,0,0,1,1,1,1,0,1,1,1,1	66.6667	0	0	1	0	3	3	4					0.477121
8	17	16	Fri	GL3	bar0	11	4		4,5,8,11	3	4	3	1	0	1,1,1	100	1	1	1	0	3	3	4					0
8	17	17	Fri	GL3	bar0	11	13		13,10,8,11	3	4	3	1	0	1,1,1	100	1	1	1	0	3	3	4					0
8	17	18	Fri	GL3	bar0	11	17		17,6,1,2,3,4,5,8,11	6	9	8	1.33333	2	1,0,1,1,1,1,1,1	87.5	0	1	1	0	3	3	4					0.124939
8	17	19	Fri	GL3	bar0	11	23		23,22,21,20,19,18,17,6,9,7,10,8,11	4	13	12	3	8	0,0,0,1,0,1,1,1,1,1,1,1	66.6667	0	0	1	0	3	3	4					0.477121
8	17	20	Fri	GL3	bar0	11	12		12,9,6,17,18,19,20,21,22,23,24,16,14,11	5	14	13	2.6	8	1,0,0,0,1,0,1,1,1,1,1,1,1	69.2308	0	0	1	0	3	3	4					0.414973
8	17	21	Fri	GL3	bar0	11	4		4,3,7,9,12,19,20,21,22,23,24,16,14,11	3	14	13	4.33333	10	0,1,0,0,0,0,1,1,1,1,1,1,1	61.5385	0	0	1	0	3	3	4					0.636822
8	17	22	Fri	GL3	bar0	11	9		9,6,17,18,19,20,21,22,15,12,15,22,15,12,15,22,15,22,21,20,21,20,21,20,19,12,9,7,10,8,11	4	31	30	7.5	26	0,0,0,1,0,1,1,1,0,1,0,1,0,1,0,1,0,0,0,1,0,1,0,1,1,1,1,1,1,1	56.6667	0	0	1	0	3	3	4					0.875061
8	17	23	Fri	GL3	bar0	11	20		20,21,22,15,13,10,8,11	7	8	7	1	0	1,1,1,1,1,1,1	100	1	1	1	0	3	3	4					0
8	17	24	Fri	GL3	bar0	11	18		18,19,20,19,12,9,7,10,8,11	7	10	9	1.28571	2	1,0,1,1,1,1,1,1,1	88.8889	0	1	1	1	3	3	4					0.109144
8	17	25	Fri	GL3	bar0	11	10		10,13,16,24,23,22,21,20,19,12,9,7,10,8,11	2	15	14	7	12	0,1,0,0,0,0,0,1,1,1,1,1,1,1	57.1429	0	0	1	0	3	3	4					0.845098
8	17	26	Fri	GL3	bar0	11	23		23,22,21,20,19,18,19,20,19,12,15,22,21,20,19,18,17,6,1,2,3,4,5,8,11,14	4	25	24	6	20	0,0,0,1,0,1,0,1,1,1,0,0,0,1,0,1,1,0,1,1,1,1,1,1	58.3333	0	0	0	0	3	3	4					0.778151
8	17	27	Fri	GL3	bar0	11	2		2,3,4,5,8,11	5	6	5	1	0	1,1,1,1,1	100	1	1	1	0	3	3	4					0
8	17	28	Fri	GL3	bar0	11	9		9,6,17,18,19,20,21,22,15,13,10,8,5,8,10,7,9,6,17,18,19,20,21,20,21,22,21,20,19,18,17,6,1,2,3,4,5,8,11,14	4	39	38	9.5	34	0,0,0,1,0,1,1,1,1,1,1,0,1,0,0,0,0,0,0,1,0,1,0,1,1,0,0,1,0,1,1,0,1,1,1,1,1,1	55.2632	0	0	0	0	3	3	4					0.977724
5	18	1	Mon	GL3	bar0	21	10		10,8,5,4,3,7,9,12,19,20,21	4	11	10	2.5	6	0,0,0,1,1,1,1,1,1,1	70	0	0	1	0	3	3	5					0.39794
5	18	2	Mon	GL3	bar0	21	18		18,17,6,9,12,19,20,21	3	8	7	2.33333	4	0,0,1,1,1,1,1	71.4286	0	1	1	0	3	3	5					0.367977
5	18	3	Mon	GL3	bar0	21	2		2,1,6,9,12,15,22,21	7	8	7	1	0	1,1,1,1,1,1,1	100	1	1	1	0	3	3	5					0
5	18	4	Mon	GL3	bar0	21	15		15,13,16,24,23,22,21	2	7	6	3	4	0,0,1,1,1,1	66.6667	0	1	1	0	3	3	5					0.477121
5	18	5	Mon	GL3	bar0	21	5		5,8,10,7,3,4,5,8,11,14,16,24,23,22,21,20	6	15	14	2.33333	8	1,1,0,0,0,1,1,0,1,1,1,1,1,1	71.4286	0	0	0	0	3	3	5					0.367977
5	18	6	Mon	GL3	bar0	21	9	C	9,7,3,4,5,8,11,14,16,24,23,22,21,20	4	13	12	3	8	0,0,0,1,1,0,1,1,1,1,1,1	66.6667	0	0	0	0	3	3	5					0.477121
5	18	7	Mon	GL3	bar0	21	8	C	8,11,14,16,24,23,22,21	5	8	7	1.4	2	0,1,1,1,1,1,1	85.7143	0	1	1	0	3	3	5					0.146128
5	18	8	Mon	GL3	bar0	21	15		15,13,10,8,5,4,3,2,3,4,5,8,10,7,9,12,19,20,21	2	19	18	9	16	0,0,0,0,0,1,0,1,0,1,1,1,0,1,1,1,1,1	55.5556	0	0	1	0	3	3	5					0.954243
5	18	9	Mon	GL3	bar0	21	7		7,9,12,19,20,21	5	6	5	1	0	1,1,1,1,1	100	1	1	1	0	3	3	5					0
5	18	10	Mon	GL3	bar0	21	18		18,19,12,15,22,21	3	6	5	1.66667	2	1,0,1,1,1	80	0	1	1	0	3	3	5					0.221849
5	18	11	Mon	GL3	bar0	21	24		24,23,22,21,20	3	4	3	1	0	1,1,1	100	1	1	0	0	3	3	5					0
5	18	12	Mon	GL3	bar0	21	7		7,10,8,11,14,16,24,23,22,23,24,16,14,11,8,5,4,3,2,1,6,17,18,19,20,21	5	26	25	5	20	1,0,0,1,1,1,1,1,0,0,0,0,0,1,0,0,1,0,1,1,1,1,1,1,1	60	0	0	1	0	3	3	5					0.69897
5	18	13	Mon	GL3	bar0	21	15		15,12,19,20,21	2	5	4	2	2	0,1,1,1	75	0	1	1	0	3	3	5					0.30103
5	18	14	Mon	GL3	bar0	21	3		3,2,1,6,9,12,15,22,21	6	9	8	1.33333	2	0,1,1,1,1,1,1,1	87.5	0	1	1	0	3	3	5					0.124939
5	18	15	Mon	GL3	bar0	21	19		19,20,21	2	3	2	1	0	1,1	100	1	1	1	0	3	3	5					0
5	18	16	Mon	GL3	bar0	21	8		8,11,14,16,13,15,12,19,18,19,12,9,7,10,8,5,4,3,2,1,6,9,12,15,22,21,20	5	26	25	5	20	0,1,1,1,1,0,1,0,1,0,0,0,1,0,0,0,1,0,1,1,1,1,1,1,1	60	0	0	0	0	3	3	5					0.69897
5	18	17	Mon	GL3	bar0	21	12		12,9,6,17,18,19,12,15,22,21	3	10	9	3	6	0,0,1,1,1,0,1,1,1	66.6667	0	0	1	0	3	3	5					0.477121
5	18	18	Mon	GL3	bar0	21	5		5,4,3,2,1,6,9,12,15,22,21	6	11	10	1.66667	4	0,1,0,1,1,1,1,1,1,1	80	0	0	1	0	3	3	5					0.221849
5	18	19	Mon	GL3	bar0	21	13		13,10,8,11,14,16,24,23,22,21	3	10	9	3	6	0,0,0,1,1,1,1,1,1	66.6667	0	0	1	0	3	3	5					0.477121
5	18	20	Mon	GL3	bar0	21	6		6,17,18,19,20,21	5	6	5	1	0	1,1,1,1,1	100	1	1	1	0	3	3	5					0
5	18	21	Mon	GL3	bar0	21	23		23,22,21,22	2	3	2	1	0	1,1	100	1	1	0	0	3	3	5					0
5	18	22	Mon	GL3	bar0	21	18		18,19,20,21	3	4	3	1	0	1,1,1	100	1	1	1	0	3	3	5					0
5	18	23	Mon	GL3	bar0	21	4		4,5,8,10,13,15,12,9,7,3,2,3,7,10,13,15,22,21,22	7	18	17	2.42857	10	1,1,1,1,1,0,0,0,0,0,1,1,1,1,1,1,1	70.5882	0	0	0	0	3	3	5					0.385351
5	18	24	Mon	GL3	bar0	21	15		15,13,16,14,11,8,10,7,3,4,5,8,10,13,16,24,23,22,21,22	2	19	18	9	16	0,0,0,0,1,1,0,0,0,1,1,1,1,0,1,1,1,1	55.5556	0	0	0	0	3	3	5					0.954243
6	18	1	Mon	GL3	bar0	1	15	C	15,13,16,24,23,22,21,20,19,18,17,6,1	4	13	12	3	8	0,0,0,1,1,0,1,1,1,1,1,1	66.6667	0	0	1	0	3	3	5					0.477121
6	18	2	Mon	GL3	bar0	1	4		4,5,8,11,14,16,24,23,22,15,12,9,6,1	3	14	13	4.33333	10	0,0,0,0,1,0,1,1,1,1,1,1,1	61.5385	0	0	1	0	3	3	5					0.636822
6	18	3	Mon	GL3	bar0	1	18		18,19,20,21,22,23,24,16,13,10,7,3,2,1,6	3	14	13	4.33333	10	0,0,0,1,0,0,1,1,1,1,1,1,1	61.5385	0	0	0	0	3	3	5					0.636822
6	18	4	Mon	GL3	bar0	1	10		10,8,5,4,3,2,1,6	4	7	6	1.5	2	0,1,1,1,1,1	83.3333	0	1	0	0	3	3	5					0.176091
6	18	5	Mon	GL3	bar0	1	23		23,22,15,13,10,8,5,4,3,2,1,6	6	11	10	1.66667	4	1,1,0,1,0,1,1,1,1,1	80	0	0	0	0	3	3	5					0.221849
6	18	6	Mon	GL3	bar0	1	9		9,7,3,2,1	2	5	4	2	2	0,1,1,1	75	0	1	1	0	3	3	5					0.30103
6	18	7	Mon	GL3	bar0	1	5		5,8,10,13,15,22,21,20,19,18,17,6,1	4	13	12	3	8	0,1,0,1,0,0,1,1,1,1,1,1	66.6667	0	0	1	0	3	3	5					0.477121
6	18	8	Mon	GL3	bar0	1	13		13,16,24,23,22,21,20,19,18,17,6,1	5	12	11	2.2	6	0,0,1,1,0,1,1,1,1,1,1	72.7273	0	0	1	0	3	3	5					0.342423
6	18	9	Mon	GL3	bar0	1	3		3,7,9,6,1,2	2	5	4	2	2	0,1,1,1	75	0	1	0	0	3	3	5					0.30103
6	18	10	Mon	GL3	bar0	1	12		12,19,18,17,6,1	3	6	5	1.66667	2	0,1,1,1,1	80	0	1	1	0	3	3	5					0.221849
6	18	11	Mon	GL3	bar0	1	8		8,5,4,3,2,1,6	5	6	5	1	0	1,1,1,1,1	100	1	1	0	0	3	3	5					0
6	18	12	Mon	GL3	bar0	1	18		18,19,20,21,22,23,24,16,13,15,22,21,20,19,12,9,6,1	3	18	17	5.66667	14	0,0,0,1,0,0,1,1,1,0,0,1,1,1,1,1,1	58.8235	0	0	1	0	3	3	5					0.753328
6	18	13	Mon	GL3	bar0	1	15		15,22,23,22,15,13,10,8,10,8,11,14,16,13,15,12,19,20,19,12,9,7,10,7,3,2,1	4	27	26	6.5	22	0,0,1,1,0,1,0,1,0,0,0,1,1,1,1,0,0,1,1,1,0,0,1,1,1,1	57.6923	0	0	1	1	3	3	5					0.812913
6	18	14	Mon	GL3	bar0	1	11		11,14,16,13,15,12,9,6,1	6	9	8	1.33333	2	0,1,1,1,1,1,1,1	87.5	0	1	1	0	3	3	5					0.124939
6	18	15	Mon	GL3	bar0	1	17		17,6,1	2	3	2	1	0	1,1	100	1	1	1	0	3	3	5					0
6	18	16	Mon	GL3	bar0	1	15		15,12,9,6,1,2	4	5	4	1	0	1,1,1,1	100	1	1	0	0	3	3	5					0
6	18	17	Mon	GL3	bar0	1	20	C	20,21,22,23,24,16,14,11,8,5,4,3,2,1	5	14	13	2.6	8	0,1,0,0,1,0,1,1,1,1,1,1,1	69.2308	0	0	1	0	3	3	5					0.414973
6	18	18	Mon	GL3	bar0	1	9		9,12,15,13,16,24,23,22,15,12,19,18,17,6,1	2	15	14	7	12	0,0,0,0,0,1,1,1,1,0,1,1,1,1	57.1429	0	0	1	0	3	3	5					0.845098
6	18	19	Mon	GL3	bar0	1	5		5,8,11,14,16,13,15,22,21,20,19,18,17,6,1	4	15	14	3.5	10	0,0,0,1,1,1,0,0,1,1,1,1,1,1	64.2857	0	0	1	0	3	3	5					0.544068
6	18	20	Mon	GL3	bar0	1	12		12,19,20,21,22,15,12,9,6,1	3	10	9	3	6	0,0,0,1,1,1,1,1,1	66.6667	0	0	1	0	3	3	5					0.477121
6	18	21	Mon	GL3	bar0	1	10		10,8,11,14,16,13,10,7,3,2,1	4	11	10	2.5	6	0,0,0,1,1,1,1,1,1,1	70	0	0	1	0	3	3	5					0.39794
6	18	22	Mon	GL3	bar0	1	21		21,20,19,18,17,6,1,2	6	7	6	1	0	1,1,1,1,1,1	100	1	1	0	0	3	3	5					0
7	18	1	Mon	GL3	bar0	7	20		20,19,12,9,7	4	5	4	1	0	1,1,1,1	100	1	1	1	0	3	3	5					0
7	18	2	Mon	GL3	bar0	7	11		11,8,5,4,3,7	3	6	5	1.66667	2	1,0,1,1,1	80	0	1	1	0	3	3	5					0.221849
7	18	3	Mon	GL3	bar0	7	1		1,6,9,7	3	4	3	1	0	1,1,1	100	1	1	1	0	3	3	5					0
7	18	4	Mon	GL3	bar0	7	12		12,15,13,10,7	2	5	4	2	2	0,1,1,1	75	0	1	1	0	3	3	5					0.30103
7	18	5	Mon	GL3	bar0	7	4		4,5,8,10,7,9	2	5	4	2	2	0,1,1,1	75	0	1	0	0	3	3	5					0.30103
7	18	6	Mon	GL3	bar0	7	13		13,10,7	2	3	2	1	0	1,1	100	1	1	1	0	3	3	5					0
7	18	7	Mon	GL3	bar0	7	17		17,18,19,20,21,22,23,24,16,24,23,22,15,12,19,20,21,22,23,24,16,14,11,8,5,4,3,7	3	28	27	9	24	0,1,0,0,1,0,1,1,0,0,1,1,1,0,0,0,1,0,1,1,0,1,1,0,1,1,1	55.5556	0	0	1	0	3	3	5					0.954243
7	18	8	Mon	GL3	bar0	7	15		15,22,21,22,15,13,16,24,23,22,15,22,21,20,21,22,23,22,23,22,15,12,19,20,21,22,23,24,16,14,11,8,5,8,5,4,3,7	3	38	37	12.3333	34	0,0,1,1,1,0,0,0,1,1,0,0,1,0,1,0,1,0,1,1,1,0,0,0,1,0,1,1,0,1,1,0,1,0,1,1,1	54.0541	0	0	1	1	3	3	5					1.09108
7	18	9	Mon	GL3	bar0	7	8		8,5,4,3,7,9	2	5	4	2	2	0,1,1,1	75	0	1	0	0	3	3	5					0.30103
7	18	10	Mon	GL3	bar0	7	20		20,21,22,23,24,16,13,10,7,9	4	9	8	2	4	0,1,0,1,1,1,1,1	75	0	0	0	0	3	3	5					0.30103
7	18	11	Mon	GL3	bar0	7	16		16,14,11,8,10,7	3	6	5	1.66667	2	0,1,1,1,1	80	0	1	1	0	3	3	5					0.221849
7	18	12	Mon	GL3	bar0	7	22		22,23,24,16,24,23,22,15,13,15,22,23,22,21,22,23,24,16,13,15,22,21,20,19,20,21,22,15,13,10,7	4	31	30	7.5	26	0,1,1,0,0,1,1,1,0,0,0,1,0,1,0,1,1,1,0,0,0,1,1,0,0,1,1,1,1,1	56.6667	0	0	1	0	3	3	5					0.875061
7	18	13	Mon	GL3	bar0	7	6		6,1,2,3,7	2	5	4	2	2	0,1,1,1	75	0	1	1	0	3	3	5					0.30103
7	18	14	Mon	GL3	bar0	7	13		13,16,24,23,22,15,13,10,7,3	2	9	8	4	6	0,0,0,1,1,1,1,1	62.5	0	0	0	0	3	3	5					0.60206
7	18	15	Mon	GL3	bar0	7	18		18,17,6,9,7	4	5	4	1	0	1,1,1,1	100	1	1	1	0	3	3	5					0
7	18	16	Mon	GL3	bar0	7	4		4,3,7	2	3	2	1	0	1,1	100	1	1	1	0	3	3	5					0
7	18	17	Mon	GL3	bar0	7	14		14,11,8,5,4,3,7,10	4	7	6	1.5	2	1,1,0,1,1,1	83.3333	0	0	0	0	3	3	5					0.176091
7	18	18	Mon	GL3	bar0	7	12		12,15,22,23,24,16,13,15,22,21,20,19,18,19,12,15,13,10,7,3	2	19	18	9	16	0,0,0,1,1,1,0,0,0,1,1,0,1,1,0,1,1,1	55.5556	0	0	0	0	3	3	5					0.954243
7	18	19	Mon	GL3	bar0	7	24		24,23,22,21,22,23,24,23,22,21,22,23,24,23,22,15,13,10,8,11,8,5,4,3,7	4	25	24	6	20	0,1,0,1,0,1,0,1,0,1,0,1,0,1,1,1,1,0,0,1,0,1,1,1	58.3333	0	0	1	0	3	3	5					0.778151
8	18	1	Mon	GL3	bar0	11	17	C	17,18,19,20,21,22,23,24,16,14,11	6	11	10	1.66667	4	0,1,0,1,1,1,1,1,1,1	80	0	0	1	0	3	3	5					0.221849
8	18	2	Mon	GL3	bar0	11	4	C	4,3,7,9,12,19,20,21,22,23,24,16,14,11	3	14	13	4.33333	10	0,1,0,0,0,0,1,1,1,1,1,1,1	61.5385	0	0	1	0	3	3	5					0.636822
8	18	3	Mon	GL3	bar0	11	15	C	15,12,9,6,1,2,3,4,5,8,11	4	11	10	2.5	6	0,1,0,0,1,1,1,1,1,1	70	0	0	1	0	3	3	5					0.39794
8	18	4	Mon	GL3	bar0	11	6		6,17,18,19,12,15,13,16,14,11	5	10	9	1.8	4	0,0,1,1,1,1,1,1,1	77.7778	0	1	1	0	3	3	5					0.255273
8	18	5	Mon	GL3	bar0	11	10		10,7,9,12,15,13,16,14,11	2	9	8	4	6	0,0,0,1,1,1,1,1	62.5	0	0	1	0	3	3	5					0.60206
8	18	6	Mon	GL3	bar0	11	19		19,20,21,22,15,13,10,8,11	6	9	8	1.33333	2	0,1,1,1,1,1,1,1	87.5	0	1	1	0	3	3	5					0.124939
8	18	7	Mon	GL3	bar0	11	7		7,9,12,19,20,21,22,23,24,16,14,11	3	12	11	3.66667	8	0,0,0,0,1,1,1,1,1,1,1	63.6364	0	0	1	0	3	3	5					0.564271
8	18	8	Mon	GL3	bar0	11	23		23,24,16,14,11	4	5	4	1	0	1,1,1,1	100	1	1	1	0	3	3	5					0
8	18	9	Mon	GL3	bar0	11	12		12,9,7,10,8,11	5	6	5	1	0	1,1,1,1,1	100	1	1	1	0	3	3	5					0
8	18	10	Mon	GL3	bar0	11	5		5,4,3,2,1,6,17,18,19,12,9,7,10,8,11	2	15	14	7	12	0,0,0,0,1,0,0,1,1,1,1,1,1,1	57.1429	0	0	1	0	3	3	5					0.845098
8	18	11	Mon	GL3	bar0	11	9	C	9,6,17,18,19,20,21,22,23,24,16,14,11	4	13	12	3	8	0,0,0,1,0,1,1,1,1,1,1,1	66.6667	0	0	1	0	3	3	5					0.477121
8	18	12	Mon	GL3	bar0	11	13	C	13,10,7,3,2,1,6,17,18,19,20,21,22,23,24,16,14,11	3	18	17	5.66667	14	1,0,0,0,0,1,0,0,1,0,1,1,1,1,1,1,1	58.8235	0	0	1	0	3	3	5					0.753328
8	18	13	Mon	GL3	bar0	11	23		23,22,21,20,19,12,15,13,16,14,11	4	11	10	2.5	6	0,0,0,1,1,1,1,1,1,1	70	0	0	1	0	3	3	5					0.39794
8	18	14	Mon	GL3	bar0	11	7	C	7,9,12,19,20,21,22,23,24,16,14,11	3	12	11	3.66667	8	0,0,0,0,1,1,1,1,1,1,1	63.6364	0	0	1	0	3	3	5					0.564271
8	18	15	Mon	GL3	bar0	11	1		1,6,9,7,10,8,11	6	7	6	1	0	1,1,1,1,1,1	100	1	1	1	0	3	3	5					0
8	18	16	Mon	GL3	bar0	11	10		10,13,15,12,19,20,21,22,23,24,16,14,11	2	13	12	6	10	0,0,0,0,0,1,1,1,1,1,1,1	58.3333	0	0	1	0	3	3	5					0.778151
8	18	17	Mon	GL3	bar0	11	17		17,18,19,20,21,22,23,24,16,14,11	6	11	10	1.66667	4	0,1,0,1,1,1,1,1,1,1	80	0	0	1	0	3	3	5					0.221849
8	18	18	Mon	GL3	bar0	11	15	C	15,12,19,20,21,22,23,24,16,14,11	4	11	10	2.5	6	0,0,0,1,1,1,1,1,1,1	70	0	0	1	0	3	3	5					0.39794
8	18	19	Mon	GL3	bar0	11	4	C?	4,3,7,9,12,19,18,17,6,1,2,3,4,5,8,11	3	16	15	5	12	0,1,0,0,0,0,1,1,0,1,1,1,1,1,1	60	0	0	1	0	3	3	5					0.69897
8	18	20	Mon	GL3	bar0	11	16		16,13,10,7,3,4,5,8,11	2	9	8	4	6	0,1,0,0,1,1,1,1	62.5	0	0	1	0	3	3	5					0.60206
8	18	21	Mon	GL3	bar0	11	20		20,19,12,9,7,3,4,5,8,11	7	10	9	1.28571	2	1,1,1,1,0,1,1,1,1	88.8889	0	0	1	0	3	3	5					0.109144
8	18	22	Mon	GL3	bar0	11	7		7,3,4,5,8,11	3	6	5	1.66667	2	0,1,1,1,1	80	0	1	1	0	3	3	5					0.221849
8	18	23	Mon	GL3	bar0	11	17		17,6,9,7,10,8,11	6	7	6	1	0	1,1,1,1,1,1	100	1	1	1	0	3	3	5					0
8	18	24	Mon	GL3	bar0	11	13		13,15,22,21,20,19,18,17,6,9,7,10,8,11	3	14	13	4.33333	10	0,0,0,0,1,0,1,1,1,1,1,1,1	61.5385	0	0	1	0	3	3	5					0.636822
8	18	25	Mon	GL3	bar0	11	4	C?	4,3,2,1,6,17,18,19,20,21,22,15,13,10,8,11	3	16	15	5	12	0,0,0,1,0,0,1,0,1,1,1,1,1,1,1	60	0	0	1	0	3	3	5					0.69897
8	18	26	Mon	GL3	bar0	11	12		12,9,6,17,18,19,12,15,22,23,24,16,14,11,8	5	14	13	2.6	8	1,0,0,0,1,1,1,0,1,1,1,1,1	69.2308	0	0	0	0	3	3	5					0.414973
8	18	27	Mon	GL3	bar0	11	24		24,23,22,21,20,19,12,9,7,10,8,11	3	12	11	3.66667	8	0,0,0,0,1,1,1,1,1,1,1	63.6364	0	0	1	0	3	3	5					0.564271
8	18	28	Mon	GL3	bar0	11	5		5,8,11,14	2	3	2	1	0	1,1	100	1	1	0	0	3	3	5					0
8	18	29	Mon	GL3	bar0	11	9		9,6,17,18,19,12,9,7,10,8,11	4	11	10	2.5	6	0,0,0,1,1,1,1,1,1,1	70	0	0	1	0	3	3	5					0.39794
8	18	30	Mon	GL3	bar0	11	2		2,3,4,5,8,11,14	5	6	5	1	0	1,1,1,1,1	100	1	1	0	0	3	3	5					0
8	18	31	Mon	GL3	bar0	11	10		10,13,15,22,23,24,16,14,11,8	2	9	8	4	6	0,0,0,1,1,1,1,1	62.5	0	0	0	0	3	3	5					0.60206
5	19	1	Wed	GL4	bar0	8	17		17,6,9,12,15,22,21,20,19,18,17,6,9,12,15,22,21,20,19,12,15,22,23,24,16,13,10,8	5	28	27	5.4	22	1,1,0,1,0,0,0,1,0,1,1,1,0,1,0,0,0,1,1,1,0,0,1,1,1,1,1	59.2593	0	0	1	0	3	4	1					0.732394
5	19	2	Wed	GL4	bar0	8	22		22,23,24,16,14,11,8	4	7	6	1.5	2	0,1,1,1,1,1	83.3333	0	1	1	0	3	4	1					0.176091
5	19	3	Wed	GL4	bar0	8	9		9,7,10,13,15,22,21,20,19,18,17,6,1,2,3,4,5,8	3	18	17	5.66667	14	1,1,0,0,0,0,0,1,0,1,1,0,1,1,1,1,1	58.8235	0	0	1	0	3	4	1					0.753328
5	19	4	Wed	GL4	bar0	8	13		13,16,14,11,8	2	5	4	2	2	0,1,1,1	75	0	1	1	0	3	4	1					0.30103
5	19	5	Wed	GL4	bar0	8	1		1,2,3,4,5,8,10	5	6	5	1	0	1,1,1,1,1	100	1	1	0	0	3	4	1					0
5	19	6	Wed	GL4	bar0	8	15		15,12,9,7,3,4,5,8,11	3	8	7	2.33333	4	0,1,1,0,1,1,1	71.4286	0	0	0	0	3	4	1					0.367977
5	19	7	Wed	GL4	bar0	8	7		7,9,12,19,20,21,22,23,24,16,14,11,8,5	2	13	12	6	10	0,0,0,0,1,1,0,1,1,1,1,1	58.3333	0	0	0	0	3	4	1					0.778151
5	19	8	Wed	GL4	bar0	8	19		19,20,21,22,23,24,16,13,10,8,5	5	10	9	1.8	4	0,1,1,0,1,1,1,1,1	77.7778	0	0	0	0	3	4	1					0.255273
5	19	9	Wed	GL4	bar0	8	14		14,16,24,23,22,15,12,9,6,1,2,3,4,5,8,10	2	15	14	7	12	0,0,0,1,1,0,1,0,0,1,1,1,1,1	57.1429	0	0	0	0	3	4	1					0.845098
5	19	10	Wed	GL4	bar0	8	6		6,1,2,3,4,5,8,10	4	7	6	1.5	2	0,1,1,1,1,1	83.3333	0	1	0	0	3	4	1					0.176091
5	19	11	Wed	GL4	bar0	8	21		21,22,15,13,10,8,5	5	6	5	1	0	1,1,1,1,1	100	1	1	0	0	3	4	1					0
5	19	12	Wed	GL4	bar0	8	12		12,19,18,17,6,1,2,3,7,10,8	4	11	10	2.5	6	0,0,1,1,0,1,1,1,1,1	70	0	0	1	0	3	4	1					0.39794
5	19	13	Wed	GL4	bar0	8	4		4,3,7,10,8,11	2	5	4	2	2	0,1,1,1	75	0	1	0	0	3	4	1					0.30103
5	19	14	Wed	GL4	bar0	8	9		9,12,19,20,21,22,23,24,16,14,11,8,5	3	12	11	3.66667	8	0,0,0,1,1,0,1,1,1,1,1	63.6364	0	0	0	0	3	4	1					0.564271
6	19	1	Wed	GL4	bar0	16	19		19,18,17,6,1,2,3,7,9,12,19,20,21,22,15,13,16	4	17	16	4	12	0,0,1,0,1,1,1,0,1,0,0,1,1,1,1,1	62.5	0	0	1	0	3	4	1					0.60206
6	19	2	Wed	GL4	bar0	16	10		10,7,3,4,5,8,11,14,16	2	9	8	4	6	0,0,0,1,1,1,1,1	62.5	0	0	1	0	3	4	1					0.60206
6	19	3	Wed	GL4	bar0	16	17	IB: circling	17,6,1,2,3,4,5,8,11,14,16	6	11	10	1.66667	4	1,0,1,1,0,1,1,1,1,1	80	0	0	1	0	3	4	1					0.221849
6	19	4	Wed	GL4	bar0	16	11		11,14,16	2	3	2	1	0	1,1	100	1	1	1	0	3	4	1					0
6	19	5	Wed	GL4	bar0	16	2	IB: circling	2,1,6,17,18,19,20,21,22,23,24,16	5	12	11	2.2	6	0,1,0,1,1,0,1,1,1,1,1	72.7273	0	0	1	0	3	4	1					0.342423
6	19	6	Wed	GL4	bar0	16	22		22,23,24,16,13	3	4	3	1	0	1,1,1	100	1	1	0	0	3	4	1					0
6	19	7	Wed	GL4	bar0	16	12		12,9,7,3,4,5,8,11,14,16,24	3	10	9	3	6	0,1,0,0,1,1,1,1,1	66.6667	0	0	0	0	3	4	1					0.477121
6	19	8	Wed	GL4	bar0	16	10		10,7,9,6,1,2,3,7,10,8,11,14,16,24	2	13	12	6	10	0,0,0,0,1,1,1,1,0,1,1,1	58.3333	0	0	0	0	3	4	1					0.778151
6	19	9	Wed	GL4	bar0	16	20		20,19,12,15,22,23,24,16	5	8	7	1.4	2	1,1,1,0,1,1,1	85.7143	0	0	1	0	3	4	1					0.146128
6	19	10	Wed	GL4	bar0	16	3		3,4,5,8,11,14,16,13	4	7	6	1.5	2	0,1,1,1,1,1	83.3333	0	1	0	0	3	4	1					0.176091
6	19	11	Wed	GL4	bar0	16	11		11,14,16	2	3	2	1	0	1,1	100	1	1	1	0	3	4	1					0
6	19	12	Wed	GL4	bar0	16	9		9,7,10,8,11,14,16	4	7	6	1.5	2	1,1,0,1,1,1	83.3333	0	0	1	0	3	4	1					0.176091
6	19	13	Wed	GL4	bar0	16	15		15,12,19,20,21,22,15,13,16	2	9	8	4	6	0,0,0,1,1,1,1,1	62.5	0	0	1	0	3	4	1					0.60206
6	19	14	Wed	GL4	bar0	16	2		2,1,6,17,18,19,20,19,12,9,7,3,4,5,8,11,14,16	5	18	17	3.4	12	0,1,0,1,1,0,1,1,0,1,0,0,1,1,1,1,1	64.7059	0	0	1	0	3	4	1					0.531479
6	19	15	Wed	GL4	bar0	16	9		9,7,10,8,5,4,5,8,11,14,16	4	11	10	2.5	6	1,1,0,0,0,1,1,1,1,1	70	0	0	1	0	3	4	1					0.39794
6	19	16	Wed	GL4	bar0	16	23		23,24,16	2	3	2	1	0	1,1	100	1	1	1	0	3	4	1					0
6	19	17	Wed	GL4	bar0	16	10		10,8,11,14,16	2	5	4	2	2	0,1,1,1	75	0	1	1	0	3	4	1					0.30103
6	19	18	Wed	GL4	bar0	16	17		17,6,1,2,1,6,17,18,19,12,15,13,16	6	13	12	2	6	1,0,1,0,1,0,1,1,1,1,1,1	75	0	0	1	0	3	4	1					0.30103
6	19	19	Wed	GL4	bar0	16	7		7,3,4,5,8,10,13,16	3	8	7	2.33333	4	0,0,1,1,1,1,1	71.4286	0	1	1	0	3	4	1					0.367977
6	19	20	Wed	GL4	bar0	16	19		19,20,21,22,23,24,16	4	7	6	1.5	2	0,1,1,1,1,1	83.3333	0	1	1	0	3	4	1					0.176091
6	19	21	Wed	GL4	bar0	16	5		5,4,3,2,1,6,9,7,10,13,16	4	11	10	2.5	6	0,1,0,0,1,1,1,1,1,1	70	0	0	1	0	3	4	1					0.39794
6	19	22	Wed	GL4	bar0	16	12		12,19,18,17,6,1,2,1,6,9,7,10,13,16,24	3	14	13	4.33333	10	0,0,0,1,0,1,0,1,1,1,1,1,1	61.5385	0	0	0	0	3	4	1					0.636822
6	19	23	Wed	GL4	bar0	16	10		10,7,3,2,1,6,17,6,1,2,1,6,17,18,17,18,19,20,19,12,9,7,3,2,1,6,9,7,10,8,11,14,16	2	33	32	16	30	0,0,0,0,1,0,1,0,1,0,1,0,1,0,1,1,0,1,1,0,1,0,0,0,1,1,1,1,0,1,1,1	53.125	0	0	1	0	3	4	1					1.20412
6	19	24	Wed	GL4	bar0	16	6		6,9,7,10,8,11,14,16	5	8	7	1.4	2	1,1,1,0,1,1,1	85.7143	0	0	1	0	3	4	1					0.146128
6	19	25	Wed	GL4	bar0	16	15		15,22,21,20,19,18,17,6,1,2,3,7,10,13,16	2	15	14	7	12	0,0,0,1,0,0,1,0,1,1,1,1,1,1	57.1429	0	0	1	0	3	4	1					0.845098
6	19	26	Wed	GL4	bar0	16	7		7,9,6,17,18,19,20,21,22,23,22,23,24,16	3	14	13	4.33333	10	0,0,0,1,1,0,1,1,1,0,1,1,1	61.5385	0	0	1	0	3	4	1					0.636822
6	19	27	Wed	GL4	bar0	16	21		21,22,15,13,16	4	5	4	1	0	1,1,1,1	100	1	1	1	0	3	4	1					0
6	19	28	Wed	GL4	bar0	16	11		11,14,16	2	3	2	1	0	1,1	100	1	1	1	0	3	4	1					0
6	19	29	Wed	GL4	bar0	16	2		2,1,6,17,18,19,20,21,22,15,12,19,20,19,12,9,7,10,8,11,14,16	5	22	21	4.2	16	0,1,0,1,1,0,1,1,1,0,0,0,1,1,0,1,1,0,1,1,1	61.9048	0	0	1	0	3	4	1					0.623249
6	19	30	Wed	GL4	bar0	16	9		9,6,17,18,19,12,15,22,23,24,16	4	11	10	2.5	6	0,0,1,1,1,1,0,1,1,1	70	0	0	1	0	3	4	1					0.39794
6	19	31	Wed	GL4	bar0	16	19	IB: circling	19,18,17,6,1,2,3,4,5,8,11,14,16	4	13	12	3	8	0,0,1,0,1,1,0,1,1,1,1,1	66.6667	0	0	1	0	3	4	1					0.477121
6	19	32	Wed	GL4	bar0	16	10		10,8,11,14,16,24	2	5	4	2	2	0,1,1,1	75	0	1	0	0	3	4	1					0.30103
7	19	1	Wed	GL4	bar0	23	11		11,8,5,4,3,7,9,12,19,20,21,22,23	4	13	12	3	8	0,0,0,1,1,1,1,0,1,1,1,1	66.6667	0	0	1	0	3	4	1					0.477121
7	19	2	Wed	GL4	bar0	23	9		9,7,10,8,11,14,16,13,15,12,9,7,3,4,5,8,10,7,9,6,17,18,19,20,21,22,23	4	27	26	6.5	22	0,1,0,1,1,1,0,1,0,0,0,0,0,1,1,1,0,1,0,0,1,1,1,1,1,1	57.6923	0	0	1	0	3	4	1					0.812913
7	19	3	Wed	GL4	bar0	23	16		16,14,11,8,10,13,15,12,9,7,3,4,5,8,10,7,3,7,9,6,17,18,19,20,21,22,23	2	27	26	13	24	0,0,0,1,1,1,0,0,0,0,0,1,1,1,0,0,1,1,0,0,1,1,1,1,1,1	53.8462	0	0	1	0	3	4	1					1.11394
7	19	4	Wed	GL4	bar0	23	1		1,2,3,7,9,12,15,22,23	6	9	8	1.33333	2	0,1,1,1,1,1,1,1	87.5	0	1	1	0	3	4	1					0.124939
7	19	5	Wed	GL4	bar0	23	15		15,13,16,24,23	2	5	4	2	2	0,1,1,1	75	0	1	1	0	3	4	1					0.30103
7	19	6	Wed	GL4	bar0	23	5		5,8,10,13,15,22,23	6	7	6	1	0	1,1,1,1,1,1	100	1	1	1	0	3	4	1					0
7	19	7	Wed	GL4	bar0	23	9		9,6,1,2,3,7,10,8,11,14,16,24,23	4	13	12	3	8	0,0,0,1,1,1,0,1,1,1,1,1	66.6667	0	0	1	0	3	4	1					0.477121
7	19	8	Wed	GL4	bar0	23	21		21,22,23	2	3	2	1	0	1,1	100	1	1	1	0	3	4	1					0
7	19	9	Wed	GL4	bar0	23	1		1,6,9,12,15,22,23	6	7	6	1	0	1,1,1,1,1,1	100	1	1	1	0	3	4	1					0
7	19	10	Wed	GL4	bar0	23	10		10,8,5,4,3,2,1,6,17,18,19,20,21,22,23	4	15	14	3.5	10	0,0,0,1,0,1,1,0,1,1,1,1,1,1	64.2857	0	0	1	0	3	4	1					0.544068
7	19	11	Wed	GL4	bar0	23	20		20,21,22,23,24	3	4	3	1	0	1,1,1	100	1	1	0	0	3	4	1					0
7	19	12	Wed	GL4	bar0	23	13		13,16,24,23	3	4	3	1	0	1,1,1	100	1	1	1	0	3	4	1					0
7	19	13	Wed	GL4	bar0	23	9		9,7,3,4,5,8,10,7,9,12,15,22,23	4	13	12	3	8	0,0,0,1,1,1,0,1,1,1,1,1	66.6667	0	0	1	0	3	4	1					0.477121
7	19	14	Wed	GL4	bar0	23	11		11,14,16,24,23,22	4	5	4	1	0	1,1,1,1	100	1	1	0	0	3	4	1					0
7	19	15	Wed	GL4	bar0	23	12		12,19,20,21,22,23	3	6	5	1.66667	2	0,1,1,1,1	80	0	1	1	0	3	4	1					0.221849
7	19	16	Wed	GL4	bar0	23	3		3,7,10,8,5,4,3,2,1,2,3,7,10,8,11,14,16,24,23	6	19	18	3	12	1,1,0,0,0,1,0,1,0,1,1,1,0,1,1,1,1,1	66.6667	0	0	1	0	3	4	1					0.477121
7	19	17	Wed	GL4	bar0	23	15	trial going on 10 min	15,12,15,13,15,13,15,22,23,22	2	9	8	4	6	0,1,0,1,0,1,1,1	62.5	0	0	0	1	3	4	1					0.60206
7	19	18	Wed	GL4	bar0	23	5		5,4,3,2,1,6,17,18,19,12,15,13,10,8,11,14,16,24,23,22	6	19	18	3	12	0,1,0,1,1,0,1,1,1,1,0,0,0,1,1,1,1,1	66.6667	0	0	0	0	3	4	1					0.477121
8	19	1	Wed	GL4	bar0	15	5		5,8,11,14,16,24,23,22,21,20,19,18,17,6,9,7,10,8,11,14,16,24,23,22,15	4	25	24	6	20	1,0,1,1,0,1,1,0,0,1,0,0,1,1,0,1,0,0,1,1,0,1,1,1	58.3333	0	0	1	0	3	4	1					0.778151
8	19	2	Wed	GL4	bar0	15	9		9,6,17,18,19,20,21,22,23,24,16,14,11,8,10,7,9,12,19,20,21,22,23,24,16,14,11,8,5,4,3,2,1,6,17,18,19,18,17,6,9,12,15	2	43	42	21	40	0,0,1,1,0,1,1,0,0,1,0,0,1,1,0,1,1,0,0,1,1,0,0,1,0,0,1,0,0,1,0,1,1,0,1,1,0,0,1,1,1,1	52.381	0	0	1	0	3	4	1					1.32222
8	19	3	Wed	GL4	bar0	15	23		23,24,16,13,15	2	5	4	2	2	0,1,1,1	75	0	1	1	0	3	4	1					0.30103
8	19	4	Wed	GL4	bar0	15	1		1,6,9,12,15	4	5	4	1	0	1,1,1,1	100	1	1	1	0	3	4	1					0
8	19	5	Wed	GL4	bar0	15	19		19,18,17,6,9,7,10,13,15	2	9	8	4	6	0,0,1,1,0,1,1,1	62.5	0	0	1	0	3	4	1					0.60206
8	19	6	Wed	GL4	bar0	15	3		3,4,5,8,10,13,15	4	7	6	1.5	2	0,1,1,1,1,1	83.3333	0	1	1	0	3	4	1					0.176091
8	19	7	Wed	GL4	bar0	15	14		14,11,8,10,7,9,12,19,20,21,22,23,24,16,14,11,8,5,4,5,8,11,14,16,24,23,22,15	3	28	27	9	24	0,1,1,0,1,1,0,0,1,1,0,0,1,0,0,1,0,0,1,1,0,1,1,0,1,1,1	55.5556	0	0	1	0	3	4	1					0.954243
8	19	8	Wed	GL4	bar0	15	4		4,5,8,10,13,15	5	6	5	1	0	1,1,1,1,1	100	1	1	1	0	3	4	1					0
8	19	9	Wed	GL4	bar0	15	10		10,8,11,14,16,24,23,22,15	2	9	8	4	6	0,0,1,1,0,1,1,1	62.5	0	0	1	0	3	4	1					0.60206
8	19	10	Wed	GL4	bar0	15	21		21,20,19,12,15	2	5	4	2	2	0,1,1,1	75	0	1	1	0	3	4	1					0.30103
8	19	11	Wed	GL4	bar0	15	11		11,14,16,24,16,14,11,8,10,13,15	4	11	10	2.5	6	1,1,0,1,0,0,1,1,1,1	70	0	0	1	0	3	4	1					0.39794
8	19	12	Wed	GL4	bar0	15	1		1,6,17,18,19,12,15	4	7	6	1.5	2	1,0,1,1,1,1	83.3333	0	1	1	0	3	4	1					0.176091
8	19	13	Wed	GL4	bar0	15	19		19,20,21,22,23,24,16,14,11,8,10,13,15	2	13	12	6	10	0,1,1,0,0,1,0,0,1,1,1,1	58.3333	0	0	1	0	3	4	1					0.778151
8	19	14	Wed	GL4	bar0	15	7		7,10,13,15,12	3	4	3	1	0	1,1,1	100	1	1	0	0	3	4	1					0
8	19	15	Wed	GL4	bar0	15	23		23,22,15,13	2	3	2	1	0	1,1	100	1	1	0	0	3	4	1					0
8	19	16	Wed	GL4	bar0	15	18		18,19,20,21,22,15	3	6	5	1.66667	2	1,0,1,1,1	80	0	1	1	0	3	4	1					0.221849
8	19	17	Wed	GL4	bar0	15	10		10,8,11,14,16,24,23,22,15	2	9	8	4	6	0,0,1,1,0,1,1,1	62.5	0	0	1	0	3	4	1					0.60206
8	19	18	Wed	GL4	bar0	15	2		2,3,7,10,13,15	5	6	5	1	0	1,1,1,1,1	100	1	1	1	0	3	4	1					0
8	19	19	Wed	GL4	bar0	15	14		14,16,24,23,22,15	3	6	5	1.66667	2	1,0,1,1,1	80	0	1	1	0	3	4	1					0.221849
8	19	20	Wed	GL4	bar0	15	6		6,17,18,19,12,15,13	3	6	5	1.66667	2	0,1,1,1,1	80	0	1	0	0	3	4	1					0.221849
8	19	21	Wed	GL4	bar0	15	24		24,23,24,16,14,11,8,10,13,15,12	3	10	9	3	6	1,0,1,0,0,1,1,1,1	66.6667	0	0	0	1	3	4	1					0.477121
8	19	22	Wed	GL4	bar0	15	21		21,20,19,12,9,7,10,8,11,14,16,24,23,22,15	2	15	14	7	12	0,1,1,0,0,1,0,0,1,1,0,1,1,1	57.1429	0	0	1	0	3	4	1					0.845098
8	19	23	Wed	GL4	bar0	15	10		10,8,11,14,16,24,23,22,15	2	9	8	4	6	0,0,1,1,0,1,1,1	62.5	0	0	1	0	3	4	1					0.60206
8	19	24	Wed	GL4	bar0	15	2		2,1,6,9,12,19,20,21,22,15,13	5	10	9	1.8	4	1,1,1,1,0,0,1,1,1	77.7778	0	0	0	0	3	4	1					0.255273
8	19	25	Wed	GL4	bar0	15	18		18,19,12,15,22	3	4	3	1	0	1,1,1	100	1	1	0	0	3	4	1					0
8	19	26	Wed	GL4	bar0	15	8		8,11,14,16,24,23,22,15	3	8	7	2.33333	4	0,1,1,0,1,1,1	71.4286	0	0	1	0	3	4	1					0.367977
8	19	27	Wed	GL4	bar0	15	3		3,2,1,6,17,18,19,20,21,22,15,12	4	11	10	2.5	6	0,1,1,0,1,1,0,1,1,1	70	0	0	0	0	3	4	1					0.39794
8	19	28	Wed	GL4	bar0	15	16		16,24,23,22,15	2	5	4	2	2	0,1,1,1	75	0	1	1	0	3	4	1					0.30103
8	19	29	Wed	GL4	bar0	15	9		9,7,10,8,11,14,16,13,15,22	2	9	8	4	6	0,1,0,0,1,1,1,1	62.5	0	0	0	0	3	4	1					0.60206
8	19	30	Wed	GL4	bar0	15	11		11,8,10,7,9,12,15	4	7	6	1.5	2	1,1,0,1,1,1	83.3333	0	0	1	0	3	4	1					0.176091
8	19	31	Wed	GL4	bar0	15	1		1,6,17,18,19,20,21,22,15,13	4	9	8	2	4	1,0,1,1,0,1,1,1	75	0	0	0	0	3	4	1					0.30103
8	19	32	Wed	GL4	bar0	15	21		21,20,19,12,15	2	5	4	2	2	0,1,1,1	75	0	1	1	0	3	4	1					0.30103
8	19	33	Wed	GL4	bar0	15	4		4,5,8,11,14,16,13,15,22	5	8	7	1.4	2	1,1,0,1,1,1,1	85.7143	0	0	0	0	3	4	1					0.146128
5	20	1	Fri	GL4	bar0	8	22	PROBE	22,23,24,16,13,10,7,3,2,1,6,17,18,19,20,21,22,15,13,10,8,5	4	21	20	5	16	0,1,1,1,1,0,0,0,0,1,0,0,1,0,1,1,1,1,1,1	60	0	0	0	0	3	4	2			1		0.69897
5	20	2	Fri	GL4	bar0	8	14		14,16,13,15,22,21,20,19,18,17,6,9,7,3,2,1,6,1,2,3,4,5,8	2	23	22	11	20	0,1,0,0,0,0,1,0,1,1,1,1,0,0,0,1,0,1,1,1,1,1	54.5455	0	0	1	0	3	4	2					1.04139
5	20	3	Fri	GL4	bar0	8	7		7,9,12,15,22,21,20,19,18,17,6,1,2,3,4,5,8	2	17	16	8	14	0,0,1,0,0,0,1,0,1,1,0,1,1,1,1,1	56.25	0	0	1	0	3	4	2					0.90309
5	20	4	Fri	GL4	bar0	8	16		16,24,23,22,21,20,19,12,15,13,10,8	3	12	11	3.66667	8	0,0,1,0,0,1,1,1,1,1,1	63.6364	0	0	1	0	3	4	2					0.564271
5	20	5	Fri	GL4	bar0	8	12		12,19,20,21,22,23,24,16,14,11,8	4	11	10	2.5	6	0,0,1,1,0,1,1,1,1,1	70	0	0	1	0	3	4	2					0.39794
5	20	6	Fri	GL4	bar0	8	4		4,5,8	2	3	2	1	0	1,1	100	1	1	1	0	3	4	2					0
5	20	7	Fri	GL4	bar0	8	6		6,17,18,19,20,21,22,15,13,15,12,9,6,17,6,1,2,3,4,5,8	4	21	20	5	16	0,0,1,0,1,1,1,1,0,0,1,0,0,1,0,1,1,1,1,1	60	0	0	1	0	3	4	2					0.69897
5	20	8	Fri	GL4	bar0	8	13		13,16,24,23,22,21,20,19,18,17,6,1,2,3,7,9,12,15,13,16,24,23,22,15,12,19,20,21,22,23,22,21,20,19,18,17,6,1,2,3,4,5,8,5	2	43	42	21	40	0,0,0,1,0,0,1,0,1,1,0,1,1,1,0,0,1,1,0,0,0,1,1,0,0,0,1,1,0,1,0,0,1,0,1,1,0,1,1,1,1,1	52.381	0	0	0	0	3	4	2					1.32222
5	20	9	Fri	GL4	bar0	8	17	PROBE	17,18,19,12,9,6,17,18,19,20,21,22,15,13,10,8,5	5	16	15	3	10	0,1,1,1,0,0,0,1,0,1,1,1,1,1,1	66.6667	0	0	0	0	3	4	2			9		0.477121
5	20	10	Fri	GL4	bar0	8	16		16,14,16,24,23,22,15,12,9,6,1,2,1,2,3,4,5,8	3	18	17	5.66667	14	1,0,0,0,1,1,0,1,0,0,1,0,1,1,1,1,1	58.8235	0	0	1	1	3	4	2					0.753328
5	20	11	Fri	GL4	bar0	8	21		21,20,19,18,17,6,9,7,10,8	5	10	9	1.8	4	0,1,0,1,1,1,1,1,1	77.7778	0	0	1	0	3	4	2					0.255273
5	20	12	Fri	GL4	bar0	8	7		7,3,4,5,8	2	5	4	2	2	0,1,1,1	75	0	1	1	0	3	4	2					0.30103
5	20	13	Fri	GL4	bar0	8	15		15,12,19,18,19,20,21,22,15,13,10,8	3	12	11	3.66667	8	0,0,0,1,0,1,1,1,1,1,1	63.6364	0	0	1	0	3	4	2					0.564271
5	20	14	Fri	GL4	bar0	8	2		2,3,4,5,8,10	4	5	4	1	0	1,1,1,1	100	1	1	0	0	3	4	2					0
5	20	15	Fri	GL4	bar0	8	22		22,21,20,19,18,17,6,1,2,3,7,10,8,11	4	13	12	3	8	0,0,1,0,1,1,0,1,1,1,1,1	66.6667	0	0	0	0	3	4	2					0.477121
5	20	16	Fri	GL4	bar0	8	14		14,16,13,10,8	2	5	4	2	2	0,1,1,1	75	0	1	1	0	3	4	2					0.30103
5	20	17	Fri	GL4	bar0	8	12		12,19,20,21,22,15,13,16,14,11,8,5	4	11	10	2.5	6	0,0,1,1,1,1,0,1,1,1	70	0	0	0	0	3	4	2					0.39794
6	20	1	Fri	GL4	bar0	16	12	PROBE	12,19,18,17,6,1,2,3,7,10,13,15,22,21,20,19,18,17,6,1,2,3,4,5,8,11,14,16,24	3	28	27	9	24	0,0,0,1,0,1,1,1,1,1,0,0,0,0,1,0,0,1,0,1,1,0,1,1,1,1,1	55.5556	0	0	0	0	3	4	2			1		0.954243
6	20	2	Fri	GL4	bar0	16	7		7,3,2,1,6,9,12,15,22,21,20,19,18,17,6,1,2,3,4,5,8,11,14,16	3	24	23	7.66667	20	0,0,0,1,1,1,1,0,0,0,1,0,0,1,0,1,1,0,1,1,1,1,1	56.5217	0	0	1	0	3	4	2					0.884607
6	20	3	Fri	GL4	bar0	16	11		11,14,16	2	3	2	1	0	1,1	100	1	1	1	0	3	4	2					0
6	20	4	Fri	GL4	bar0	16	9		9,6,1,2,3,4,5,8,11,14,16	4	11	10	2.5	6	0,0,1,1,0,1,1,1,1,1	70	0	0	1	0	3	4	2					0.39794
6	20	5	Fri	GL4	bar0	16	3		3,4,5,8,11,14,16	4	7	6	1.5	2	0,1,1,1,1,1	83.3333	0	1	1	0	3	4	2					0.176091
6	20	6	Fri	GL4	bar0	16	19		19,20,21,22,15,12,9,6,17,18,19,20,21,22,23,24,16	4	17	16	4	12	0,1,1,1,0,0,0,0,1,1,0,1,1,1,1,1	62.5	0	0	1	0	3	4	2					0.60206
6	20	7	Fri	GL4	bar0	16	8	C	8,5,4,3,2,1,6,17,18,19,20,21,22,23,24,16	3	16	15	5	12	0,0,1,0,0,1,0,1,1,0,1,1,1,1,1	60	0	0	1	0	3	4	2					0.69897
6	20	8	Fri	GL4	bar0	16	17		17,6,1,2,3,4,5,8,10,13,16	6	11	10	1.66667	4	1,0,1,1,0,1,1,1,1,1	80	0	0	1	0	3	4	2					0.221849
6	20	9	Fri	GL4	bar0	16	19	PROBE	19,18,17,6,9,7,10,13,16,14	4	9	8	2	4	0,0,1,1,1,1,1,1	75	0	1	0	0	3	4	2			9		0.30103
6	20	10	Fri	GL4	bar0	16	22		22,21,20,19,18,17,6,1,2,3,7,10,13,16	3	14	13	4.33333	10	0,0,1,0,0,1,0,1,1,1,1,1,1	61.5385	0	0	1	0	3	4	2					0.636822
6	20	11	Fri	GL4	bar0	16	10		10,7,9,6,1,2,3,4,5,8,11,14,16	2	13	12	6	10	0,0,0,0,1,1,0,1,1,1,1,1	58.3333	0	0	1	0	3	4	2					0.778151
6	20	12	Fri	GL4	bar0	16	12		12,15,13,16	3	4	3	1	0	1,1,1	100	1	1	1	0	3	4	2					0
6	20	13	Fri	GL4	bar0	16	4		4,5,8,11,14,16	5	6	5	1	0	1,1,1,1,1	100	1	1	1	0	3	4	2					0
6	20	14	Fri	GL4	bar0	16	2		2,1,6,17,18,17,6,1,2,3,7,10,13,16	5	14	13	2.6	8	0,1,0,1,0,1,0,1,1,1,1,1,1	69.2308	0	0	1	0	3	4	2					0.414973
6	20	15	Fri	GL4	bar0	16	23		23,22,15,13,16	2	5	4	2	2	0,1,1,1	75	0	1	1	0	3	4	2					0.30103
6	20	16	Fri	GL4	bar0	16	9		9,7,3,4,5,8,11,14,16	4	9	8	2	4	1,0,0,1,1,1,1,1	75	0	0	1	0	3	4	2					0.30103
6	20	17	Fri	GL4	bar0	16	19		19,18,17,6,1,2,3,7,10,13,16	4	11	10	2.5	6	0,0,1,0,1,1,1,1,1,1	70	0	0	1	0	3	4	2					0.39794
6	20	18	Fri	GL4	bar0	16	2		2,3,7,10,13,16	5	6	5	1	0	1,1,1,1,1	100	1	1	1	0	3	4	2					0
6	20	19	Fri	GL4	bar0	16	5		5,8,11,14,16	4	5	4	1	0	1,1,1,1	100	1	1	1	0	3	4	2					0
6	20	20	Fri	GL4	bar0	16	12		12,19,12,9,6,1,6,9,7,10,13,16,14	3	12	11	3.66667	8	0,1,0,0,0,1,1,1,1,1,1	63.6364	0	0	0	1	3	4	2					0.564271
6	20	21	Fri	GL4	bar0	16	10		10,8,11,14,16	2	5	4	2	2	0,1,1,1	75	0	1	1	0	3	4	2					0.30103
6	20	22	Fri	GL4	bar0	16	17		17,6,1,2,3,4,5,8,11,14,16,24	6	11	10	1.66667	4	1,0,1,1,0,1,1,1,1,1	80	0	0	0	0	3	4	2					0.221849
6	20	23	Fri	GL4	bar0	16	15		15,12,19,18,19,12,15,13,16	2	9	8	4	6	0,0,0,1,1,1,1,1	62.5	0	0	1	0	3	4	2					0.60206
6	20	24	Fri	GL4	bar0	16	7		7,3,2,1,6,17,18,19,12,15,13,16	3	12	11	3.66667	8	0,0,0,1,0,1,1,1,1,1,1	63.6364	0	0	1	0	3	4	2					0.564271
6	20	25	Fri	GL4	bar0	16	20		20,19,18,17,6,9,12,19,20,21,20,19,12,15,13,16,24	5	16	15	3	10	1,0,0,1,1,1,0,0,1,0,1,1,1,1,1	66.6667	0	0	0	0	3	4	2					0.477121
6	20	26	Fri	GL4	bar0	16	3		3,4,5,8,11,14,16,24	4	7	6	1.5	2	0,1,1,1,1,1	83.3333	0	1	0	0	3	4	2					0.176091
7	20	1	Fri	GL4	bar0	23	12	PROBE	12,9,6,1,2,3,7,9,12,15,13,16,24,23,22	3	14	13	4.33333	10	0,0,0,0,1,1,1,1,1,0,1,1,1	61.5385	0	0	0	0	3	4	2			1		0.636822
7	20	2	Fri	GL4	bar0	23	21		21,20,19,12,15,13,16,24,23	2	9	8	4	6	0,0,1,1,0,1,1,1	62.5	0	0	1	0	3	4	2					0.60206
7	20	3	Fri	GL4	bar0	23	7		7,3,4,5,8,10,7,9,6,17,18,19,12,15,13,16,24,23	5	18	17	3.4	12	0,0,1,1,1,0,1,0,0,1,1,1,1,0,1,1,1	64.7059	0	0	1	0	3	4	2					0.531479
7	20	4	Fri	GL4	bar0	23	16		16,13,15,22,23	2	5	4	2	2	0,1,1,1	75	0	1	1	0	3	4	2					0.30103
7	20	5	Fri	GL4	bar0	23	19		19,18,17,6,9,7,10,13,16,24,23	4	11	10	2.5	6	0,0,1,1,0,1,1,1,1,1	70	0	0	1	0	3	4	2					0.39794
7	20	6	Fri	GL4	bar0	23	11		11,14,16,24,23	4	5	4	1	0	1,1,1,1	100	1	1	1	0	3	4	2					0
7	20	7	Fri	GL4	bar0	23	4		4,3,7,10,8,5,4,3,7,10,13,15,22,23	7	14	13	1.85714	6	1,1,1,0,0,0,1,1,1,1,1,1,1	76.9231	0	0	1	0	3	4	2					0.268845
7	20	8	Fri	GL4	bar0	23	15		15,22,23	2	3	2	1	0	1,1	100	1	1	1	0	3	4	2					0
7	20	9	Fri	GL4	bar0	23	14	PROBE	14,16,24,23,22	3	4	3	1	0	1,1,1	100	1	1	0	0	3	4	2			9		0
7	20	10	Fri	GL4	bar0	23	9		9,7,3,2,1,6,9,12,15,13,16,24,23	4	13	12	3	8	0,0,0,1,1,1,1,1,0,1,1,1	66.6667	0	0	1	0	3	4	2					0.477121
7	20	11	Fri	GL4	bar0	23	18		18,19,20,21,22,23	5	6	5	1	0	1,1,1,1,1	100	1	1	1	0	3	4	2					0
7	20	12	Fri	GL4	bar0	23	1		1,2,3,4,5,8,10,7,9,6,1,6,17,18,19,12,15,13,16,24,23	6	21	20	3.33333	14	0,1,0,1,1,1,0,1,0,0,1,0,1,1,1,1,0,1,1,1	65	0	0	1	0	3	4	2					0.522879
7	20	13	Fri	GL4	bar0	23	12		12,9,7,3,2,1,6,17,18,19,20,21,22,23	3	14	13	4.33333	10	0,0,0,0,1,1,0,1,1,1,1,1,1	61.5385	0	0	1	0	3	4	2					0.636822
7	20	14	Fri	GL4	bar0	23	10		10,8,5,4,3,2,1,6,9,12,15,22,23	4	13	12	3	8	0,0,0,1,0,1,1,1,1,1,1,1	66.6667	0	0	1	0	3	4	2					0.477121
7	20	15	Fri	GL4	bar0	23	1		1,6,17,18,19,12,15,22,23	6	9	8	1.33333	2	1,0,1,1,1,1,1,1	87.5	0	1	1	0	3	4	2					0.124939
7	20	16	Fri	GL4	bar0	23	16		16,24,23	2	3	2	1	0	1,1	100	1	1	1	0	3	4	2					0
7	20	17	Fri	GL4	bar0	23	20		20,21,22,23	3	4	3	1	0	1,1,1	100	1	1	1	0	3	4	2					0
7	20	18	Fri	GL4	bar0	23	13		13,10,7,9,6,1,6,9,12,15,22,23	3	12	11	3.66667	8	0,0,1,0,0,1,1,1,1,1,1	63.6364	0	0	1	0	3	4	2					0.564271
7	20	19	Fri	GL4	bar0	23	6		6,9,12,15,22,23	5	6	5	1	0	1,1,1,1,1	100	1	1	1	0	3	4	2					0
7	20	20	Fri	GL4	bar0	23	11		11,8,10,7,9,12,19,18,17,6,1,2,3,7,10,8,5,4,5,8,11,14,16,24,23	4	25	24	6	20	0,1,0,1,1,0,0,0,1,0,0,1,1,1,0,0,0,1,1,1,1,1,1,1	58.3333	0	0	1	0	3	4	2					0.778151
7	20	21	Fri	GL4	bar0	23	7		7,3,4,5,8,11,8,10,13,16,14,16,24,23,22	5	14	13	2.6	8	0,0,1,1,1,0,1,1,1,0,1,1,1	69.2308	0	0	0	0	3	4	2					0.414973
8	20	1	Fri	GL4	bar0	15	1	PROBE	1,6,17,18,19,20,21,22,15,13	4	9	8	2	4	1,0,1,1,0,1,1,1	75	0	0	0	0	3	4	2			1		0.30103
8	20	2	Fri	GL4	bar0	15	16		16,24,23,22,15	2	5	4	2	2	0,1,1,1	75	0	1	1	0	3	4	2					0.30103
8	20	3	Fri	GL4	bar0	15	7		7,10,13,16,24,23,22,15	3	8	7	2.33333	4	1,1,0,0,1,1,1	71.4286	0	0	1	0	3	4	2					0.367977
8	20	4	Fri	GL4	bar0	15	19		19,18,17,6,9,12,15	2	7	6	3	4	0,0,1,1,1,1	66.6667	0	1	1	0	3	4	2					0.477121
8	20	5	Fri	GL4	bar0	15	10		10,8,11,14,16,24,23,22,15	2	9	8	4	6	0,0,1,1,0,1,1,1	62.5	0	0	1	0	3	4	2					0.60206
8	20	6	Fri	GL4	bar0	15	6		6,17,18,19,20,21,22,15	3	8	7	2.33333	4	0,1,1,0,1,1,1	71.4286	0	0	1	0	3	4	2					0.367977
8	20	7	Fri	GL4	bar0	15	11		11,14,16,13,15	4	5	4	1	0	1,1,1,1	100	1	1	1	0	3	4	2					0
8	20	8	Fri	GL4	bar0	15	9		9,6,17,18,19,12,15	2	7	6	3	4	0,0,1,1,1,1	66.6667	0	1	1	0	3	4	2					0.477121
8	20	9	Fri	GL4	bar0	15	5	PROBE	5,8,11,14,16,24,23,22,15,12	4	9	8	2	4	1,0,1,1,0,1,1,1	75	0	0	0	0	3	4	2			9		0.30103
8	20	10	Fri	GL4	bar0	15	23		23,22,15	2	3	2	1	0	1,1	100	1	1	1	0	3	4	2					0
8	20	11	Fri	GL4	bar0	15	4		4,5,8,11,14,16,24,23,22,15	5	10	9	1.8	4	1,1,0,1,1,0,1,1,1	77.7778	0	0	1	0	3	4	2					0.255273
8	20	12	Fri	GL4	bar0	15	18		18,19,20,21,22,15	3	6	5	1.66667	2	1,0,1,1,1	80	0	1	1	0	3	4	2					0.221849
8	20	13	Fri	GL4	bar0	15	8		8,11,14,16,24,23,22,15	3	8	7	2.33333	4	0,1,1,0,1,1,1	71.4286	0	0	1	0	3	4	2					0.367977
8	20	14	Fri	GL4	bar0	15	2		2,3,7,9,12,15	5	6	5	1	0	1,1,1,1,1	100	1	1	1	0	3	4	2					0
8	20	15	Fri	GL4	bar0	15	21		21,20,19,12,15	2	5	4	2	2	0,1,1,1	75	0	1	1	0	3	4	2					0.30103
8	20	16	Fri	GL4	bar0	15	10		10,8,5,4,3,7,9,12,15	2	9	8	4	6	0,0,0,1,1,1,1,1	62.5	0	0	1	0	3	4	2					0.60206
8	20	17	Fri	GL4	bar0	15	17		17,18,19,12,15	4	5	4	1	0	1,1,1,1	100	1	1	1	0	3	4	2					0
8	20	18	Fri	GL4	bar0	15	23		23,22,21,20,19,12,9,7,10,8,11,14,16,24,23,22,15	2	17	16	8	14	1,0,0,1,1,0,0,1,0,0,1,1,0,1,1,1	56.25	0	0	1	0	3	4	2					0.90309
8	20	19	Fri	GL4	bar0	15	5	IB at 17, sharp turn	5,4,3,7,9,12,19,12,15	4	9	8	2	4	0,1,1,1,1,0,1,1	75	0	0	1	0	3	4	2					0.30103
8	20	20	Fri	GL4	bar0	15	7		7,9,12,15	3	4	3	1	0	1,1,1	100	1	1	1	0	3	4	2					0
8	20	21	Fri	GL4	bar0	15	16		16,24,23,22,15	2	5	4	2	2	0,1,1,1	75	0	1	1	0	3	4	2					0.30103
8	20	22	Fri	GL4	bar0	15	1	C?	1,2,3,4,5,8,11,14,16,24,23,22,21,20,19,12,15	4	17	16	4	12	0,1,0,1,1,0,1,1,0,1,1,0,0,1,1,1	62.5	0	0	1	0	3	4	2					0.60206
8	20	23	Fri	GL4	bar0	15	11		11,14,16,24,23,22,15	4	7	6	1.5	2	1,1,0,1,1,1	83.3333	0	0	1	0	3	4	2					0.176091
8	20	24	Fri	GL4	bar0	15	19		19,18,17,6,9,12,15	2	7	6	3	4	0,0,1,1,1,1	66.6667	0	1	1	0	3	4	2					0.477121
8	20	25	Fri	GL4	bar0	15	14		14,16,24,23,22,15	3	6	5	1.66667	2	1,0,1,1,1	80	0	1	1	0	3	4	2					0.221849
8	20	26	Fri	GL4	bar0	15	3		3,4,5,8,10,13,15,12	4	7	6	1.5	2	0,1,1,1,1,1	83.3333	0	1	0	0	3	4	2					0.176091
8	20	27	Fri	GL4	bar0	15	21		21,20,19,12,15	2	5	4	2	2	0,1,1,1	75	0	1	1	0	3	4	2					0.30103
8	20	28	Fri	GL4	bar0	15	5		5,4,3,7,9,12,15,22	4	7	6	1.5	2	0,1,1,1,1,1	83.3333	0	1	0	0	3	4	2					0.176091
8	20	29	Fri	GL4	bar0	15	7		7,10,8,11,14,16,13,15,22	3	8	7	2.33333	4	1,0,0,1,1,1,1	71.4286	0	0	0	0	3	4	2					0.367977
8	20	30	Fri	GL4	bar0	15	19		19,18,17,6,9,12,15,22	2	7	6	3	4	0,0,1,1,1,1	66.6667	0	1	0	0	3	4	2					0.477121
8	20	31	Fri	GL4	bar0	15	10		10,8,11,14,16,24,23,22,15	2	9	8	4	6	0,0,1,1,0,1,1,1	62.5	0	0	1	0	3	4	2					0.60206
8	20	32	Fri	GL4	bar0	15	1		1,2,3,7,10,13,16,24,23,22,15	4	11	10	2.5	6	0,1,1,1,1,0,0,1,1,1	70	0	0	1	0	3	4	2					0.39794
8	20	33	Fri	GL4	bar0	15	11		11,14,16,24,23,22,15,12	4	7	6	1.5	2	1,1,0,1,1,1	83.3333	0	0	0	0	3	4	2					0.176091
8	20	34	Fri	GL4	bar0	15	21		21,22,15,13	2	3	2	1	0	1,1	100	1	1	0	0	3	4	2					0
5	21	1	Mon	GL4	bar0	8	14	C	14,16,24,23,22,21,20,19,18,17,6,1,2,3,4,5,8	2	17	16	8	14	0,0,0,1,0,0,1,0,1,1,0,1,1,1,1,1	56.25	0	0	1	0	3	4	3					0.90309
5	21	2	Mon	GL4	bar0	8	9		9,12,15,22,23,24,16,13,10,8	3	10	9	3	6	0,1,0,0,1,1,1,1,1	66.6667	0	0	1	0	3	4	3					0.477121
5	21	3	Mon	GL4	bar0	8	13		13,15,22,21,20,19,18,17,6,1,2,3,7,10,8,11	2	15	14	7	12	0,0,0,0,1,0,1,1,0,1,1,1,1,1	57.1429	0	0	0	0	3	4	3					0.845098
5	21	4	Mon	GL4	bar0	8	1		1,6,17,18,19,20,21,22,23,24,16,14,11,8,5	5	14	13	2.6	8	1,0,0,1,0,1,1,0,1,1,1,1,1	69.2308	0	0	0	0	3	4	3					0.414973
5	21	5	Mon	GL4	bar0	8	15		15,22,21,20,19,12,15,22,23,24,16,14,11,8,5	3	14	13	4.33333	10	0,0,0,1,1,1,0,0,1,1,1,1,1	61.5385	0	0	0	0	3	4	3					0.636822
5	21	6	Mon	GL4	bar0	8	4		4,5,8,10	2	3	2	1	0	1,1	100	1	1	0	0	3	4	3					0
5	21	7	Mon	GL4	bar0	8	12		12,9,6,1,2,3,4,5,8,10	4	9	8	2	4	1,0,0,1,1,1,1,1	75	0	0	0	0	3	4	3					0.30103
5	21	8	Mon	GL4	bar0	8	17		17,18,19,20,21,22,23,24,16,14,11,8,5	5	12	11	2.2	6	0,1,0,1,1,0,1,1,1,1,1	72.7273	0	0	0	0	3	4	3					0.342423
5	21	9	Mon	GL4	bar0	8	16		16,24,23,22,15,13,10,8	3	8	7	2.33333	4	0,0,1,1,1,1,1	71.4286	0	1	1	0	3	4	3					0.367977
5	21	10	Mon	GL4	bar0	8	9		9,12,15,22,23,24,16,14,11,8,5	3	10	9	3	6	0,1,0,0,1,1,1,1,1	66.6667	0	0	0	0	3	4	3					0.477121
5	21	11	Mon	GL4	bar0	8	13		13,16,14,16,13,10,8	2	7	6	3	4	0,1,0,1,1,1	66.6667	0	0	1	1	3	4	3					0.477121
5	21	12	Mon	GL4	bar0	8	4		4,5,8	2	3	2	1	0	1,1	100	1	1	1	0	3	4	3					0
5	21	13	Mon	GL4	bar0	8	15		15,22,21,20,19,12,9,6,9,7,10,8,11	3	12	11	3.66667	8	0,0,0,1,1,1,0,1,1,1,1	63.6364	0	0	0	0	3	4	3					0.564271
6	21	1	Mon	GL4	bar0	16	23	C	23,22,21,20,19,18,17,6,1,2,3,4,5,8,11,14,16	2	17	16	8	14	0,0,0,1,0,0,1,0,1,1,0,1,1,1,1,1	56.25	0	0	1	0	3	4	3					0.90309
6	21	2	Mon	GL4	bar0	16	8		8,5,4,3,2,1,6,17,18,17,6,1,6,17,18,19,12,15,13,16	3	20	19	6.33333	16	0,0,1,0,0,1,0,1,0,1,0,1,0,1,1,1,1,1,1	57.8947	0	0	1	0	3	4	3					0.801632
6	21	3	Mon	GL4	bar0	16	2		2,3,7,10,13,16	5	6	5	1	0	1,1,1,1,1	100	1	1	1	0	3	4	3					0
6	21	4	Mon	GL4	bar0	16	15		15,13,16	2	3	2	1	0	1,1	100	1	1	1	0	3	4	3					0
6	21	5	Mon	GL4	bar0	16	4		4,5,8,10,13,15,12,9,6,1,2,3,4,5,8,11,14,16	5	18	17	3.4	12	1,1,1,1,0,0,0,0,0,1,1,0,1,1,1,1,1	64.7059	0	0	1	0	3	4	3					0.531479
6	21	6	Mon	GL4	bar0	16	18		18,17,6,1,2,3,7,10,13,16	5	10	9	1.8	4	0,1,0,1,1,1,1,1,1	77.7778	0	0	1	0	3	4	3					0.255273
6	21	7	Mon	GL4	bar0	16	11		11,14,16,13	2	3	2	1	0	1,1	100	1	1	0	0	3	4	3					0
6	21	8	Mon	GL4	bar0	16	6		6,1,2,3,4,5,8,11,14,16	5	10	9	1.8	4	0,1,1,0,1,1,1,1,1	77.7778	0	0	1	0	3	4	3					0.255273
6	21	9	Mon	GL4	bar0	16	10		10,8,5,4,3,2,1,6,17,18,19,20,21,22,23,24,16	2	17	16	8	14	0,0,0,1,0,0,1,0,1,1,0,1,1,1,1,1	56.25	0	0	1	0	3	4	3					0.90309
6	21	10	Mon	GL4	bar0	16	2		2,3,7,10,13,16	5	6	5	1	0	1,1,1,1,1	100	1	1	1	0	3	4	3					0
6	21	11	Mon	GL4	bar0	16	12		12,9,7,10,8,11,14,16,13	3	8	7	2.33333	4	0,1,1,0,1,1,1	71.4286	0	0	0	0	3	4	3					0.367977
6	21	12	Mon	GL4	bar0	16	8		8,10,7,3,2,1,6,17,18,19,20,21,22,15,13,16	3	16	15	5	12	1,0,0,0,0,1,0,1,1,0,1,1,1,1,1	60	0	0	1	0	3	4	3					0.69897
6	21	13	Mon	GL4	bar0	16	22		22,21,20,19,18,17,6,1,2,3,4,5,8,11,14,16	3	16	15	5	12	0,0,1,0,0,1,0,1,1,0,1,1,1,1,1	60	0	0	1	0	3	4	3					0.69897
6	21	14	Mon	GL4	bar0	16	7		7,3,4,3,2,1,6,9,7,10,8,11,14,16	3	14	13	4.33333	10	0,0,1,0,0,1,1,1,1,0,1,1,1	61.5385	0	0	1	1	3	4	3					0.636822
6	21	15	Mon	GL4	bar0	16	15		15,22,21,20,21,22,23,24,16,14	2	9	8	4	6	0,0,0,1,1,1,1,1	62.5	0	0	0	0	3	4	3					0.60206
6	21	16	Mon	GL4	bar0	16	4		4,5,8,11,14,16	5	6	5	1	0	1,1,1,1,1	100	1	1	1	0	3	4	3					0
6	21	17	Mon	GL4	bar0	16	19		19,20,21,22,23,24,16,13	4	7	6	1.5	2	0,1,1,1,1,1	83.3333	0	1	0	0	3	4	3					0.176091
6	21	18	Mon	GL4	bar0	16	7		7,3,4,5,8,10,13,16	3	8	7	2.33333	4	0,0,1,1,1,1,1	71.4286	0	1	1	0	3	4	3					0.367977
6	21	19	Mon	GL4	bar0	16	11		11,14,16	2	3	2	1	0	1,1	100	1	1	1	0	3	4	3					0
6	21	20	Mon	GL4	bar0	16	6		6,1,2,3,7,10,13,16	5	8	7	1.4	2	0,1,1,1,1,1,1	85.7143	0	1	1	0	3	4	3					0.146128
6	21	21	Mon	GL4	bar0	16	15		15,12,19,12,15,13,16	2	7	6	3	4	0,0,1,1,1,1	66.6667	0	1	1	1	3	4	3					0.477121
6	21	22	Mon	GL4	bar0	16	2		2,1,6,9,12,19,20,19,12,15,13,16	5	12	11	2.2	6	0,1,1,1,0,0,1,1,1,1,1	72.7273	0	0	1	0	3	4	3					0.342423
6	21	23	Mon	GL4	bar0	16	9		9,6,1,2,3,7,10,13,16,24	4	9	8	2	4	0,0,1,1,1,1,1,1	75	0	1	0	0	3	4	3					0.30103
6	21	24	Mon	GL4	bar0	16	23		23,24,16,14	2	3	2	1	0	1,1	100	1	1	0	0	3	4	3					0
6	21	25	Mon	GL4	bar0	16	3		3,4,5,8,10,13,16	4	7	6	1.5	2	0,1,1,1,1,1	83.3333	0	1	1	0	3	4	3					0.176091
7	21	1	Mon	GL4	bar0	23	1		1,2,3,7,9,6,17,18,19,20,21,22,23	6	13	12	2	6	0,1,1,1,0,0,1,1,1,1,1,1	75	0	0	1	0	3	4	3					0.30103
7	21	2	Mon	GL4	bar0	23	14		14,11,8,10,13,15,22,23	3	8	7	2.33333	4	0,0,1,1,1,1,1	71.4286	0	1	1	0	3	4	3					0.367977
7	21	3	Mon	GL4	bar0	23	12		12,19,20,21,22,23	3	6	5	1.66667	2	0,1,1,1,1	80	0	1	1	0	3	4	3					0.221849
7	21	4	Mon	GL4	bar0	23	10		10,7,9,12,15,22,23	4	7	6	1.5	2	0,1,1,1,1,1	83.3333	0	1	1	0	3	4	3					0.176091
7	21	5	Mon	GL4	bar0	23	20		20,19,18,17,6,1,2,3,4,5,8,11,14,16,24,23	3	16	15	5	12	0,0,0,1,0,0,1,0,1,1,1,1,1,1,1	60	0	0	1	0	3	4	3					0.69897
7	21	6	Mon	GL4	bar0	23	16		16,13,15,22,23	2	5	4	2	2	0,1,1,1	75	0	1	1	0	3	4	3					0.30103
7	21	7	Mon	GL4	bar0	23	7		7,3,2,1,2,3,7,10,13,16,24,23	5	12	11	2.2	6	0,0,1,0,1,1,1,1,1,1,1	72.7273	0	0	1	0	3	4	3					0.342423
7	21	8	Mon	GL4	bar0	23	1		1,2,3,4,5,8,11,14,16,24,23,22	6	11	10	1.66667	4	0,1,0,1,1,1,1,1,1,1	80	0	0	0	0	3	4	3					0.221849
7	21	9	Mon	GL4	bar0	23	11		11,8,10,13,15,22,23	4	7	6	1.5	2	0,1,1,1,1,1	83.3333	0	1	1	0	3	4	3					0.176091
7	21	10	Mon	GL4	bar0	23	9		9,7,10,8,5,8,11,14,16,13,15,12,19,20,21,20,21,22,23	4	19	18	4.5	14	0,1,0,0,1,1,1,1,0,1,0,0,1,1,0,1,1,1	61.1111	0	0	1	0	3	4	3					0.653213
7	21	11	Mon	GL4	bar0	23	15		15,12,19,20,21,22,23	2	7	6	3	4	0,0,1,1,1,1	66.6667	0	1	1	0	3	4	3					0.477121
7	21	12	Mon	GL4	bar0	23	3		3,2,1,6,9,12,15,22,23,24	6	9	8	1.33333	2	0,1,1,1,1,1,1,1	87.5	0	1	0	0	3	4	3					0.124939
7	21	13	Mon	GL4	bar0	23	12		12,9,6,1,2,1,6,9,12,15,22,23	3	12	11	3.66667	8	0,0,0,0,1,1,1,1,1,1,1	63.6364	0	0	1	0	3	4	3					0.564271
7	21	14	Mon	GL4	bar0	23	14		14,11,8,10,13,16,24,23,24	3	8	7	2.33333	4	0,0,1,1,1,1,1	71.4286	0	1	0	0	3	4	3					0.367977
7	21	15	Mon	GL4	bar0	23	7		7,10,13,15,22,23	5	6	5	1	0	1,1,1,1,1	100	1	1	1	0	3	4	3					0
7	21	16	Mon	GL4	bar0	23	21		21,20,19,18,17,6,1,2,3,4,5,8,11,14,11,14,11,8,10,7,3,2,1,6,9,12,19,20,21,20,21,22,23,24	2	33	32	16	30	0,0,0,0,1,0,0,1,0,1,1,1,1,0,1,0,0,1,0,0,0,1,1,1,1,0,1,1,0,1,1,1	53.125	0	0	0	0	3	4	3					1.20412
7	21	17	Mon	GL4	bar0	23	2		2,3,4,5,8,10,13,15,22,21,20,21,22,23	7	14	13	1.85714	6	1,0,1,1,1,1,1,1,0,0,1,1,1	76.9231	0	0	1	0	3	4	3					0.268845
7	21	18	Mon	GL4	bar0	23	15		15,13,10,7,3,4,5,8,10,7,9,6,17,18,17,6,1,2,3,7,9,6,17,18,19,20,21,22,23,22	2	29	28	14	26	0,0,0,0,0,1,1,1,0,1,0,0,1,0,1,0,0,1,1,1,0,0,1,1,1,1,1,1	53.5714	0	0	0	0	3	4	3					1.14613
7	21	19	Mon	GL4	bar0	23	14		14,16,13,15,12,9,7,10,8,5,8,11,14,16,24,23,22	3	16	15	5	12	1,0,1,0,0,0,1,0,0,1,1,1,1,1,1	60	0	0	0	0	3	4	3					0.69897
8	21	1	Mon	GL4	bar0	15	14		14,16,13,15	3	4	3	1	0	1,1,1	100	1	1	1	0	3	4	3					0
8	21	2	Mon	GL4	bar0	15	6		6,1,2,3,7,10,13,15	3	8	7	2.33333	4	0,0,1,1,1,1,1	71.4286	0	1	1	0	3	4	3					0.367977
8	21	3	Mon	GL4	bar0	15	4		4,5,8,11,14,16,13,15	5	8	7	1.4	2	1,1,0,1,1,1,1	85.7143	0	0	1	0	3	4	3					0.146128
8	21	4	Mon	GL4	bar0	15	19		19,18,17,6,9,12,15	2	7	6	3	4	0,0,1,1,1,1	66.6667	0	1	1	0	3	4	3					0.477121
8	21	5	Mon	GL4	bar0	15	5		5,8,10,13,15	4	5	4	1	0	1,1,1,1	100	1	1	1	0	3	4	3					0
8	21	6	Mon	GL4	bar0	15	20		20,19,12,9,6,1,2,3,7,10,13,15	3	12	11	3.66667	8	1,1,0,0,0,0,1,1,1,1,1	63.6364	0	0	1	0	3	4	3					0.564271
8	21	7	Mon	GL4	bar0	15	6		6,17,18,19,20,21,22,15	3	8	7	2.33333	4	0,1,1,0,1,1,1	71.4286	0	0	1	0	3	4	3					0.367977
8	21	8	Mon	GL4	bar0	15	8		8,11,14,16,24,23,22,15	3	8	7	2.33333	4	0,1,1,0,1,1,1	71.4286	0	0	1	0	3	4	3					0.367977
8	21	9	Mon	GL4	bar0	15	24		24,23,22,15	3	4	3	1	0	1,1,1	100	1	1	1	0	3	4	3					0
8	21	10	Mon	GL4	bar0	15	1		1,6,9,12,15	4	5	4	1	0	1,1,1,1	100	1	1	1	0	3	4	3					0
8	21	11	Mon	GL4	bar0	15	10		10,8,5,8,11,14,16,24,23,22,15	2	11	10	5	8	0,0,1,0,1,1,0,1,1,1	60	0	0	1	1	3	4	3					0.69897
8	21	12	Mon	GL4	bar0	15	21		21,22,23,24,16,13,15,12	2	7	6	3	4	1,0,0,1,1,1	66.6667	0	0	0	0	3	4	3					0.477121
8	21	13	Mon	GL4	bar0	15	3		3,4,5,8,11,14,16,13,15,22	4	9	8	2	4	0,1,1,0,1,1,1,1	75	0	0	0	0	3	4	3					0.30103
8	21	14	Mon	GL4	bar0	15	23		23,24,23,22,15	2	5	4	2	2	0,1,1,1	75	0	1	1	1	3	4	3					0.30103
8	21	15	Mon	GL4	bar0	15	5		5,8,10,13,15,22	4	5	4	1	0	1,1,1,1	100	1	1	0	0	3	4	3					0
8	21	16	Mon	GL4	bar0	15	2		2,3,4,5,8,10,13,15	5	8	7	1.4	2	1,0,1,1,1,1,1	85.7143	0	1	1	0	3	4	3					0.146128
8	21	17	Mon	GL4	bar0	15	14		14,16,24,23,22,15	3	6	5	1.66667	2	1,0,1,1,1	80	0	1	1	0	3	4	3					0.221849
8	21	18	Mon	GL4	bar0	15	17		17,18,19,20,21,22,15,12	4	7	6	1.5	2	1,1,0,1,1,1	83.3333	0	0	0	0	3	4	3					0.176091
8	21	19	Mon	GL4	bar0	15	8		8,11,14,16,13,15	3	6	5	1.66667	2	0,1,1,1,1	80	0	1	1	0	3	4	3					0.221849
8	21	20	Mon	GL4	bar0	15	9		9,6,17,18,19,20,21,22,23,22,15,12	2	11	10	5	8	0,0,1,1,0,1,1,0,1,1	60	0	0	0	0	3	4	3					0.69897
8	21	21	Mon	GL4	bar0	15	11		11,14,16,24,23,22,15	4	7	6	1.5	2	1,1,0,1,1,1	83.3333	0	0	1	0	3	4	3					0.176091
8	21	22	Mon	GL4	bar0	15	1		1,2,3,7,10,13,15,22	4	7	6	1.5	2	0,1,1,1,1,1	83.3333	0	1	0	0	3	4	3					0.176091
8	21	23	Mon	GL4	bar0	15	8		8,11,14,16,13,15	3	6	5	1.66667	2	0,1,1,1,1	80	0	1	1	0	3	4	3					0.221849
8	21	24	Mon	GL4	bar0	15	19		19,18,17,6,1,2,3,7,10,13,15	2	11	10	5	8	0,0,1,0,0,1,1,1,1,1	60	0	0	1	0	3	4	3					0.69897
8	21	25	Mon	GL4	bar0	15	23		23,22,21,20,19,12,15,22	2	7	6	3	4	1,0,0,1,1,1	66.6667	0	0	0	0	3	4	3					0.477121
8	21	26	Mon	GL4	bar0	15	7		7,9,12,15,22	3	4	3	1	0	1,1,1	100	1	1	0	0	3	4	3					0
8	21	27	Mon	GL4	bar0	15	19		19,20,21,22,15,22	2	5	4	2	2	0,1,1,1	75	0	1	0	0	3	4	3					0.30103
8	21	28	Mon	GL4	bar0	15	10		10,8,11,14,16,13,15	2	7	6	3	4	0,0,1,1,1,1	66.6667	0	1	1	0	3	4	3					0.477121
8	21	29	Mon	GL4	bar0	15	1		1,6,9,12,15,22	4	5	4	1	0	1,1,1,1	100	1	1	0	0	3	4	3					0
8	21	30	Mon	GL4	bar0	15	5		5,8,10,13,15,22	4	5	4	1	0	1,1,1,1	100	1	1	0	0	3	4	3					0
8	21	31	Mon	GL4	bar0	15	17		17,18,19,20,21,22,15,13	4	7	6	1.5	2	1,1,0,1,1,1	83.3333	0	0	0	0	3	4	3					0.176091
8	21	32	Mon	GL4	bar0	15	10		10,8,5,4,3,7,9,12,19,20,21,22,23,24,16,13,15,12	2	17	16	8	14	0,0,0,1,1,1,1,0,0,1,1,0,0,1,1,1	56.25	0	0	0	0	3	4	3					0.90309
5	22	1	Wed	GL4	bar0	8	17	PROBE	17,18,19,20,21,22,23,24,16,14,11,8,5	5	12	11	2.2	6	0,1,0,1,1,0,1,1,1,1,1	72.7273	0	0	0	0	3	4	4			1		0.342423
5	22	2	Wed	GL4	bar0	8	4		4,5,8	2	3	2	1	0	1,1	100	1	1	1	0	3	4	4					0
5	22	3	Wed	GL4	bar0	8	16		16,14,11,8	3	4	3	1	0	1,1,1	100	1	1	1	0	3	4	4					0
5	22	4	Wed	GL4	bar0	8	9		9,6,1,2,3,7,10,13,15,22,21,20,19,18,17,6,9,7,3,4,5,8	3	22	21	7	18	0,0,1,1,1,1,0,0,0,0,0,1,0,1,1,1,1,0,1,1,1	57.1429	0	0	1	0	3	4	4					0.845098
5	22	5	Wed	GL4	bar0	8	23		23,22,15,13,16,14,11,8	5	8	7	1.4	2	1,1,1,0,1,1,1	85.7143	0	0	1	0	3	4	4					0.146128
5	22	6	Wed	GL4	bar0	8	7		7,3,4,5,8	2	5	4	2	2	0,1,1,1	75	0	1	1	0	3	4	4					0.30103
5	22	7	Wed	GL4	bar0	8	22		22,21,20,19,18,17,6,1,2,3,4,5,8	4	13	12	3	8	0,0,1,0,1,1,0,1,1,1,1,1	66.6667	0	0	1	0	3	4	4					0.477121
5	22	8	Wed	GL4	bar0	8	18		18,19,12,15,22,23,24,16,13,10,8	6	11	10	1.66667	4	1,1,1,0,0,1,1,1,1,1	80	0	0	1	0	3	4	4					0.221849
5	22	9	Wed	GL4	bar0	8	23	PROBE: control nodes: 14 & 9	23,24,16,13,10,8,5	5	6	5	1	0	1,1,1,1,1	100	1	1	0	0	3	4	4			9		0
5	22	10	Wed	GL4	bar0	8	15		15,12,19,18,17,6,9,7,3,2,1,6,9,12,19,20,21,22,21,20,19,20,19,18,17,6,1,2,3,4,5,8	3	32	31	10.3333	28	0,0,0,1,1,1,1,0,0,0,1,1,0,0,0,1,1,0,0,1,0,1,0,1,1,0,1,1,1,1,1	54.8387	0	0	1	0	3	4	4					1.01424
5	22	11	Wed	GL4	bar0	8	1		1,2,3,4,5,8	5	6	5	1	0	1,1,1,1,1	100	1	1	1	0	3	4	4					0
5	22	12	Wed	GL4	bar0	8	21		21,20,19,18,17,6,1,2,1,6,17,18,19,20,21,22,23,24,16,14,11,8	5	22	21	4.2	16	0,1,0,1,1,0,1,0,1,0,0,1,0,1,1,0,1,1,1,1,1	61.9048	0	0	1	0	3	4	4					0.623249
5	22	13	Wed	GL4	bar0	8	16		16,24,23,22,21,20,19,18,17,6,9,7,10,8,5	3	14	13	4.33333	10	0,0,1,0,0,1,0,1,1,1,1,1,1	61.5385	0	0	0	0	3	4	4					0.636822
5	22	14	Wed	GL4	bar0	8	9		9,6,1,2,3,7,10,8	3	8	7	2.33333	4	0,0,1,1,1,1,1	71.4286	0	1	1	0	3	4	4					0.367977
5	22	15	Wed	GL4	bar0	8	4		4,5,8,10	2	3	2	1	0	1,1	100	1	1	0	0	3	4	4					0
5	22	16	Wed	GL4	bar0	8	15		15,12,15,22,23,24,16,14,11,8	3	10	9	3	6	0,1,0,0,1,1,1,1,1	66.6667	0	0	1	1	3	4	4					0.477121
5	22	17	Wed	GL4	bar0	8	2		2,1,6,17,18,19,20,21,22,15,13,16,14,11,8,5	4	15	14	3.5	10	0,1,0,0,1,0,1,1,1,1,0,1,1,1	64.2857	0	0	0	0	3	4	4					0.544068
5	22	18	Wed	GL4	bar0	8	13		13,10,8,5	2	3	2	1	0	1,1	100	1	1	0	0	3	4	4					0
5	22	19	Wed	GL4	bar0	8	19		19,20,21,22,23,24,16,13,15,22,15,22,23,24,16,14,11,8	5	18	17	3.4	12	0,1,1,0,1,1,1,0,0,1,0,0,1,1,1,1,1	64.7059	0	0	1	0	3	4	4					0.531479
5	22	20	Wed	GL4	bar0	8	14		14,11,8	2	3	2	1	0	1,1	100	1	1	1	0	3	4	4					0
5	22	21	Wed	GL4	bar0	8	9		9,6,17,18,19,12,15,22,21,22,23,24,16,13,10,8,5	3	16	15	5	12	0,0,0,1,1,1,0,0,1,0,1,1,1,1,1	60	0	0	0	0	3	4	4					0.69897
[truncated: 21,013 more rows]
[truncated: 1 more columns]
